# Supplementary material for: MCT1-dependent energetic failure and neuroinflammation underlie optic nerve degeneration in Wolfram syndrome mice
Source: eLife journal article supplement (doi:10.7554/elife.81779), 2023-01-16

**Figure 7B**

**WFS1**

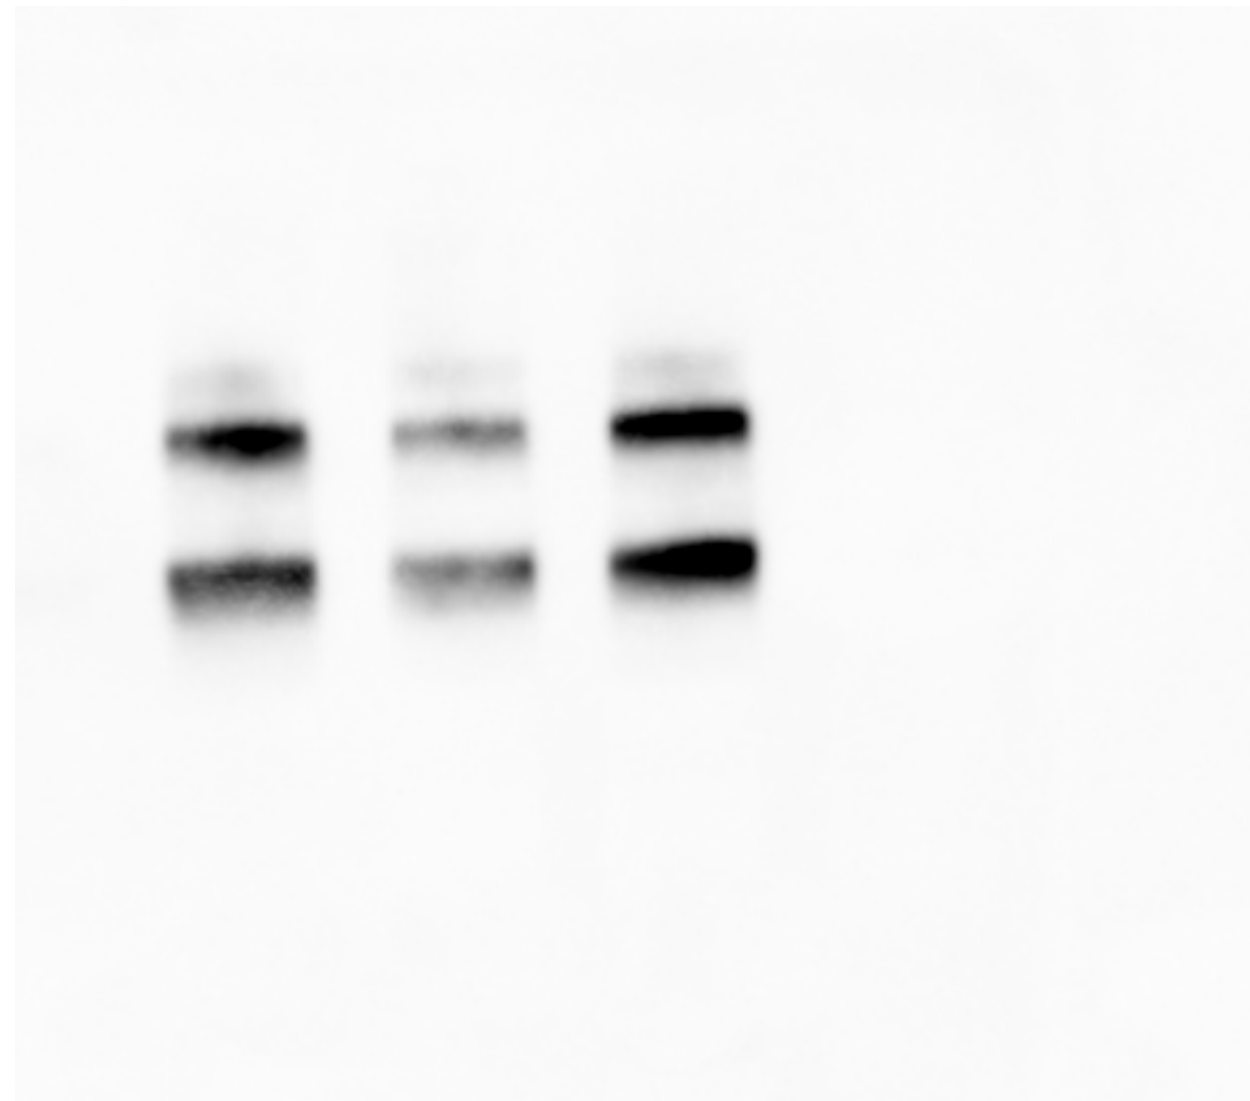

**MCT1**

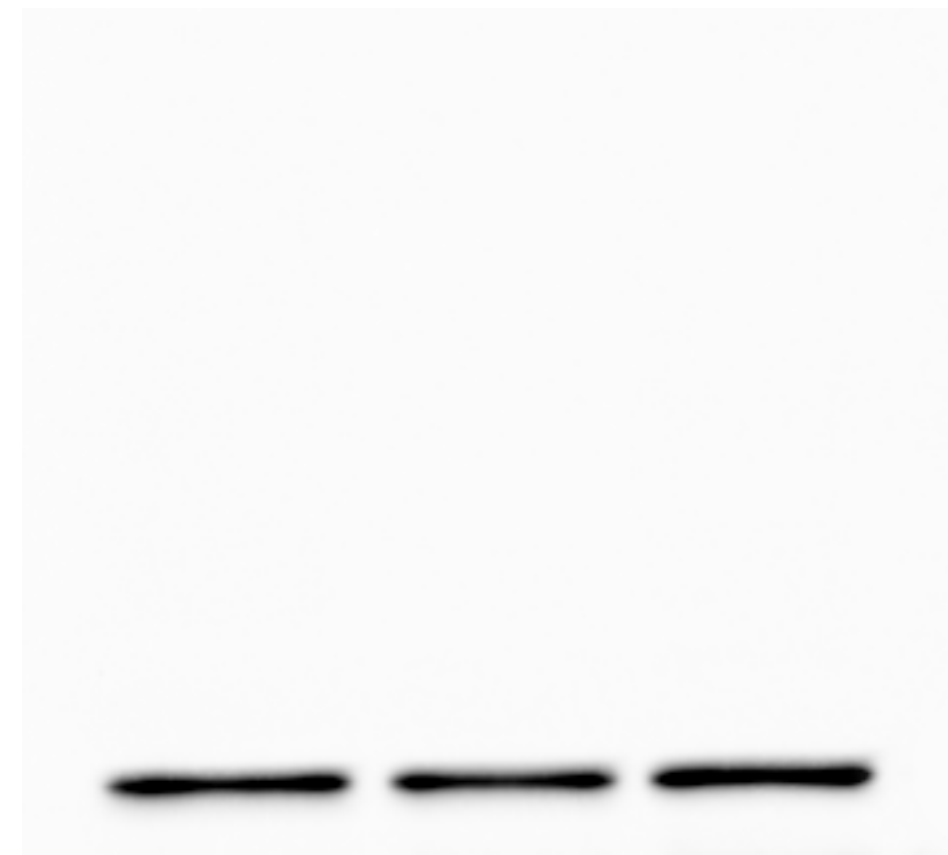

**ACTIN**

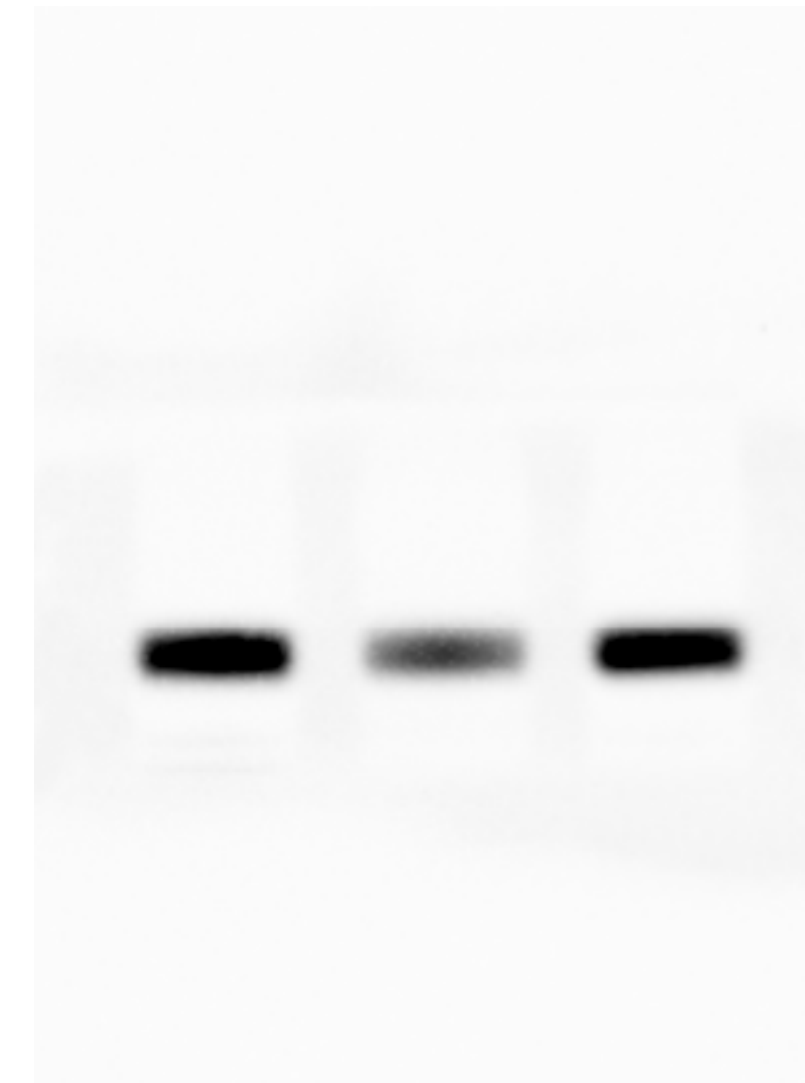

Supplement: supp [file elife-81779-supp-v1.zip]
