# Supplementary material for: MCT1-dependent energetic failure and neuroinflammation underlie optic nerve degeneration in Wolfram syndrome mice
Source: eLife. 2023 Jan 16;12:e81779. doi: 10.7554/eLife.81779 (PMC9891717; doi:10.7554/eLife.81779)
Supplement: Supplementary file 1. — Proteins with highly significant score and reported in Figure 6B were selected for fold change significance as determined by the Dave/DCI algorithms (>0.2 and<5, respectively; red and blue highlighted) and p-value (<0.05). Gene name is reported for protein presenting a P-value <0.05, only. [file elife-81779-supp1.xls]

## Sheet: Lists of Proteins
Accession	Reference	pI	MW (kDa)	Coverage	# PSMs	# Unique Peptides	Average PSM_WT 8m	Average PSM_KO 8m	DAve WT vs KO 8 mesi	DCi WT vs KO 8 mesi	DAve_KOvsWT	DCI_KOvsWT	F Ratio	Prob>F	Gene	High stringent	Fold Change (KO/WT)
Q8C605	ATP-dependent 6-phosphofructokinase OS=Mus musculus OX=10090 GN=Pfkp PE=1 SV=1	6.89	85.5	11.2245	90	4	4.625	2	0.792453	8.69531	-0.792453	-8.69531	5.15684	0.00558254	Pfkp	+	0.432432
P53986	Monocarboxylate transporter 1 OS=Mus musculus OX=10090 GN=Slc16a1 PE=1 SV=1	7.47	53.2	9.93915	97	3	4.125	2	0.693878	6.50781	-0.693878	-6.50781	3.94037	0.0179074	Slc16a1	+	0.484848
Q61012	Guanine nucleotide-binding protein G(T) subunit gamma-T1 OS=Mus musculus OX=10090 GN=Gngt1 PE=1 SV=3	4.82	8.5	37.8378	172	4	6.5	3.25	0.666667	15.8438	-0.666667	-15.8438	3.47701	0.0285297	Gngt1	+	0.5
P30681	High mobility group protein B2 OS=Mus musculus OX=10090 GN=Hmgb2 PE=1 SV=3	7.31	24.1	29.0476	539	6	18.25	10.125	0.572687	115.273	-0.572687	-115.273	15.1636	4.02715e-06	Hmgb2	+	0.554795
P97822	Acidic leucine-rich nuclear phosphoprotein 32 family member E OS=Mus musculus OX=10090 GN=Anp32e PE=1 SV=2	3.88	29.6	35	268	5	9.25	5.25	0.551724	29	-0.551724	-29	9.26483	0.000186312	Anp32e	+	0.567568
P62821	Ras-related protein Rab-1A OS=Mus musculus OX=10090 GN=Rab1A PE=1 SV=3	6.21	22.7	30.7317	264	2	9.375	5.875	0.459016	26.6875	-0.459016	-26.6875	3.41048	0.030533	Rab1A	+	0.626667
P15532	Nucleoside diphosphate kinase A OS=Mus musculus OX=10090 GN=Nme1 PE=1 SV=1	7.37	17.2	45.3947	164	6	5.625	3.75	0.4	8.78906	-0.4	-8.78906	2.99289	0.0470125	Nme1	+	0.666667
Q9CZU6	Citrate synthase, mitochondrial OS=Mus musculus OX=10090 GN=Cs PE=1 SV=1	8.57	51.7	7.75862	179	3	6.375	4.375	0.372093	10.75	-0.372093	-10.75	3.65437	0.0238371	Cs	+	0.686275
P18572	Basigin OS=Mus musculus OX=10090 GN=Bsg PE=1 SV=2	5.85	42.4	25.7069	309	8	11.875	8.375	0.345679	35.4375	-0.345679	-35.4375	4.79173	0.00785339	Bsg	+	0.705263
Q9Z275	Retinaldehyde-binding protein 1 OS=Mus musculus OX=10090 GN=Rlbp1 PE=1 SV=3	5.06	36.4	50.7886	331	11	12.125	9	0.295858	33.0078	-0.295858	-33.0078	7.76285	0.000592777	Rlbp1	+	0.742268
A0A0A0MQF6	Glyceraldehyde-3-phosphate dehydrogenase OS=Mus musculus OX=10090 GN=Gapdh PE=1 SV=1	8.97	38.6	59.3315	4827	16	151.375	120.125	0.230203	4242.19	-0.230203	-4242.19	3.53848	0.0268016	Gapdh	+	0.793559
P08249	Malate dehydrogenase, mitochondrial OS=Mus musculus OX=10090 GN=Mdh2 PE=1 SV=3	8.68	35.6	61.2426	1264	16	40.375	32.75	0.208547	278.789	-0.208547	-278.789	5.14649	0.00563626	Mdh2	+	0.811146
Q9QZQ8	Core histone macro-H2A.1 OS=Mus musculus OX=10090 GN=Macroh2a1 PE=1 SV=3	9.8	39.7	35.4839	378	9	10.625	13.375	-0.229167	-33	0.229167	33	3.62436	0.0245699	Macroh2a1	+	1.25882
P10126	Elongation factor 1-alpha 1 OS=Mus musculus OX=10090 GN=Eef1a1 PE=1 SV=3	9.01	50.1	26.6234	537	6	12.5	17.125	-0.312236	-68.5078	0.312236	68.5078	3.86896	0.0192247	Eef1a1	+	1.37
P62631	Elongation factor 1-alpha 2 OS=Mus musculus OX=10090 GN=Eef1a2 PE=1 SV=1	9.03	50.4	19.0065	289	3	6	9.375	-0.439024	-25.9453	0.439024	25.9453	4.27761	0.0128568	Eef1a2	+	1.5625
Q80WM3	Complexin-4 OS=Mus musculus OX=10090 GN=Cplx4 PE=1 SV=2	4.72	18.3	35	146	6	3.125	5.75	-0.591549	-11.6484	0.591549	11.6484	3.02442	0.0454901	Cplx4	+	1.84
A3KGU9	Spectrin alpha chain, non-erythrocytic 1 OS=Mus musculus OX=10090 GN=Sptan1 PE=1 SV=2	5.35	287.4	7.64612	169	16	3.75	7	-0.604651	-17.4688	0.604651	17.4688	3.14097	0.0402965	Sptan1	+	1.86667
Q9Z1N5	Spliceosome RNA helicase Ddx39b OS=Mus musculus OX=10090 GN=Ddx39b PE=1 SV=1	5.67	49	11.215	94	4	2	3.75	-0.608696	-5.03125	0.608696	5.03125	2.9721	0.0480457	Ddx39b	+	1.875
P31650	Sodium- and chloride-dependent GABA transporter 3 OS=Mus musculus OX=10090 GN=Slc6a11 PE=1 SV=2	6.98	69.9	7.17703	98	3	1.625	4.75	-0.980392	-9.96094	0.980392	9.96094	3.54864	0.0265268	Slc6a11	+	2.92308
P07724	Albumin OS=Mus musculus OX=10090 GN=Alb PE=1 SV=3	6.07	68.6	48.3553	479	23	6.25	20.5	-1.06542	-190.594	1.06542	190.594	7.94863	0.000511197	Alb	+	3.28
P03995	Glial fibrillary acidic protein OS=Mus musculus OX=10090 GN=Gfap PE=1 SV=4	5.34	49.9	23.4884	44	10	0	4.75	-2	-11.2812	2	11.2812	3.92391	0.0182023	Gfap	+	100
E0CXC0	Kv channel-interacting protein 2 (Fragment) OS=Mus musculus OX=10090 GN=Kcnip2 PE=1 SV=2	6.51	10.8	4.21053	8	1	0.875	0	2	0.382812	-2	-0.382812	3.01767	0.0458115	Kcnip2
B9EKF4	Zinc finger protein 777 OS=Mus musculus OX=10090 GN=Zfp777 PE=1 SV=1	6.8	99.4	3.9548	6	2	0.625	0	2	0.195312	-2	-0.195312	3.06583	0.0435685	Zfp777
Q8C266	Ras-related protein Rab-5C OS=Mus musculus OX=10090 GN=Rab5c PE=1 SV=1	8.16	25.3	9.40171	6	2	0.625	0	2	0.195312	-2	-0.195312	3.06583	0.0435685	Rab5c
G3X9Z7	Intraflagellar transport protein 88 homolog OS=Mus musculus OX=10090 GN=Ift88 PE=1 SV=1	5.9	93.1	1.09091	11	1	0.625	0	2	0.195312	-2	-0.195312
Q542V3	Serine/arginine-rich-splicing factor 4 OS=Mus musculus OX=10090 GN=Srsf4 PE=1 SV=1	11.37	56.2	1.83299	12	1	0.625	0	2	0.195312	-2	-0.195312
Q8CJ40	Rootletin OS=Mus musculus OX=10090 GN=Crocc PE=1 SV=2	5.55	226.8	1.89149	14	4	0.625	0	2	0.195312	-2	-0.195312
A7MAW9	Predicted gene 4553 (Fragment) OS=Mus musculus OX=10090 GN=Gm4553 PE=2 SV=1	7.91	20.5	56.3025	7	2	0.5	0	2	0.125	-2	-0.125
O55234	Proteasome subunit beta type-5 OS=Mus musculus OX=10090 GN=Psmb5 PE=1 SV=3	7.02	28.5	4.54545	6	1	0.5	0	2	0.125	-2	-0.125
P68040	Receptor of activated protein C kinase 1 OS=Mus musculus OX=10090 GN=Rack1 PE=1 SV=3	7.69	35.1	4.10095	13	1	0.5	0	2	0.125	-2	-0.125
Q6PFE7	Tomoregulin-1 OS=Mus musculus OX=10090 GN=Tmeff1 PE=2 SV=1	6.81	40.1	23.1183	5	4	0.5	0	2	0.125	-2	-0.125
Q80X90	Filamin-B OS=Mus musculus OX=10090 GN=Flnb PE=1 SV=3	5.71	277.7	4.49654	7	5	0.5	0	2	0.125	-2	-0.125
Q9CR21	Acyl carrier protein, mitochondrial OS=Mus musculus OX=10090 GN=Ndufab1 PE=1 SV=1	5.21	17.4	9.61538	6	2	0.5	0	2	0.125	-2	-0.125
Q9DCQ2	Putative L-aspartate dehydrogenase OS=Mus musculus OX=10090 GN=Aspdh PE=1 SV=1	6.95	30.3	2.78746	10	1	0.5	0	2	0.125	-2	-0.125
Q9QUM9	Proteasome subunit alpha type-6 OS=Mus musculus OX=10090 GN=Psma6 PE=1 SV=1	6.76	27.4	15.0407	17	3	0.5	0	2	0.125	-2	-0.125
Q9WV34	MAGUK p55 subfamily member 2 OS=Mus musculus OX=10090 GN=Mpp2 PE=1 SV=1	6.44	61.5	2.53623	8	1	0.5	0	2	0.125	-2	-0.125
A0A0R4J0G4	Ran-binding protein 10 OS=Mus musculus OX=10090 GN=Ranbp10 PE=1 SV=1	6.68	70	11.2654	3	3	0.375	0	2	0.0703125	-2	-0.0703125	4.39394	0.0114851	Ranbp10
S4R2I9	Zinc finger protein 532 OS=Mus musculus OX=10090 GN=Zfp532 PE=1 SV=1	8.59	141.3	0.613497	3	1	0.375	0	2	0.0703125	-2	-0.0703125	4.39394	0.0114851	Zfp532
A0A1B0GRY3	Predicted gene 45861 OS=Mus musculus OX=10090 GN=Gm45861 PE=1 SV=1	5.88	215.4	1.35205	3	1	0.375	0	2	0.0703125	-2	-0.0703125
E9Q2S7	Zinc finger protein 266 OS=Mus musculus OX=10090 GN=Zfp266 PE=1 SV=1	6.76	68.4	4.96689	3	2	0.375	0	2	0.0703125	-2	-0.0703125
F6XXH9	Inosine-5'-monophosphate dehydrogenase 1 (Fragment) OS=Mus musculus OX=10090 GN=Impdh1 PE=1 SV=1	8.41	19.5	23.5294	3	1	0.375	0	2	0.0703125	-2	-0.0703125
Q6NVD9	Phakinin OS=Mus musculus OX=10090 GN=Bfsp2 PE=1 SV=1	5.33	45.7	2.16346	6	1	0.375	0	2	0.0703125	-2	-0.0703125
Q91UZ1	1-phosphatidylinositol 4,5-bisphosphate phosphodiesterase OS=Mus musculus OX=10090 GN=Plcb4 PE=1 SV=1	6.9	134.4	2.97872	5	3	0.375	0	2	0.0703125	-2	-0.0703125
Q9EQ14	Interleukin-23 subunit alpha OS=Mus musculus OX=10090 GN=Il23a PE=1 SV=1	6.27	22.1	9.18367	3	1	0.375	0	2	0.0703125	-2	-0.0703125
A0A087WSN0	Keratin-associated protein 5-3 OS=Mus musculus OX=10090 GN=Krtap5-3 PE=4 SV=1	7.81	30	12.6404	3	1	0.25	0	2	0.03125	-2	-0.03125
A0A0A0MQC6	Endosome/lysosome-associated apoptosis and autophagy regulator 1 OS=Mus musculus OX=10090 GN=Elapor1 PE=1 SV=1	6.35	111.1	2.66535	2	1	0.25	0	2	0.03125	-2	-0.03125
A0A0G2JDZ7	Nexilin OS=Mus musculus OX=10090 GN=Nexn PE=4 SV=1	9.79	5.1	41.8605	4	1	0.25	0	2	0.03125	-2	-0.03125
A0A0G2JEB6	Cilia and flagella-associated protein 47 OS=Mus musculus OX=10090 GN=Cfap47 PE=1 SV=2	7.99	360.1	0.785176	3	1	0.25	0	2	0.03125	-2	-0.03125
A0A0R4J008	Histone deacetylase 2 OS=Mus musculus OX=10090 GN=Hdac2 PE=1 SV=1	5.91	55.3	3.27869	2	2	0.25	0	2	0.03125	-2	-0.03125
A0A1B0GSA0	Predicted gene 45618 OS=Mus musculus OX=10090 GN=Gm45618 PE=4 SV=1	7.81	21	36.9863	4	3	0.25	0	2	0.03125	-2	-0.03125
A0A1D5RMB0	Alcohol dehydrogenase 6B (class V) OS=Mus musculus OX=10090 GN=Adh6b PE=3 SV=1	8.13	41.1	6.51042	2	1	0.25	0	2	0.03125	-2	-0.03125
A0A1L1SV25	Alpha-actinin-4 OS=Mus musculus OX=10090 GN=Actn4 PE=1 SV=1	5.36	107	6.86695	7	3	0.25	0	2	0.03125	-2	-0.03125
A0A1W2P6T8	Coiled-coil domain-containing protein 162 OS=Mus musculus OX=10090 GN=Ccdc162 PE=1 SV=1	7.42	104.2	0.877193	3	1	0.25	0	2	0.03125	-2	-0.03125
A0A286YD60	Kelch domain-containing 7B OS=Mus musculus OX=10090 GN=Klhdc7b PE=4 SV=1	7.66	133.8	3.48377	3	2	0.25	0	2	0.03125	-2	-0.03125
A0A338P6K2	Myosin-11 OS=Mus musculus OX=10090 GN=Myh11 PE=1 SV=1	5.48	227.7	1.06114	3	2	0.25	0	2	0.03125	-2	-0.03125
A0A5F8MPH8	Tenascin XB OS=Mus musculus OX=10090 GN=Tnxb PE=1 SV=1	5.39	473.8	1.3315	3	3	0.25	0	2	0.03125	-2	-0.03125
A0A5F8MPV2	STE20-like serine/threonine-protein kinase (Fragment) OS=Mus musculus OX=10090 GN=Slk PE=1 SV=1	7.99	11.5	7.14286	2	1	0.25	0	2	0.03125	-2	-0.03125
A2ADM8	Zinc finger protein 831 OS=Mus musculus OX=10090 GN=Zfp831 PE=4 SV=1	7.9	174	1.7199	2	2	0.25	0	2	0.03125	-2	-0.03125
A2AG68	P-type Cu(+) transporter OS=Mus musculus OX=10090 GN=Atp7a PE=1 SV=1	6.62	161.9	5.563	4	3	0.25	0	2	0.03125	-2	-0.03125
A2API5	Low-density lipoprotein receptor-related protein 1B OS=Mus musculus OX=10090 GN=Lrp1b PE=1 SV=2	5.39	513.2	2.1309	4	4	0.25	0	2	0.03125	-2	-0.03125
A3KFM7	Chromodomain-helicase-DNA-binding protein 6 OS=Mus musculus OX=10090 GN=Chd6 PE=1 SV=1	6.38	305.2	1.18038	2	2	0.25	0	2	0.03125	-2	-0.03125
B1AT01	RIKEN cDNA 1700084M14 gene OS=Mus musculus OX=10090 GN=1700084M14Rik PE=4 SV=1	10.67	8.8	23.0769	2	1	0.25	0	2	0.03125	-2	-0.03125
B1AWL2	Zinc finger protein 462 OS=Mus musculus OX=10090 GN=Znf462 PE=1 SV=1	7.33	282.5	2.28457	4	2	0.25	0	2	0.03125	-2	-0.03125
B3F5L4	SCART2 splice variant A OS=Mus musculus OX=10090 GN=Scart2 PE=1 SV=1	4.92	119.5	1.97842	3	1	0.25	0	2	0.03125	-2	-0.03125
D3YV99	COP9 signalosome complex subunit 4 (Fragment) OS=Mus musculus OX=10090 GN=Cops4 PE=1 SV=1	6.54	28.4	12.7049	2	1	0.25	0	2	0.03125	-2	-0.03125
D3YXV6	Glutathione hydrolase 1 proenzyme (Fragment) OS=Mus musculus OX=10090 GN=Ggt1 PE=4 SV=1	7.24	13.5	3.1746	2	1	0.25	0	2	0.03125	-2	-0.03125
D3Z5R0	Cyclic GMP-AMP synthase OS=Mus musculus OX=10090 GN=Cgas PE=1 SV=1	9.89	44.3	3.04569	2	1	0.25	0	2	0.03125	-2	-0.03125
D3Z5Y0	Endothelial cell-selective adhesion molecule (Fragment) OS=Mus musculus OX=10090 GN=Esam PE=1 SV=1	8.53	27.2	4.36508	2	1	0.25	0	2	0.03125	-2	-0.03125
E0CX54	RAS guanyl-releasing protein 4 (Fragment) OS=Mus musculus OX=10090 GN=Rasgrp4 PE=1 SV=4	8.62	48.1	0.932401	3	1	0.25	0	2	0.03125	-2	-0.03125
E9PV87	Protein TALPID3 OS=Mus musculus OX=10090 GN=Talpid3 PE=1 SV=1	6.32	166.6	2.96053	6	3	0.25	0	2	0.03125	-2	-0.03125
E9PY16	ArfGAP with dual PH domains 1 OS=Mus musculus OX=10090 GN=Adap1 PE=1 SV=1	8.65	43.3	6.68449	2	1	0.25	0	2	0.03125	-2	-0.03125
E9Q1P8	Interferon regulatory factor 2-binding protein 2 OS=Mus musculus OX=10090 GN=Irf2bp2 PE=1 SV=1	8.69	59.3	3.33333	2	1	0.25	0	2	0.03125	-2	-0.03125
E9Q616	AHNAK nucleoprotein (desmoyokin) OS=Mus musculus OX=10090 GN=Ahnak PE=1 SV=1	6.3	603.9	0.972419	2	2	0.25	0	2	0.03125	-2	-0.03125
E9Q7P2	Voltage-dependent T-type calcium channel subunit alpha OS=Mus musculus OX=10090 GN=Cacna1i PE=1 SV=1	6.47	242.7	2.77399	2	2	0.25	0	2	0.03125	-2	-0.03125
E9Q876	Glucosylceramide transporter ABCA12 OS=Mus musculus OX=10090 GN=Abca12 PE=1 SV=1	7.93	292.4	0.26975	4	1	0.25	0	2	0.03125	-2	-0.03125
F6QJX8	E3 ubiquitin-protein ligase makorin-1 (Fragment) OS=Mus musculus OX=10090 GN=Mkrn1 PE=1 SV=1	8.76	23.4	13.5266	2	1	0.25	0	2	0.03125	-2	-0.03125
F6WC15	Guanine nucleotide-binding protein G(o) subunit alpha (Fragment) OS=Mus musculus OX=10090 GN=Gnao1 PE=1 SV=1	5.41	12.6	27.5229	3	1	0.25	0	2	0.03125	-2	-0.03125
G3X9F6	SH3 domain and tetratricopeptide repeats 1 OS=Mus musculus OX=10090 GN=Sh3tc1 PE=1 SV=1	6.24	149.3	1.63447	2	1	0.25	0	2	0.03125	-2	-0.03125
G3X9K3	Brefeldin A-inhibited guanine nucleotide-exchange protein 1 OS=Mus musculus OX=10090 GN=Arfgef1 PE=1 SV=1	5.86	208.4	1.35428	5	2	0.25	0	2	0.03125	-2	-0.03125
J3QMP3	Androglobin OS=Mus musculus OX=10090 GN=Adgb PE=1 SV=1	8.19	188.8	1.08434	2	2	0.25	0	2	0.03125	-2	-0.03125
O08997	Copper transport protein ATOX1 OS=Mus musculus OX=10090 GN=Atox1 PE=1 SV=1	6.51	7.3	26.4706	5	1	0.25	0	2	0.03125	-2	-0.03125
O09114	Prostaglandin-H2 D-isomerase OS=Mus musculus OX=10090 GN=Ptgds PE=1 SV=1	8.25	21.1	14.2857	2	1	0.25	0	2	0.03125	-2	-0.03125
O35900	U6 snRNA-associated Sm-like protein LSm2 OS=Mus musculus OX=10090 GN=Lsm2 PE=1 SV=1	6.52	10.8	35.7895	5	2	0.25	0	2	0.03125	-2	-0.03125
O88207	Collagen alpha-1(V) chain OS=Mus musculus OX=10090 GN=Col5a1 PE=1 SV=2	4.98	183.6	1.36017	2	1	0.25	0	2	0.03125	-2	-0.03125
O88783	Coagulation factor V OS=Mus musculus OX=10090 GN=F5 PE=1 SV=1	6.05	247.1	2.01557	3	3	0.25	0	2	0.03125	-2	-0.03125
P09055	Integrin beta-1 OS=Mus musculus OX=10090 GN=Itgb1 PE=1 SV=1	5.94	88.2	7.14286	4	4	0.25	0	2	0.03125	-2	-0.03125
P11031	Activated RNA polymerase II transcriptional coactivator p15 OS=Mus musculus OX=10090 GN=Sub1 PE=1 SV=3	9.6	14.4	8.66142	8	1	0.25	0	2	0.03125	-2	-0.03125
P28229	Gap junction gamma-1 protein OS=Mus musculus OX=10090 GN=Gjc1 PE=1 SV=1	7.4	45.6	12.1212	2	1	0.25	0	2	0.03125	-2	-0.03125
P30415	NK-tumor recognition protein OS=Mus musculus OX=10090 GN=Nktr PE=1 SV=4	10.05	163.4	1.30764	2	1	0.25	0	2	0.03125	-2	-0.03125
P49769	Presenilin-1 OS=Mus musculus OX=10090 GN=Psen1 PE=1 SV=1	5.38	52.6	5.78158	2	1	0.25	0	2	0.03125	-2	-0.03125
P51949	CDK-activating kinase assembly factor MAT1 OS=Mus musculus OX=10090 GN=Mnat1 PE=1 SV=2	5.82	35.8	13.2686	2	2	0.25	0	2	0.03125	-2	-0.03125
P63242	Eukaryotic translation initiation factor 5A-1 OS=Mus musculus OX=10090 GN=Eif5a PE=1 SV=2	5.24	16.8	15.5844	2	1	0.25	0	2	0.03125	-2	-0.03125
P80313	T-complex protein 1 subunit eta OS=Mus musculus OX=10090 GN=Cct7 PE=1 SV=1	7.84	59.6	2.20588	5	1	0.25	0	2	0.03125	-2	-0.03125
P80317	T-complex protein 1 subunit zeta OS=Mus musculus OX=10090 GN=Cct6a PE=1 SV=3	7.08	58	2.25989	6	1	0.25	0	2	0.03125	-2	-0.03125
Q08874	Microphthalmia-associated transcription factor OS=Mus musculus OX=10090 GN=Mitf PE=1 SV=4	6.33	58.6	7.03422	2	2	0.25	0	2	0.03125	-2	-0.03125
Q3TYD6	Serine/threonine-protein kinase LMTK2 OS=Mus musculus OX=10090 GN=Lmtk2 PE=1 SV=3	4.51	160.4	0.543848	2	1	0.25	0	2	0.03125	-2	-0.03125
Q3U0X6	Zinc finger protein 217 OS=Mus musculus OX=10090 GN=Zfp217 PE=1 SV=1	8.15	113.5	2.40154	2	2	0.25	0	2	0.03125	-2	-0.03125
Q3U827	E3 ubiquitin-protein ligase RNF180 OS=Mus musculus OX=10090 GN=Rnf180 PE=1 SV=2	8.21	67.3	1.52027	5	1	0.25	0	2	0.03125	-2	-0.03125
Q3U829	AP-5 complex subunit zeta-1 OS=Mus musculus OX=10090 GN=Ap5z1 PE=2 SV=1	6.95	89.4	2.3544	3	1	0.25	0	2	0.03125	-2	-0.03125
Q3UGB5	DAZ-associated protein 1 OS=Mus musculus OX=10090 GN=Dazap1 PE=1 SV=1	8.56	43.1	2.95567	6	2	0.25	0	2	0.03125	-2	-0.03125
Q3UKK2	Carcinoembryonic antigen-related cell adhesion molecule 5 OS=Mus musculus OX=10090 GN=Ceacam5 PE=2 SV=1	6.8	106.2	2.00634	3	1	0.25	0	2	0.03125	-2	-0.03125
Q3V0C5	Ubiquitin carboxyl-terminal hydrolase 48 OS=Mus musculus OX=10090 GN=Usp48 PE=1 SV=2	6.25	120.6	3.61217	2	2	0.25	0	2	0.03125	-2	-0.03125
Q4VAE3	Transmembrane protein 65 OS=Mus musculus OX=10090 GN=Tmem65 PE=1 SV=1	7.78	24.9	4.70085	5	1	0.25	0	2	0.03125	-2	-0.03125
Q5NC57	Protein FAM183B OS=Mus musculus OX=10090 GN=Fam183b PE=1 SV=2	8.4	16.1	6.66667	2	1	0.25	0	2	0.03125	-2	-0.03125
Q5SYL3	Protein KIAA0100 OS=Mus musculus OX=10090 GN=Kiaa0100 PE=1 SV=1	7.34	254.3	1.9248	2	2	0.25	0	2	0.03125	-2	-0.03125
Q61553	Fascin OS=Mus musculus OX=10090 GN=Fscn1 PE=1 SV=4	6.89	54.5	4.25963	2	1	0.25	0	2	0.03125	-2	-0.03125
Q62066	Paired mesoderm homeobox protein 2A OS=Mus musculus OX=10090 GN=Phox2a PE=2 SV=1	8.76	29.4	10	2	1	0.25	0	2	0.03125	-2	-0.03125
Q6PB66	Leucine-rich PPR motif-containing protein, mitochondrial OS=Mus musculus OX=10090 GN=Lrpprc PE=1 SV=2	6.83	156.5	0.718391	2	1	0.25	0	2	0.03125	-2	-0.03125
Q80SX8	ATP-dependent DNA helicase PIF1 OS=Mus musculus OX=10090 GN=Pif1 PE=1 SV=2	9.29	70.9	8.76923	2	2	0.25	0	2	0.03125	-2	-0.03125
Q80ZE3	Sialic acid-binding Ig-like lectin 10 OS=Mus musculus OX=10090 GN=Siglec10 PE=1 SV=1	6.71	76.8	3.92442	2	1	0.25	0	2	0.03125	-2	-0.03125
Q811P8	Rho GTPase-activating protein 32 OS=Mus musculus OX=10090 GN=Arhgap32 PE=1 SV=2	6.86	229.6	2.5371	2	2	0.25	0	2	0.03125	-2	-0.03125
Q8BFR5	Elongation factor Tu, mitochondrial OS=Mus musculus OX=10090 GN=Tufm PE=1 SV=1	7.56	49.5	9.73451	7	3	0.25	0	2	0.03125	-2	-0.03125
Q8CG47	Structural maintenance of chromosomes protein 4 OS=Mus musculus OX=10090 GN=Smc4 PE=1 SV=1	7.3	146.8	0.855365	3	1	0.25	0	2	0.03125	-2	-0.03125
Q8CHE4	PH domain leucine-rich repeat-containing protein phosphatase 1 OS=Mus musculus OX=10090 GN=Phlpp1 PE=1 SV=2	6.19	182.3	3.37878	3	2	0.25	0	2	0.03125	-2	-0.03125
Q8JZR6	Electroneutral sodium bicarbonate exchanger 1 OS=Mus musculus OX=10090 GN=Slc4a8 PE=2 SV=1	6.6	122.3	5.6933	2	2	0.25	0	2	0.03125	-2	-0.03125
Q8VFK4	Olfactory receptor OS=Mus musculus OX=10090 GN=Olfr1043 PE=3 SV=1	7.25	35.3	8.28025	2	1	0.25	0	2	0.03125	-2	-0.03125
Q91V55	40S ribosomal protein S5 OS=Mus musculus OX=10090 GN=Rps5 PE=1 SV=1	9.72	22.9	7.35294	2	1	0.25	0	2	0.03125	-2	-0.03125
Q91V88	Nephronectin OS=Mus musculus OX=10090 GN=Npnt PE=1 SV=1	8.35	61.5	9.09091	5	2	0.25	0	2	0.03125	-2	-0.03125
Q9CZU3	Exosome RNA helicase MTR4 OS=Mus musculus OX=10090 GN=Mtrex PE=1 SV=1	6.4	117.6	1.63462	2	1	0.25	0	2	0.03125	-2	-0.03125
Q9D2G2	Dihydrolipoyllysine-residue succinyltransferase component of 2-oxoglutarate dehydrogenase complex, mitochondrial OS=Mus musculus OX=10090 GN=Dlst PE=1 SV=1	8.95	49	1.98238	8	1	0.25	0	2	0.03125	-2	-0.03125
Q9DBT4	Ectonucleoside triphosphate diphosphohydrolase 4 OS=Mus musculus OX=10090 GN=Entpd4 PE=1 SV=1	8.07	69.7	3.42577	3	1	0.25	0	2	0.03125	-2	-0.03125
Q9JI08	Bridging integrator 3 OS=Mus musculus OX=10090 GN=Bin3 PE=1 SV=1	6.96	29.6	2.7668	2	1	0.25	0	2	0.03125	-2	-0.03125
Q9QWV9	Cyclin-T1 OS=Mus musculus OX=10090 GN=Ccnt1 PE=1 SV=3	8.68	80.5	0.828729	2	1	0.25	0	2	0.03125	-2	-0.03125
Q9QXX0	Protein jagged-1 OS=Mus musculus OX=10090 GN=Jag1 PE=1 SV=1	6.25	134.1	6.15764	2	2	0.25	0	2	0.03125	-2	-0.03125
Q9QYC7	Vitamin K-dependent gamma-carboxylase OS=Mus musculus OX=10090 GN=Ggcx PE=1 SV=1	8.02	87.1	4.62351	2	2	0.25	0	2	0.03125	-2	-0.03125
Q9WUL7	ADP-ribosylation factor-like protein 3 OS=Mus musculus OX=10090 GN=Arl3 PE=1 SV=1	7.24	20.5	10.4396	4	1	0.25	0	2	0.03125	-2	-0.03125
Q9Z0L0	Trophoblast glycoprotein OS=Mus musculus OX=10090 GN=Tpbg PE=1 SV=3	6.83	46.4	3.75587	3	1	0.25	0	2	0.03125	-2	-0.03125
V9GXR0	Histocompatibility 2, blastocyst OS=Mus musculus OX=10090 GN=H2-Bl PE=3 SV=1	6.37	29	1.94553	3	1	0.25	0	2	0.03125	-2	-0.03125
A0A087WNV6	5'-3' exoribonuclease 1 OS=Mus musculus OX=10090 GN=Xrn1 PE=1 SV=1	6.19	112.4	0.412797	1	1	0.125	0	2	0.0078125	-2	-0.0078125	3.87318	0.0191442	Krtap5-2
A0A075B5N9	Immunoglobulin kappa variable 3-7 OS=Mus musculus OX=10090 GN=Igkv3-7 PE=4 SV=7	6.25	10.8	49.4949	1	1	0.125	0	2	0.0078125	-2	-0.0078125
A0A087WQI0	Protein STPG4 OS=Mus musculus OX=10090 GN=Stpg4 PE=4 SV=1	9.1	20.2	6.74157	2	1	0.125	0	2	0.0078125	-2	-0.0078125
A0A087WRX0	Lymphocyte antigen 6 complex, locus G6G OS=Mus musculus OX=10090 GN=Ly6g6g PE=4 SV=1	8.56	8.7	32.1839	1	1	0.125	0	2	0.0078125	-2	-0.0078125
A0A0A6YXG8	Feline leukemia virus subgroup C receptor-related protein 1 (Fragment) OS=Mus musculus OX=10090 GN=Flvcr1 PE=1 SV=1	7.85	26.7	8.53659	1	1	0.125	0	2	0.0078125	-2	-0.0078125
A0A0A6YXX6	Serine/arginine-rich-splicing factor 6 OS=Mus musculus OX=10090 GN=Srsf6 PE=1 SV=1	5.34	15.5	37.037	1	1	0.125	0	2	0.0078125	-2	-0.0078125
A0A0A6YY18	Kinase OS=Mus musculus OX=10090 GN=Ip6k2 PE=1 SV=1	9.55	12.3	19.0909	1	1	0.125	0	2	0.0078125	-2	-0.0078125
A0A0B4J1N9	HECT-type E3 ubiquitin transferase (Fragment) OS=Mus musculus OX=10090 GN=Trip12 PE=1 SV=5	9.22	106.4	0.407332	4	1	0.125	0	2	0.0078125	-2	-0.0078125
A0A0C3SFZ4	Pseudouridine-5'-phosphatase OS=Mus musculus OX=10090 GN=Pudp PE=1 SV=1	6.16	26.2	15.812	1	1	0.125	0	2	0.0078125	-2	-0.0078125
A0A0D2X7Z2	EEF1A lysine methyltransferase 1 OS=Mus musculus OX=10090 GN=Eef1akmt1 PE=1 SV=1	4.69	25.7	8.92857	1	1	0.125	0	2	0.0078125	-2	-0.0078125
A0A0G2JEC4	Endophilin-B1 OS=Mus musculus OX=10090 GN=Sh3glb1 PE=1 SV=1	6.44	44.3	2.28426	4	1	0.125	0	2	0.0078125	-2	-0.0078125
A0A0G2JGP4	GTPase NRas (Fragment) OS=Mus musculus OX=10090 GN=Nras PE=1 SV=1	5.17	20.6	7.10383	2	1	0.125	0	2	0.0078125	-2	-0.0078125
A0A0G2LB90	Tubulin polyglutamylase TTLL7 OS=Mus musculus OX=10090 GN=Ttll7 PE=1 SV=1	9.13	105.4	2.30263	1	1	0.125	0	2	0.0078125	-2	-0.0078125
A0A0N4SVZ4	von Willebrand factor D and EGF domain-containing protein OS=Mus musculus OX=10090 GN=Vwde PE=4 SV=1	5.57	194.9	3.4405	3	2	0.125	0	2	0.0078125	-2	-0.0078125
A0A0R4J025	RCC1 and BTB domain-containing protein 1 OS=Mus musculus OX=10090 GN=Rcbtb1 PE=1 SV=1	6.43	58.3	8.47458	1	1	0.125	0	2	0.0078125	-2	-0.0078125
A0A0R4J083	Long-chain specific acyl-CoA dehydrogenase, mitochondrial OS=Mus musculus OX=10090 GN=Acadl PE=1 SV=1	8.15	47.9	6.74419	1	1	0.125	0	2	0.0078125	-2	-0.0078125
A0A0R4J097	Transforming growth factor beta receptor type 3 OS=Mus musculus OX=10090 GN=Tgfbr3 PE=1 SV=1	6.06	93.7	2.70588	1	1	0.125	0	2	0.0078125	-2	-0.0078125
A0A0R4J0B2	Phospholipase B-like OS=Mus musculus OX=10090 GN=Plbd1 PE=1 SV=1	8.87	63	6	1	1	0.125	0	2	0.0078125	-2	-0.0078125
A0A0R4J0H8	Fibronectin type III domain-containing protein 3B OS=Mus musculus OX=10090 GN=Fndc3b PE=1 SV=1	6.29	132.7	0.8285	1	1	0.125	0	2	0.0078125	-2	-0.0078125
A0A0R4J0N5	Programmed cell death protein 2 OS=Mus musculus OX=10090 GN=Pdcd2 PE=1 SV=1	5.38	38.3	5.53936	1	1	0.125	0	2	0.0078125	-2	-0.0078125
A0A0R4J0S5	Beta-defensin OS=Mus musculus OX=10090 GN=Defb12 PE=3 SV=1	8.19	9.7	11.7647	1	1	0.125	0	2	0.0078125	-2	-0.0078125
A0A0R4J0V1	Integrator complex subunit 10 OS=Mus musculus OX=10090 GN=Ints10 PE=1 SV=1	7.21	84.8	2.03804	1	1	0.125	0	2	0.0078125	-2	-0.0078125
A0A0R4J0X4	Speriolin OS=Mus musculus OX=10090 GN=Spatc1 PE=4 SV=1	8.18	51.3	5.83333	2	1	0.125	0	2	0.0078125	-2	-0.0078125
A0A0R4J1W5	FANCD2 opposite strand protein OS=Mus musculus OX=10090 GN=Fancd2os PE=4 SV=1	9.47	20.2	11.236	1	1	0.125	0	2	0.0078125	-2	-0.0078125
A0A0R4J2B2	BTB/POZ domain-containing protein KCTD12 OS=Mus musculus OX=10090 GN=Kctd12 PE=1 SV=1	5.81	35.9	12.844	1	1	0.125	0	2	0.0078125	-2	-0.0078125
A0A0U1RPT0	Serine/threonine-protein phosphatase 6 regulatory subunit 1 (Fragment) OS=Mus musculus OX=10090 GN=Ppp6r1 PE=1 SV=1	6.3	16.4	8.21918	1	1	0.125	0	2	0.0078125	-2	-0.0078125
A0A0U1RQ03	Kelch-like protein 25 OS=Mus musculus OX=10090 GN=Klhl25 PE=1 SV=1	7.83	31.2	4.57746	1	1	0.125	0	2	0.0078125	-2	-0.0078125
A0A140LHH9	Predicted gene, 35339 OS=Mus musculus OX=10090 GN=Gm35339 PE=4 SV=2	6.49	187.1	1.14183	1	1	0.125	0	2	0.0078125	-2	-0.0078125
A0A140LI70	Myosin-binding protein C, fast-type (Fragment) OS=Mus musculus OX=10090 GN=Mybpc2 PE=1 SV=1	9.13	17.2	21.2903	1	1	0.125	0	2	0.0078125	-2	-0.0078125
A0A140LIT2	7-dehydrocholesterol reductase OS=Mus musculus OX=10090 GN=Dhcr7 PE=1 SV=1	8.35	54.2	8.22785	1	1	0.125	0	2	0.0078125	-2	-0.0078125
A0A140LJH1	Glutaminyl-tRNA synthetase OS=Mus musculus OX=10090 GN=Qars PE=1 SV=1	10.78	11.1	11	1	1	0.125	0	2	0.0078125	-2	-0.0078125
A0A140T8J7	Olfactory receptor OS=Mus musculus OX=10090 GN=Olfr1326-ps1 PE=3 SV=1	8.16	35	18.328	1	1	0.125	0	2	0.0078125	-2	-0.0078125
A0A140T8R3	Protein KRBA1 OS=Mus musculus OX=10090 GN=Krba1 PE=4 SV=1	7.11	115.5	0.927644	1	1	0.125	0	2	0.0078125	-2	-0.0078125
A0A1B0GQX6	Protein lin-7 homolog B (Fragment) OS=Mus musculus OX=10090 GN=Lin7b PE=4 SV=1	11.63	5.8	42.3077	1	1	0.125	0	2	0.0078125	-2	-0.0078125
A0A1B0GRU2	Olfactory receptor 573, pseudogene 1 OS=Mus musculus OX=10090 GN=Olfr573-ps1 PE=4 SV=1	8.31	33	7.07071	1	1	0.125	0	2	0.0078125	-2	-0.0078125
A0A1B0GSB1	Ribonucleoside-diphosphate reductase large subunit (Fragment) OS=Mus musculus OX=10090 GN=Rrm1 PE=1 SV=1	8.18	7.7	6.15385	1	1	0.125	0	2	0.0078125	-2	-0.0078125
A0A1B0GSF4	Olfactory receptor OS=Mus musculus OX=10090 GN=Olfr65 PE=3 SV=2	8.87	35.5	14.6032	1	1	0.125	0	2	0.0078125	-2	-0.0078125
A0A1D5RLL4	Transformation/transcription domain-associated protein OS=Mus musculus OX=10090 GN=Trrap PE=1 SV=1	8.18	437.1	0.984711	2	2	0.125	0	2	0.0078125	-2	-0.0078125
A0A1L1SQT2	Olfactory receptor OS=Mus musculus OX=10090 GN=Olfr1130 PE=3 SV=1	8.62	34.9	9.87261	1	1	0.125	0	2	0.0078125	-2	-0.0078125
A0A1L1SQZ6	Dual-specificity protein kinase CLK3 (Fragment) OS=Mus musculus OX=10090 GN=Clk3 PE=1 SV=1	7.21	30.9	6.84411	1	1	0.125	0	2	0.0078125	-2	-0.0078125
A0A1L1SSZ5	Olfactory receptor 1248 OS=Mus musculus OX=10090 GN=Olfr1248 PE=4 SV=1	8.16	34.3	15.6352	1	1	0.125	0	2	0.0078125	-2	-0.0078125
A0A1L1SUG9	Cadherin EGF LAG seven-pass G-type receptor 3 OS=Mus musculus OX=10090 GN=Celsr3 PE=1 SV=1	6.62	359.1	1.81324	3	3	0.125	0	2	0.0078125	-2	-0.0078125
A0A1L1SV91	WD repeat-containing protein 82 OS=Mus musculus OX=10090 GN=Wdr82 PE=1 SV=1	4.78	7	62.9032	1	1	0.125	0	2	0.0078125	-2	-0.0078125
A0A1N9NPH8	Centrosomal protein of 295 kDa OS=Mus musculus OX=10090 GN=Cep295 PE=1 SV=1	6.14	278.1	1.34146	2	2	0.125	0	2	0.0078125	-2	-0.0078125
A0A1W2P820	Lipid droplet-associated hydrolase (Fragment) OS=Mus musculus OX=10090 GN=Ldah PE=1 SV=1	6.67	23.7	1.92308	1	1	0.125	0	2	0.0078125	-2	-0.0078125
A0A1Y7VP71	WD repeat-containing protein 25 (Fragment) OS=Mus musculus OX=10090 GN=Wdr25 PE=4 SV=1	5.49	15.2	21.5278	1	1	0.125	0	2	0.0078125	-2	-0.0078125
A0A2I3BQV5	Exportin-7 OS=Mus musculus OX=10090 GN=Xpo7 PE=1 SV=1	6.54	123.9	2.20588	1	1	0.125	0	2	0.0078125	-2	-0.0078125
A0A2I3BR72	Roundabout homolog 2 OS=Mus musculus OX=10090 GN=Robo2 PE=1 SV=1	6.34	165.7	1.85185	1	1	0.125	0	2	0.0078125	-2	-0.0078125
A0A2I3BRN2	G protein-regulated inducer of neurite outgrowth 2 OS=Mus musculus OX=10090 GN=Gprin2 PE=1 SV=1	6.4	47	7.03297	1	1	0.125	0	2	0.0078125	-2	-0.0078125
A0A2I3BRU1	Store-operated calcium entry regulator STIMATE OS=Mus musculus OX=10090 GN=Stimate PE=4 SV=1	6.77	7.3	6.94444	1	1	0.125	0	2	0.0078125	-2	-0.0078125
A0A2R8VJM7	Transmembrane protein 106C (Fragment) OS=Mus musculus OX=10090 GN=Tmem106c PE=1 SV=1	6.16	18.5	15.7576	1	1	0.125	0	2	0.0078125	-2	-0.0078125
A0A2R8W6Q5	Fibrous sheath-interacting protein 1 OS=Mus musculus OX=10090 GN=Fsip1 PE=1 SV=1	4.78	65.9	1.85497	1	1	0.125	0	2	0.0078125	-2	-0.0078125
A0A2U3TZ52	Protein Wnt OS=Mus musculus OX=10090 GN=Wnt7b PE=1 SV=1	9	40.1	7.02247	1	1	0.125	0	2	0.0078125	-2	-0.0078125
A0A338P6F7	Roundabout homolog 1 (Fragment) OS=Mus musculus OX=10090 GN=Robo1 PE=1 SV=1	5.94	177.2	2.40444	1	1	0.125	0	2	0.0078125	-2	-0.0078125
A0A338P6K9	Glutamine and serine-rich protein 1 OS=Mus musculus OX=10090 GN=Qser1 PE=2 SV=1	6.81	194.4	0.279642	1	1	0.125	0	2	0.0078125	-2	-0.0078125
A0A338P6Q3	RIKEN cDNA A630089N07 gene (Fragment) OS=Mus musculus OX=10090 GN=A630089N07Rik PE=1 SV=1	9.01	50.8	3.41686	1	1	0.125	0	2	0.0078125	-2	-0.0078125
A0A338P6S8	ABI family member 3-binding protein OS=Mus musculus OX=10090 GN=Abi3bp PE=1 SV=1	9.83	179.4	2.13806	1	1	0.125	0	2	0.0078125	-2	-0.0078125
A0A338P7G4	Transport and Golgi organization 2 homolog (Fragment) OS=Mus musculus OX=10090 GN=Tango2 PE=1 SV=1	6.04	21	12.1693	1	1	0.125	0	2	0.0078125	-2	-0.0078125
A0A3B2WCD2	Serine/threonine-protein kinase LMTK3 OS=Mus musculus OX=10090 GN=Lmtk3 PE=1 SV=1	6.04	153.2	0.829876	1	1	0.125	0	2	0.0078125	-2	-0.0078125
A0A3B2WCG9	Signal peptide, CUB and EGF-like domain-containing protein 3 OS=Mus musculus OX=10090 GN=Scube3 PE=1 SV=1	7.56	110.6	2.4777	1	1	0.125	0	2	0.0078125	-2	-0.0078125
A0A3Q4EG79	Vomeronasal 2, receptor 120 OS=Mus musculus OX=10090 GN=Vmn2r120 PE=4 SV=1	8.02	99.2	5.56818	1	1	0.125	0	2	0.0078125	-2	-0.0078125
A0A3Q4EGU3	E3 ubiquitin-protein ligase RNF8 OS=Mus musculus OX=10090 GN=Rnf8 PE=4 SV=1	11.74	14.4	10.1449	1	1	0.125	0	2	0.0078125	-2	-0.0078125
A0A494BA15	Glucosamine-6-phosphate isomerase 1 (Fragment) OS=Mus musculus OX=10090 GN=Gnpda1 PE=1 SV=1	9.04	5.3	56	1	1	0.125	0	2	0.0078125	-2	-0.0078125
A0A494BAM1	F-box only protein 15 OS=Mus musculus OX=10090 GN=Fbxo15 PE=4 SV=1	8.88	57.8	6.83594	2	2	0.125	0	2	0.0078125	-2	-0.0078125
A0A571BEG7	InaD-like protein OS=Mus musculus OX=10090 GN=Patj PE=1 SV=1	4.98	200.8	0.645856	1	1	0.125	0	2	0.0078125	-2	-0.0078125
A0A571BEV2	Predicted gene 8251 OS=Mus musculus OX=10090 GN=Gm8251 PE=4 SV=1	9.54	746.9	0.789074	3	2	0.125	0	2	0.0078125	-2	-0.0078125
A0A5F8MPF2	Tensin-3 OS=Mus musculus OX=10090 GN=Tns3 PE=1 SV=1	7.2	171.7	0.566394	1	1	0.125	0	2	0.0078125	-2	-0.0078125
A0A5F8MPH5	Synaptotagmin-like protein 2 OS=Mus musculus OX=10090 GN=Sytl2 PE=1 SV=1	6.02	239.2	1.53275	1	1	0.125	0	2	0.0078125	-2	-0.0078125
A0A5F8MPM5	Predicted gene 4125 OS=Mus musculus OX=10090 GN=Gm4125 PE=4 SV=1	9.11	30.6	15.8273	1	1	0.125	0	2	0.0078125	-2	-0.0078125
A0A5F8MPT2	Transmembrane protein 87B OS=Mus musculus OX=10090 GN=Tmem87b PE=1 SV=1	5.67	62.8	7.38739	1	1	0.125	0	2	0.0078125	-2	-0.0078125
A0A5F8MPU3	C2 calcium-dependent domain-containing 6 OS=Mus musculus OX=10090 GN=C2cd6 PE=4 SV=1	9.03	257.5	0.394391	1	1	0.125	0	2	0.0078125	-2	-0.0078125
A0A5F8MQ39	Histone acetyltransferase OS=Mus musculus OX=10090 GN=Kat6b PE=1 SV=1	6.7	228.2	0.389484	1	1	0.125	0	2	0.0078125	-2	-0.0078125
A0A5F8MQ99	Oxysterol-binding protein OS=Mus musculus OX=10090 GN=Osbpl10 PE=1 SV=1	6.23	41.2	4.50928	3	1	0.125	0	2	0.0078125	-2	-0.0078125
A0A5F8MQB6	Calcium-activated chloride channel regulator 4A OS=Mus musculus OX=10090 GN=Clca4a PE=1 SV=1	5.2	102	0.972973	1	1	0.125	0	2	0.0078125	-2	-0.0078125
A0A5K1VVQ7	Transcription factor 7 OS=Mus musculus OX=10090 GN=Tcf7 PE=1 SV=1	7.71	45.3	1.90931	1	1	0.125	0	2	0.0078125	-2	-0.0078125
A0A668KM31	Amphiphysin OS=Mus musculus OX=10090 GN=Amph PE=1 SV=1	4.59	89.8	0.97561	1	1	0.125	0	2	0.0078125	-2	-0.0078125
A0A668KM61	Anion exchange protein OS=Mus musculus OX=10090 GN=Slc4a4 PE=1 SV=1	6.9	125	0.360036	1	1	0.125	0	2	0.0078125	-2	-0.0078125
A0A6I8MX06	Predicted gene 10033 OS=Mus musculus OX=10090 GN=Gm10033 PE=4 SV=1	8.54	100.4	1.74825	1	1	0.125	0	2	0.0078125	-2	-0.0078125
A0A6I8MX18	Protein argonaute-1 OS=Mus musculus OX=10090 GN=Ago1 PE=1 SV=1	9.17	101.6	5.69832	2	1	0.125	0	2	0.0078125	-2	-0.0078125
A0A7N9VR94	AHNAK nucleoprotein 2 OS=Mus musculus OX=10090 GN=Ahnak2 PE=1 SV=1	5.88	368.2	1.19966	1	1	0.125	0	2	0.0078125	-2	-0.0078125
A0A7N9VSS4	Mucin-6 OS=Mus musculus OX=10090 GN=Muc6 PE=4 SV=1	7.24	515.5	0.744167	1	1	0.125	0	2	0.0078125	-2	-0.0078125
A0A803YV45	Transporter OS=Mus musculus OX=10090 GN=Slc6a20b PE=1 SV=1	5.81	70.6	6.14173	1	1	0.125	0	2	0.0078125	-2	-0.0078125
A1L317	Keratin, type I cytoskeletal 24 OS=Mus musculus OX=10090 GN=Krt24 PE=2 SV=2	5.01	54	9.96094	1	1	0.125	0	2	0.0078125	-2	-0.0078125
A2A863	Integrin beta-4 OS=Mus musculus OX=10090 GN=Itgb4 PE=1 SV=1	5.88	201.5	2.0352	2	1	0.125	0	2	0.0078125	-2	-0.0078125
A2ACV6	Protein SOGA1 OS=Mus musculus OX=10090 GN=Soga1 PE=1 SV=1	6.52	183	1.08827	1	1	0.125	0	2	0.0078125	-2	-0.0078125
A2AF53	Transmembrane protein 185A OS=Mus musculus OX=10090 GN=Tmem185a PE=1 SV=1	7.23	40.6	22	2	2	0.125	0	2	0.0078125	-2	-0.0078125
A2AFI6	Transmembrane 9 superfamily member OS=Mus musculus OX=10090 GN=Tm9sf5 PE=1 SV=1	6.48	77.2	7.30253	2	2	0.125	0	2	0.0078125	-2	-0.0078125
A2AGT5	Cytoskeleton-associated protein 5 OS=Mus musculus OX=10090 GN=Ckap5 PE=1 SV=1	7.96	225.5	0.541339	1	1	0.125	0	2	0.0078125	-2	-0.0078125
A2AKP6	Predicted gene 12394 OS=Mus musculus OX=10090 GN=Gm12394 PE=4 SV=1	8.48	109	1.83299	3	1	0.125	0	2	0.0078125	-2	-0.0078125
A2AM57	Inversin OS=Mus musculus OX=10090 GN=Invs PE=4 SV=1	9.17	117.1	2.82486	1	1	0.125	0	2	0.0078125	-2	-0.0078125
A2AP18	1-phosphatidylinositol 4,5-bisphosphate phosphodiesterase eta-2 OS=Mus musculus OX=10090 GN=Plch2 PE=1 SV=2	7.49	164.2	1.7988	1	1	0.125	0	2	0.0078125	-2	-0.0078125
A2APS1	Nephrocystin-1 OS=Mus musculus OX=10090 GN=Nphp1 PE=1 SV=1	5.17	77.4	3.90738	1	1	0.125	0	2	0.0078125	-2	-0.0078125
A2AQ19	RNA polymerase-associated protein RTF1 homolog OS=Mus musculus OX=10090 GN=Rtf1 PE=1 SV=1	8.16	80.7	3.91608	1	1	0.125	0	2	0.0078125	-2	-0.0078125
A2AQA1	Zinc finger protein 345 OS=Mus musculus OX=10090 GN=Zfp345 PE=2 SV=1	9.28	66	5.34759	2	2	0.125	0	2	0.0078125	-2	-0.0078125
A2AQH3	Homeodomain-interacting protein kinase 3 OS=Mus musculus OX=10090 GN=Hipk3 PE=1 SV=1	7.65	132.6	0.906843	2	1	0.125	0	2	0.0078125	-2	-0.0078125
A2ARD6	Kynureninase OS=Mus musculus OX=10090 GN=Kynu PE=1 SV=1	6.57	52.4	4.94624	2	1	0.125	0	2	0.0078125	-2	-0.0078125
A2ASZ8	Calcium-binding mitochondrial carrier protein SCaMC-2 OS=Mus musculus OX=10090 GN=Slc25a25 PE=1 SV=1	8.54	52.6	3.19829	1	1	0.125	0	2	0.0078125	-2	-0.0078125
A2BFF9	Cytoplasmic dynein 1 intermediate chain 2 OS=Mus musculus OX=10090 GN=Dync1i2 PE=1 SV=1	5.2	71.4	3.1348	1	1	0.125	0	2	0.0078125	-2	-0.0078125
A3KGW5	Inactive glycosyltransferase 25 family member 3 OS=Mus musculus OX=10090 GN=Cercam PE=3 SV=1	6.76	67.6	2.19595	1	1	0.125	0	2	0.0078125	-2	-0.0078125
A4QPC6	Butyrophilin subfamily 2 member A2 OS=Mus musculus OX=10090 GN=Btn2a2 PE=1 SV=1	5.9	58.4	7.00389	1	1	0.125	0	2	0.0078125	-2	-0.0078125
A5D6P6	Twist homolog 2 (Drosophila) OS=Mus musculus OX=10090 GN=Twist2 PE=1 SV=1	9.5	18.1	6.875	2	1	0.125	0	2	0.0078125	-2	-0.0078125
A7MCT6	Ethanolamine kinase 2 OS=Mus musculus OX=10090 GN=Etnk2 PE=1 SV=1	7.21	44.5	5.71429	1	1	0.125	0	2	0.0078125	-2	-0.0078125
B0QZL0	Netrin-1 (Fragment) OS=Mus musculus OX=10090 GN=Ntn1 PE=1 SV=1	7.87	17.4	11.3208	2	1	0.125	0	2	0.0078125	-2	-0.0078125
B1AQ85	Keratin-associated protein 4-2 OS=Mus musculus OX=10090 GN=Krtap4-2 PE=4 SV=1	7.9	17.5	17.9641	1	1	0.125	0	2	0.0078125	-2	-0.0078125
B1AQA0	Predicted gene 14180 OS=Mus musculus OX=10090 GN=Gm14180 PE=4 SV=1	5.47	2.5	100	1	1	0.125	0	2	0.0078125	-2	-0.0078125
B1AR51	Dynein, axonemal, heavy chain 9 OS=Mus musculus OX=10090 GN=Dnah9 PE=1 SV=1	5.91	512	0.646744	3	3	0.125	0	2	0.0078125	-2	-0.0078125
B1AS14	Prostamide/prostaglandin F synthase (Fragment) OS=Mus musculus OX=10090 GN=Prxl2b PE=1 SV=1	7.18	12.2	4.38596	1	1	0.125	0	2	0.0078125	-2	-0.0078125
B1ATC3	Trinucleotide repeat-containing gene 6C protein OS=Mus musculus OX=10090 GN=Tnrc6c PE=1 SV=1	7.17	198.1	1.15789	1	1	0.125	0	2	0.0078125	-2	-0.0078125
B1ATT4	Ras-related protein Rab-40B OS=Mus musculus OX=10090 GN=Rab40b PE=4 SV=1	9.88	31.2	2.86738	1	1	0.125	0	2	0.0078125	-2	-0.0078125
B1AX39	Zinc finger CCHC domain-containing protein 7 OS=Mus musculus OX=10090 GN=Zcchc7 PE=2 SV=1	8.62	63	5.91497	1	1	0.125	0	2	0.0078125	-2	-0.0078125
B2RPV6	Multimerin-1 OS=Mus musculus OX=10090 GN=Mmrn1 PE=1 SV=2	7.71	136	4.29752	2	2	0.125	0	2	0.0078125	-2	-0.0078125
B2RW88	Proline-rich protein 19 OS=Mus musculus OX=10090 GN=Prr19 PE=1 SV=1	9.85	40.1	4.64481	1	1	0.125	0	2	0.0078125	-2	-0.0078125
B2RXC1	Trafficking protein particle complex subunit 11 OS=Mus musculus OX=10090 GN=Trappc11 PE=1 SV=1	7.58	128.3	3.53045	1	1	0.125	0	2	0.0078125	-2	-0.0078125
B7ZBV4	Potassium voltage-gated channel subfamily KQT member 2 OS=Mus musculus OX=10090 GN=Kcnq2 PE=1 SV=1	9.72	84.4	1.05402	1	1	0.125	0	2	0.0078125	-2	-0.0078125
B8JJD7	Fanconi anemia, complementation group E (Fragment) OS=Mus musculus OX=10090 GN=Fance PE=4 SV=1	6.6	17.3	25.3247	1	1	0.125	0	2	0.0078125	-2	-0.0078125
B8JJM6	C3/C5 convertase OS=Mus musculus OX=10090 GN=Cfb PE=4 SV=1	7.85	79.6	3.64656	1	1	0.125	0	2	0.0078125	-2	-0.0078125
B9EJV3	GREB1-like protein OS=Mus musculus OX=10090 GN=Greb1l PE=2 SV=1	6.54	213.5	2.24778	1	1	0.125	0	2	0.0078125	-2	-0.0078125
D3YU89	Citron Rho-interacting kinase OS=Mus musculus OX=10090 GN=Cit PE=1 SV=1	6.6	236.9	0.724638	1	1	0.125	0	2	0.0078125	-2	-0.0078125
D3YUF4	Guanine nucleotide exchange factor DBS OS=Mus musculus OX=10090 GN=Mcf2l PE=1 SV=1	6.9	118.5	3.82409	1	1	0.125	0	2	0.0078125	-2	-0.0078125
D3YV59	Chordin-like protein 2 OS=Mus musculus OX=10090 GN=Chrdl2 PE=1 SV=1	7.46	48.6	9.69977	1	1	0.125	0	2	0.0078125	-2	-0.0078125
D3YWE6	Transcriptional activator MN1 OS=Mus musculus OX=10090 GN=Mn1 PE=2 SV=1	6.74	134	2.00463	1	1	0.125	0	2	0.0078125	-2	-0.0078125
D3YXG0	Hemicentin-1 OS=Mus musculus OX=10090 GN=Hmcn1 PE=1 SV=1	6.64	611.2	0.887469	3	3	0.125	0	2	0.0078125	-2	-0.0078125
D3YXJ0	Diacylglycerol kinase eta OS=Mus musculus OX=10090 GN=Dgkh PE=1 SV=2	6.52	134	0.412882	1	1	0.125	0	2	0.0078125	-2	-0.0078125
D3YZI9	PiggyBac transposable element-derived protein 5 OS=Mus musculus OX=10090 GN=Pgbd5 PE=1 SV=1	8.85	58.3	1.91205	2	1	0.125	0	2	0.0078125	-2	-0.0078125
D3Z234	Solute carrier family 15 member 5 (Fragment) OS=Mus musculus OX=10090 GN=Slc15a5 PE=3 SV=2	8.73	24.9	3.50877	1	1	0.125	0	2	0.0078125	-2	-0.0078125
D3Z3A8	Unconventional myosin-IXa OS=Mus musculus OX=10090 GN=Myo9a PE=1 SV=1	8.9	301.6	0.342075	1	1	0.125	0	2	0.0078125	-2	-0.0078125
D3Z440	COP9 signalosome complex subunit 7a (Fragment) OS=Mus musculus OX=10090 GN=Cops7a PE=1 SV=8	5.68	25	2.21239	1	1	0.125	0	2	0.0078125	-2	-0.0078125
D3Z6C4	3-oxoacyl-[acyl-carrier-protein] reductase (Fragment) OS=Mus musculus OX=10090 GN=Cbr4 PE=1 SV=1	7.37	15	19.5652	1	1	0.125	0	2	0.0078125	-2	-0.0078125
D3Z709	Disks large-associated protein 1 OS=Mus musculus OX=10090 GN=Dlgap1 PE=1 SV=1	6.77	105	1.69492	3	1	0.125	0	2	0.0078125	-2	-0.0078125
D4AFX7	DnaJ heat shock protein family (Hsp40) member C13 OS=Mus musculus OX=10090 GN=Dnajc13 PE=1 SV=1	6.77	254.9	1.64591	1	1	0.125	0	2	0.0078125	-2	-0.0078125
D6RFN8	Myotubularin-related protein 14 OS=Mus musculus OX=10090 GN=Mtmr14 PE=1 SV=1	8.57	15.6	2.85714	1	1	0.125	0	2	0.0078125	-2	-0.0078125
D6RHM9	Alpha-parvin OS=Mus musculus OX=10090 GN=Parva PE=1 SV=1	10.83	7.1	6.06061	1	1	0.125	0	2	0.0078125	-2	-0.0078125
D6RIP2	Diacylglycerol kinase zeta OS=Mus musculus OX=10090 GN=Dgkz PE=4 SV=1	12.21	10.2	35.1064	1	1	0.125	0	2	0.0078125	-2	-0.0078125
E0CXT7	Cleavage and polyadenylation specificity factor subunit 4 OS=Mus musculus OX=10090 GN=Cpsf4 PE=1 SV=1	8.31	30.2	8.55019	1	1	0.125	0	2	0.0078125	-2	-0.0078125
E0CYX6	Heparan sulfate 2-O-sulfotransferase 1 OS=Mus musculus OX=10090 GN=Hs2st1 PE=4 SV=1	4.78	8.3	37.3333	1	1	0.125	0	2	0.0078125	-2	-0.0078125
E9PUR0	Ankyrin repeat and KH domain-containing 1 OS=Mus musculus OX=10090 GN=Ankhd1 PE=1 SV=1	5.87	269.5	1.05965	1	1	0.125	0	2	0.0078125	-2	-0.0078125
E9PUZ9	PDZ domain-containing RING finger 4 OS=Mus musculus OX=10090 GN=Pdzrn4 PE=1 SV=1	5.68	114	1.08481	1	1	0.125	0	2	0.0078125	-2	-0.0078125
E9PVJ7	Olfactory receptor OS=Mus musculus OX=10090 GN=Olfr247 PE=3 SV=2	7.72	35.8	13.4375	1	1	0.125	0	2	0.0078125	-2	-0.0078125
E9PXJ4	Zinc finger protein 712 OS=Mus musculus OX=10090 GN=Zfp712 PE=4 SV=1	8.9	81.6	6.66667	1	1	0.125	0	2	0.0078125	-2	-0.0078125
E9PXN7	UDP-glucuronosyltransferase OS=Mus musculus OX=10090 GN=Ugt1a10 PE=1 SV=1	8.35	60.3	3.77358	1	1	0.125	0	2	0.0078125	-2	-0.0078125
E9PXU2	Disintegrin and metalloproteinase domain-containing protein 17 OS=Mus musculus OX=10090 GN=Adam17 PE=1 SV=1	5.88	95.2	1.41844	1	1	0.125	0	2	0.0078125	-2	-0.0078125
E9PXZ7	Integrin alpha-D OS=Mus musculus OX=10090 GN=Itgad PE=1 SV=1	6.73	131.6	2.32945	1	1	0.125	0	2	0.0078125	-2	-0.0078125
E9PY61	G protein-coupled receptor 179 OS=Mus musculus OX=10090 GN=Gpr179 PE=3 SV=1	5.55	248.6	2.18055	2	2	0.125	0	2	0.0078125	-2	-0.0078125
E9PYR6	Otoferlin OS=Mus musculus OX=10090 GN=Otof PE=4 SV=1	5.74	226.9	0.650976	1	1	0.125	0	2	0.0078125	-2	-0.0078125
E9PZ81	Lysine-specific demethylase hairless OS=Mus musculus OX=10090 GN=Hr PE=4 SV=1	7.46	130.2	0.743187	1	1	0.125	0	2	0.0078125	-2	-0.0078125
E9PZ87	Pappalysin 2 OS=Mus musculus OX=10090 GN=Pappa2 PE=1 SV=1	5.35	198.7	2.12409	1	1	0.125	0	2	0.0078125	-2	-0.0078125
E9PZP8	HECT and RLD domain-containing E3 ubiquitin protein ligase family member 1 OS=Mus musculus OX=10090 GN=Herc1 PE=1 SV=1	6.04	532.3	0.57625	2	2	0.125	0	2	0.0078125	-2	-0.0078125
E9PZW7	Inhibitory synaptic factor 2A OS=Mus musculus OX=10090 GN=Insyn2a PE=1 SV=1	7.74	51.8	2.55319	1	1	0.125	0	2	0.0078125	-2	-0.0078125
E9Q0A3	Rho guanine nucleotide exchange factor (GEF) 11 (Fragment) OS=Mus musculus OX=10090 GN=Arhgef11 PE=1 SV=8	5.78	163.4	1.01695	1	1	0.125	0	2	0.0078125	-2	-0.0078125
E9Q0J5	Kinesin-like protein KIF21A OS=Mus musculus OX=10090 GN=Kif21a PE=1 SV=2	6.47	186.5	1.43541	1	1	0.125	0	2	0.0078125	-2	-0.0078125
E9Q1M1	PDZ domain-containing 2 OS=Mus musculus OX=10090 GN=Pdzd2 PE=1 SV=1	7.65	296.5	0.965665	1	1	0.125	0	2	0.0078125	-2	-0.0078125
E9Q281	Vomeronasal 2, receptor 114 OS=Mus musculus OX=10090 GN=Vmn2r114 PE=4 SV=1	7.55	97.6	3.97196	1	1	0.125	0	2	0.0078125	-2	-0.0078125
E9Q2E4	HECT domain E3 ubiquitin protein ligase 4 OS=Mus musculus OX=10090 GN=Hectd4 PE=1 SV=2	6.06	483.8	0.520598	1	1	0.125	0	2	0.0078125	-2	-0.0078125
E9Q2I1	Chloride channel protein OS=Mus musculus OX=10090 GN=Clcn3 PE=1 SV=1	6.79	93.6	4.5292	1	1	0.125	0	2	0.0078125	-2	-0.0078125
E9Q3M9	Capping protein-inhibiting regulator of actin-like OS=Mus musculus OX=10090 GN=Cracdl PE=1 SV=1	7.37	125.8	3.48936	1	1	0.125	0	2	0.0078125	-2	-0.0078125
E9Q401	Ryanodine receptor 2 OS=Mus musculus OX=10090 GN=Ryr2 PE=1 SV=1	6.09	564.5	0.362465	1	1	0.125	0	2	0.0078125	-2	-0.0078125
E9Q4M0	Transmembrane protein 44 OS=Mus musculus OX=10090 GN=Tmem44 PE=1 SV=1	8.18	47.7	6.46651	1	1	0.125	0	2	0.0078125	-2	-0.0078125
E9Q5R8	T-box transcription factor TBX22 OS=Mus musculus OX=10090 GN=Tbx22 PE=4 SV=1	6.39	59.8	4.14313	1	1	0.125	0	2	0.0078125	-2	-0.0078125
E9Q634	Unconventional myosin-Ie OS=Mus musculus OX=10090 GN=Myo1e PE=1 SV=1	9.07	126.7	2.8907	3	3	0.125	0	2	0.0078125	-2	-0.0078125
E9Q6C1	Oxysterol-binding protein OS=Mus musculus OX=10090 GN=Osbpl9 PE=1 SV=1	5.96	73.9	3.04878	1	1	0.125	0	2	0.0078125	-2	-0.0078125
E9Q6G4	ATP-binding cassette sub-family A member 7 OS=Mus musculus OX=10090 GN=Abca7 PE=1 SV=1	7.28	237.6	1.19982	1	1	0.125	0	2	0.0078125	-2	-0.0078125
E9Q6H8	Pleckstrin homology domain-containing, family A member 5 OS=Mus musculus OX=10090 GN=Plekha5 PE=1 SV=1	7.39	144.3	1.33964	1	1	0.125	0	2	0.0078125	-2	-0.0078125
E9Q6Y4	Zinc finger protein 94 OS=Mus musculus OX=10090 GN=Zfp94 PE=4 SV=1	8.18	55.5	7.40741	1	1	0.125	0	2	0.0078125	-2	-0.0078125
E9Q816	Cytochrome P450 2W1 OS=Mus musculus OX=10090 GN=Cyp2w1 PE=2 SV=1	9.14	54.4	8.31643	1	1	0.125	0	2	0.0078125	-2	-0.0078125
E9Q8I9	Protein furry homolog OS=Mus musculus OX=10090 GN=Fry PE=1 SV=1	6.01	338.9	2.54967	2	2	0.125	0	2	0.0078125	-2	-0.0078125
E9Q9K5	Triadin OS=Mus musculus OX=10090 GN=Trdn PE=1 SV=1	9.32	77.8	2.7417	2	2	0.125	0	2	0.0078125	-2	-0.0078125
E9Q9L6	Neurobeachin-like protein 2 OS=Mus musculus OX=10090 GN=Nbeal2 PE=1 SV=1	6.42	302.6	0.181818	1	1	0.125	0	2	0.0078125	-2	-0.0078125
E9QA35	Spermatogenesis-associated 31 subfamily D, member 1A OS=Mus musculus OX=10090 GN=Spata31d1a PE=4 SV=1	8.7	144.8	5.16467	2	1	0.125	0	2	0.0078125	-2	-0.0078125
E9QA57	Spermatogenesis-associated 31 subfamily D, member 1B OS=Mus musculus OX=10090 GN=Spata31d1b PE=4 SV=1	8.72	149.6	3.74724	2	1	0.125	0	2	0.0078125	-2	-0.0078125
E9QAD8	IQ motif and SEC7 domain-containing protein 2 OS=Mus musculus OX=10090 GN=Iqsec2 PE=1 SV=1	8.56	162.7	0.739247	1	1	0.125	0	2	0.0078125	-2	-0.0078125
E9QAF0	Spermatogenesis-associated protein 31 OS=Mus musculus OX=10090 GN=Spata31 PE=1 SV=1	9.63	115.8	0.493097	1	1	0.125	0	2	0.0078125	-2	-0.0078125
E9QAQ8	Mucin 5, subtypes A and C, tracheobronchial/gastric OS=Mus musculus OX=10090 GN=Muc5ac PE=1 SV=5	5.94	371.9	3.06802	3	3	0.125	0	2	0.0078125	-2	-0.0078125
E9QAR1	Zinc finger protein 384 OS=Mus musculus OX=10090 GN=Zfp384 PE=1 SV=1	8.44	59.4	9.56679	1	1	0.125	0	2	0.0078125	-2	-0.0078125
E9QAT7	Olfactory receptor OS=Mus musculus OX=10090 GN=Olfr173 PE=3 SV=1	7.9	36.7	14.6417	1	1	0.125	0	2	0.0078125	-2	-0.0078125
E9QLN8	Ribonuclease H1 OS=Mus musculus OX=10090 GN=Rnaseh1 PE=1 SV=1	9.29	31.8	8.07018	1	1	0.125	0	2	0.0078125	-2	-0.0078125
E9QLU4	Tetratricopeptide repeat protein 29 OS=Mus musculus OX=10090 GN=Ttc29 PE=1 SV=1	5.53	54.3	4.67091	1	1	0.125	0	2	0.0078125	-2	-0.0078125
E9QN31	Probable 28S rRNA (cytosine-C(5))-methyltransferase OS=Mus musculus OX=10090 GN=Nop2 PE=1 SV=1	9.19	86.9	2.01511	1	1	0.125	0	2	0.0078125	-2	-0.0078125
E9QN70	Laminin subunit beta-1 OS=Mus musculus OX=10090 GN=Lamb1 PE=1 SV=1	5.01	202.3	2.1265	1	1	0.125	0	2	0.0078125	-2	-0.0078125
E9QNV2	Mediator complex subunit 23 OS=Mus musculus OX=10090 GN=Med23 PE=1 SV=1	7.31	157	2.39826	2	2	0.125	0	2	0.0078125	-2	-0.0078125
F6QFD1	Phosphodiesterase (Fragment) OS=Mus musculus OX=10090 GN=Pde4d PE=1 SV=1	5.25	85.5	1.19363	2	1	0.125	0	2	0.0078125	-2	-0.0078125
F6T1I5	Histocompatibility 2, T region locus 10 OS=Mus musculus OX=10090 GN=H2-T10 PE=3 SV=1	5.81	43.2	5.5409	1	1	0.125	0	2	0.0078125	-2	-0.0078125
F6TJX7	Obscurin (Fragment) OS=Mus musculus OX=10090 GN=Obscn PE=1 SV=2	5.38	99.8	4.44204	1	1	0.125	0	2	0.0078125	-2	-0.0078125
F6UUZ3	Diacylglycerol kinase OS=Mus musculus OX=10090 GN=Dgkk PE=3 SV=2	5.14	149.5	6	3	3	0.125	0	2	0.0078125	-2	-0.0078125
F6VW20	Tetraspanin-17 (Fragment) OS=Mus musculus OX=10090 GN=Tspan17 PE=3 SV=1	5.25	20.6	19.2513	1	1	0.125	0	2	0.0078125	-2	-0.0078125
F6WZN3	Coatomer subunit zeta-2 (Fragment) OS=Mus musculus OX=10090 GN=Copz2 PE=4 SV=1	5.82	6	56.8627	1	1	0.125	0	2	0.0078125	-2	-0.0078125
F6ZHM5	Predicted gene 10130 OS=Mus musculus OX=10090 GN=Gm10130 PE=1 SV=1	6.14	11.6	27.7228	1	1	0.125	0	2	0.0078125	-2	-0.0078125
F7B603	Versican core protein (Fragment) OS=Mus musculus OX=10090 GN=Vcan PE=1 SV=1	9.09	16.7	14.8936	1	1	0.125	0	2	0.0078125	-2	-0.0078125
F7C376	Voltage-dependent L-type calcium channel subunit alpha OS=Mus musculus OX=10090 GN=Cacna1c PE=1 SV=2	7.2	248.7	1.53015	2	1	0.125	0	2	0.0078125	-2	-0.0078125
F8VPN7	Dedicator of cytokinesis protein 9 OS=Mus musculus OX=10090 GN=Dock9 PE=1 SV=1	7.43	241.2	3.36015	3	3	0.125	0	2	0.0078125	-2	-0.0078125
F8VQ29	IQ motif-containing GTPase-activating protein 3 OS=Mus musculus OX=10090 GN=Iqgap3 PE=1 SV=1	7.52	185.2	1.47059	1	1	0.125	0	2	0.0078125	-2	-0.0078125
F8VQ87	5'-3' exoribonuclease 1 OS=Mus musculus OX=10090 GN=Xrn1 PE=1 SV=1	7.62	194.6	1.2188	1	1	0.125	0	2	0.0078125	-2	-0.0078125
F8WGX5	DmX-like protein 1 OS=Mus musculus OX=10090 GN=Dmxl1 PE=1 SV=1	6.42	337.2	1.52066	1	1	0.125	0	2	0.0078125	-2	-0.0078125
F8WI80	Adenosine deaminase domain-containing protein 1 OS=Mus musculus OX=10090 GN=Adad1 PE=1 SV=1	8.56	60.2	6.20438	1	1	0.125	0	2	0.0078125	-2	-0.0078125
G3UWA8	Pyroglutamylated RFamide peptide receptor-like OS=Mus musculus OX=10090 GN=Qrfprl PE=3 SV=1	9.48	47.4	6.97115	1	1	0.125	0	2	0.0078125	-2	-0.0078125
G3UWN6	E3 ubiquitin-protein ligase ZNRF1 (Fragment) OS=Mus musculus OX=10090 GN=Znrf1 PE=1 SV=1	5.87	4.6	60.9756	1	1	0.125	0	2	0.0078125	-2	-0.0078125
G3UX45	URB2 ribosome biogenesis 2 homolog (S. cerevisiae) OS=Mus musculus OX=10090 GN=Urb2 PE=1 SV=1	7.27	145.6	0.848765	1	1	0.125	0	2	0.0078125	-2	-0.0078125
G3UXC7	ADAMTS-like 3 OS=Mus musculus OX=10090 GN=Adamtsl3 PE=1 SV=1	8.1	189.6	1.4068	1	1	0.125	0	2	0.0078125	-2	-0.0078125
G3UY69	F-box only protein 44 OS=Mus musculus OX=10090 GN=Fbxo44 PE=1 SV=1	5.02	15.5	14.2857	1	1	0.125	0	2	0.0078125	-2	-0.0078125
G3UY79	Ankyrin repeat domain-containing protein 11 OS=Mus musculus OX=10090 GN=Ankrd11 PE=1 SV=1	9.26	10.6	4.12371	1	1	0.125	0	2	0.0078125	-2	-0.0078125
G3UYW1	WD repeat and FYVE domain-containing protein 3 OS=Mus musculus OX=10090 GN=Wdfy3 PE=1 SV=1	6.77	394	0.425411	1	1	0.125	0	2	0.0078125	-2	-0.0078125
G3UZM1	Probable JmjC domain-containing histone demethylation protein 2C OS=Mus musculus OX=10090 GN=Jmjd1c PE=1 SV=1	7.88	281.4	2.52864	2	2	0.125	0	2	0.0078125	-2	-0.0078125
G3X8R5	Transcriptional regulator QRICH1 OS=Mus musculus OX=10090 GN=Qrich1 PE=1 SV=1	5.87	86.5	2.7027	1	1	0.125	0	2	0.0078125	-2	-0.0078125
G3X9Q6	La-related protein 4 OS=Mus musculus OX=10090 GN=Larp4 PE=1 SV=1	6.51	79.7	3.61613	1	1	0.125	0	2	0.0078125	-2	-0.0078125
G3X9Y5	Ubiquitin conjugation factor E4 A OS=Mus musculus OX=10090 GN=Ube4a PE=1 SV=1	5.19	124.4	0.737327	1	1	0.125	0	2	0.0078125	-2	-0.0078125
G3XA59	Transforming growth factor beta activator LRRC32 OS=Mus musculus OX=10090 GN=Lrrc32 PE=1 SV=1	5.99	72.4	3.01659	1	1	0.125	0	2	0.0078125	-2	-0.0078125
G5DDB7	Phosphoinositide phospholipase C OS=Mus musculus OX=10090 GN=Plcd1 PE=1 SV=1	6.65	88.8	4.98721	2	1	0.125	0	2	0.0078125	-2	-0.0078125
G5E8T2	RING-type E3 ubiquitin transferase OS=Mus musculus OX=10090 GN=Ttc3 PE=1 SV=1	6.25	223.8	1.01061	1	1	0.125	0	2	0.0078125	-2	-0.0078125
H3BJ88	Vomeronasal 2, receptor 3 OS=Mus musculus OX=10090 GN=Vmn2r3 PE=4 SV=2	7.65	103.2	2.09021	1	1	0.125	0	2	0.0078125	-2	-0.0078125
H3BJQ8	Glypican-5 OS=Mus musculus OX=10090 GN=Gpc5 PE=1 SV=1	7.33	71.3	4.49612	1	1	0.125	0	2	0.0078125	-2	-0.0078125
H3BJX2	DNA excision repair protein ERCC-1 (Fragment) OS=Mus musculus OX=10090 GN=Ercc1 PE=4 SV=1	8	4	48.6486	1	1	0.125	0	2	0.0078125	-2	-0.0078125
H3BKQ0	Rho guanine nucleotide exchange factor 6 (Fragment) OS=Mus musculus OX=10090 GN=Arhgef6 PE=1 SV=1	8.35	28.1	2	2	1	0.125	0	2	0.0078125	-2	-0.0078125
I7HJS4	Tissue-resident T-cell transcription regulator protein ZNF683 OS=Mus musculus OX=10090 GN=Znf683 PE=2 SV=1	8.92	50.4	1.96507	2	1	0.125	0	2	0.0078125	-2	-0.0078125
J3JS82	Transmembrane and coiled-coil domain-containing protein 2 OS=Mus musculus OX=10090 GN=Tmco2 PE=1 SV=1	8.46	20.8	14.9733	1	1	0.125	0	2	0.0078125	-2	-0.0078125
J3QJV4	Predicted gene, 19402 OS=Mus musculus OX=10090 GN=Gm19402 PE=4 SV=1	7.08	27.2	10.1504	1	1	0.125	0	2	0.0078125	-2	-0.0078125
J3QNS5	Major facilitator superfamily domain-containing 4B4 OS=Mus musculus OX=10090 GN=Mfsd4b4 PE=4 SV=1	5.14	54.6	10.5368	1	1	0.125	0	2	0.0078125	-2	-0.0078125
J3QPU5	Coiled-coil glutamate-rich protein 2 OS=Mus musculus OX=10090 GN=Ccer2 PE=4 SV=1	4.91	30.7	1.82482	1	1	0.125	0	2	0.0078125	-2	-0.0078125
K7N6G4	Predicted gene 16434 OS=Mus musculus OX=10090 GN=Gm16434 PE=4 SV=1	8.69	24.2	12.1951	1	1	0.125	0	2	0.0078125	-2	-0.0078125
K7N712	Vomeronasal 2, receptor 62 OS=Mus musculus OX=10090 GN=Vmn2r62 PE=4 SV=1	6.4	97.9	2.91036	1	1	0.125	0	2	0.0078125	-2	-0.0078125
L7N1X2	Vomeronasal 2, receptor 13 OS=Mus musculus OX=10090 GN=Vmn2r13 PE=4 SV=1	7.21	94.1	4.81348	1	1	0.125	0	2	0.0078125	-2	-0.0078125
L7N2C7	Predicted gene 8122 (Fragment) OS=Mus musculus OX=10090 GN=Gm8122 PE=4 SV=1	7.91	24.6	8.4507	1	1	0.125	0	2	0.0078125	-2	-0.0078125
L7N472	Vomeronasal 2, receptor 8 OS=Mus musculus OX=10090 GN=Vmn2r8 PE=4 SV=1	6.52	97.1	4.59906	1	1	0.125	0	2	0.0078125	-2	-0.0078125
O08529	Calpain-2 catalytic subunit OS=Mus musculus OX=10090 GN=Capn2 PE=1 SV=4	4.96	79.8	2.14286	1	1	0.125	0	2	0.0078125	-2	-0.0078125
O08605	MAP kinase-interacting serine/threonine-protein kinase 1 OS=Mus musculus OX=10090 GN=Mknk1 PE=1 SV=2	6.96	47.9	10.0703	1	1	0.125	0	2	0.0078125	-2	-0.0078125
O08689	Growth/differentiation factor 8 OS=Mus musculus OX=10090 GN=Mstn PE=1 SV=1	7.01	42.9	6.64894	1	1	0.125	0	2	0.0078125	-2	-0.0078125
O08710	Thyroglobulin OS=Mus musculus OX=10090 GN=Tg PE=1 SV=3	5.49	304.3	0.939986	1	1	0.125	0	2	0.0078125	-2	-0.0078125
O08796	Eukaryotic elongation factor 2 kinase OS=Mus musculus OX=10090 GN=Eef2k PE=1 SV=1	5.38	81.7	0.690608	1	1	0.125	0	2	0.0078125	-2	-0.0078125
O08999	Latent-transforming growth factor beta-binding protein 2 OS=Mus musculus OX=10090 GN=Ltbp2 PE=1 SV=2	5.29	195.7	2.48207	2	2	0.125	0	2	0.0078125	-2	-0.0078125
O35126	Atrophin-1 OS=Mus musculus OX=10090 GN=Atn1 PE=1 SV=1	8.95	123.6	0.595745	1	1	0.125	0	2	0.0078125	-2	-0.0078125
O35526	Syntaxin-1A OS=Mus musculus OX=10090 GN=Stx1a PE=1 SV=3	5.24	33	7.63889	2	1	0.125	0	2	0.0078125	-2	-0.0078125
O54956	DNA polymerase epsilon subunit 2 OS=Mus musculus OX=10090 GN=Pole2 PE=2 SV=2	6.25	59.3	3.98482	1	1	0.125	0	2	0.0078125	-2	-0.0078125
O54992	MAP kinase-activated protein kinase 5 OS=Mus musculus OX=10090 GN=Mapkapk5 PE=1 SV=1	7.59	54.1	1.2685	1	1	0.125	0	2	0.0078125	-2	-0.0078125
O88379	Bromodomain adjacent to zinc finger domain protein 1A OS=Mus musculus OX=10090 GN=Baz1a PE=1 SV=3	6.54	178.3	0.707395	1	1	0.125	0	2	0.0078125	-2	-0.0078125
O88824	Protein JTB OS=Mus musculus OX=10090 GN=Jtb PE=1 SV=1	8.19	16.3	14.3836	1	1	0.125	0	2	0.0078125	-2	-0.0078125
O88839	Disintegrin and metalloproteinase domain-containing protein 15 OS=Mus musculus OX=10090 GN=Adam15 PE=1 SV=2	6.54	92.6	4.51389	1	1	0.125	0	2	0.0078125	-2	-0.0078125
O88983	Syntaxin-8 OS=Mus musculus OX=10090 GN=Stx8 PE=1 SV=1	5.01	26.9	4.23729	1	1	0.125	0	2	0.0078125	-2	-0.0078125
O88995	NF-kappa-B inhibitor-like protein 1 OS=Mus musculus OX=10090 GN=Nfkbil1 PE=2 SV=1	7.34	43.2	6.82415	1	1	0.125	0	2	0.0078125	-2	-0.0078125
P01628	Ig kappa chain V-II region MOPC 511 OS=Mus musculus OX=10090 PE=1 SV=1	7.94	12.5	23.8938	1	1	0.125	0	2	0.0078125	-2	-0.0078125
P01921	H-2 class II histocompatibility antigen, A-D beta chain OS=Mus musculus OX=10090 GN=H2-Ab1 PE=1 SV=1	7.83	29.9	9.0566	1	1	0.125	0	2	0.0078125	-2	-0.0078125
P02798	Metallothionein-2 OS=Mus musculus OX=10090 GN=Mt2 PE=1 SV=2	7.83	6.1	52.459	2	2	0.125	0	2	0.0078125	-2	-0.0078125
P07742	Ribonucleoside-diphosphate reductase large subunit OS=Mus musculus OX=10090 GN=Rrm1 PE=1 SV=2	6.7	90.2	1.64141	2	1	0.125	0	2	0.0078125	-2	-0.0078125
P08032	Spectrin alpha chain, erythrocytic 1 OS=Mus musculus OX=10090 GN=Spta1 PE=1 SV=3	5.03	279.7	0.372671	1	1	0.125	0	2	0.0078125	-2	-0.0078125
P08122	Collagen alpha-2(IV) chain OS=Mus musculus OX=10090 GN=Col4a2 PE=1 SV=4	8.48	167.2	1.17165	1	2	0.125	0	2	0.0078125	-2	-0.0078125
P08607	C4b-binding protein OS=Mus musculus OX=10090 GN=C4bpa PE=1 SV=3	7.15	51.5	1.0661	1	1	0.125	0	2	0.0078125	-2	-0.0078125
P09926	Surfeit locus protein 2 OS=Mus musculus OX=10090 GN=Surf2 PE=1 SV=1	9.23	30.3	2.72374	1	1	0.125	0	2	0.0078125	-2	-0.0078125
P0C5E4	Phosphatidylinositol phosphatase PTPRQ OS=Mus musculus OX=10090 GN=Ptprq PE=1 SV=1	5.8	256.6	1.56522	1	1	0.125	0	2	0.0078125	-2	-0.0078125
P10287	Cadherin-3 OS=Mus musculus OX=10090 GN=Cdh3 PE=1 SV=2	4.79	90.6	3.40633	1	1	0.125	0	2	0.0078125	-2	-0.0078125
P11983	T-complex protein 1 subunit alpha OS=Mus musculus OX=10090 GN=Tcp1 PE=1 SV=3	6.16	60.4	1.43885	2	1	0.125	0	2	0.0078125	-2	-0.0078125
P12657	Muscarinic acetylcholine receptor M1 OS=Mus musculus OX=10090 GN=Chrm1 PE=1 SV=2	9.32	51.3	4.34783	1	1	0.125	0	2	0.0078125	-2	-0.0078125
P16460	Argininosuccinate synthase OS=Mus musculus OX=10090 GN=Ass1 PE=1 SV=1	8.22	46.6	1.69903	2	1	0.125	0	2	0.0078125	-2	-0.0078125
P19137	Laminin subunit alpha-1 OS=Mus musculus OX=10090 GN=Lama1 PE=1 SV=2	6.71	337.9	2.10834	2	2	0.125	0	2	0.0078125	-2	-0.0078125
P20334	Tumor necrosis factor receptor superfamily member 9 OS=Mus musculus OX=10090 GN=Tnfrsf9 PE=1 SV=1	7.85	27.6	10.9375	1	1	0.125	0	2	0.0078125	-2	-0.0078125
P20863	Embryonic growth/differentiation factor 1 OS=Mus musculus OX=10090 GN=Gdf1 PE=2 SV=2	7.93	38.6	11.2045	1	1	0.125	0	2	0.0078125	-2	-0.0078125
P20918	Plasminogen OS=Mus musculus OX=10090 GN=Plg PE=1 SV=3	6.6	90.7	5.91133	2	2	0.125	0	2	0.0078125	-2	-0.0078125
P26687	Twist-related protein 1 OS=Mus musculus OX=10090 GN=Twist1 PE=1 SV=1	9.57	21.2	21.3592	1	1	0.125	0	2	0.0078125	-2	-0.0078125
P27040	Activin receptor type-2B OS=Mus musculus OX=10090 GN=Acvr2b PE=1 SV=1	5.96	60.5	7.46269	1	1	0.125	0	2	0.0078125	-2	-0.0078125
P27671	Ras-specific guanine nucleotide-releasing factor 1 OS=Mus musculus OX=10090 GN=Rasgrf1 PE=1 SV=2	7.17	144	0.950872	1	1	0.125	0	2	0.0078125	-2	-0.0078125
P28662	Brain protein I3 OS=Mus musculus OX=10090 GN=Bri3 PE=2 SV=2	8.41	13.6	44	1	1	0.125	0	2	0.0078125	-2	-0.0078125
P34968	5-hydroxytryptamine receptor 2C OS=Mus musculus OX=10090 GN=Htr2c PE=2 SV=2	9.31	51.9	0.87146	1	1	0.125	0	2	0.0078125	-2	-0.0078125
P35951	Low-density lipoprotein receptor OS=Mus musculus OX=10090 GN=Ldlr PE=1 SV=2	5.02	94.9	3.01624	1	1	0.125	0	2	0.0078125	-2	-0.0078125
P40240	CD9 antigen OS=Mus musculus OX=10090 GN=Cd9 PE=1 SV=2	7.23	25.2	4.86726	1	1	0.125	0	2	0.0078125	-2	-0.0078125
P42227	Signal transducer and activator of transcription 3 OS=Mus musculus OX=10090 GN=Stat3 PE=1 SV=2	6.3	88	5.32468	1	1	0.125	0	2	0.0078125	-2	-0.0078125
P42337	Phosphatidylinositol 4,5-bisphosphate 3-kinase catalytic subunit alpha isoform OS=Mus musculus OX=10090 GN=Pik3ca PE=1 SV=2	7.15	124.3	2.62172	1	1	0.125	0	2	0.0078125	-2	-0.0078125
P45952	Medium-chain specific acyl-CoA dehydrogenase, mitochondrial OS=Mus musculus OX=10090 GN=Acadm PE=1 SV=1	8.37	46.5	2.13777	1	1	0.125	0	2	0.0078125	-2	-0.0078125
P46414	Cyclin-dependent kinase inhibitor 1B OS=Mus musculus OX=10090 GN=Cdkn1b PE=1 SV=2	7.02	22.2	7.61421	1	1	0.125	0	2	0.0078125	-2	-0.0078125
P47941	Crk-like protein OS=Mus musculus OX=10090 GN=Crkl PE=1 SV=2	6.74	33.8	5.61056	1	1	0.125	0	2	0.0078125	-2	-0.0078125
P47945	Metallothionein-4 OS=Mus musculus OX=10090 GN=Mt4 PE=2 SV=1	7.84	6.3	45.1613	1	1	0.125	0	2	0.0078125	-2	-0.0078125
P48615	Protein Wnt-11 OS=Mus musculus OX=10090 GN=Wnt11 PE=2 SV=1	8.79	39.1	7.62712	2	1	0.125	0	2	0.0078125	-2	-0.0078125
P49681	Neuropeptides B/W receptor type 1 OS=Mus musculus OX=10090 GN=Npbwr1 PE=3 SV=2	8.78	36.1	13.3739	1	1	0.125	0	2	0.0078125	-2	-0.0078125
P51612	DNA repair protein complementing XP-C cells homolog OS=Mus musculus OX=10090 GN=Xpc PE=1 SV=2	8.81	104.5	3.54839	1	1	0.125	0	2	0.0078125	-2	-0.0078125
P53996	CCHC-type zinc finger nucleic acid binding protein OS=Mus musculus OX=10090 GN=Cnbp PE=1 SV=2	7.58	19.6	8.42697	1	1	0.125	0	2	0.0078125	-2	-0.0078125
P54830	Tyrosine-protein phosphatase non-receptor type 5 OS=Mus musculus OX=10090 GN=Ptpn5 PE=1 SV=2	5.2	60.8	1.47874	2	1	0.125	0	2	0.0078125	-2	-0.0078125
P54869	Hydroxymethylglutaryl-CoA synthase, mitochondrial OS=Mus musculus OX=10090 GN=Hmgcs2 PE=1 SV=2	8.41	56.8	4.92126	1	1	0.125	0	2	0.0078125	-2	-0.0078125
P55200	Histone-lysine N-methyltransferase 2A OS=Mus musculus OX=10090 GN=Kmt2a PE=1 SV=3	9.16	429.4	0.75643	1	1	0.125	0	2	0.0078125	-2	-0.0078125
P56695	Wolframin OS=Mus musculus OX=10090 GN=Wfs1 PE=1 SV=1	7.97	100.5	7.41573	2	2	0.125	0	2	0.0078125	-2	-0.0078125
P56716	Oxygen-regulated protein 1 OS=Mus musculus OX=10090 GN=Rp1 PE=1 SV=2	7.53	234.2	2.05251	3	2	0.125	0	2	0.0078125	-2	-0.0078125
P56983	Transmembrane protein 14A OS=Mus musculus OX=10090 GN=Tmem14a PE=3 SV=2	11.03	10.6	27.2727	1	1	0.125	0	2	0.0078125	-2	-0.0078125
P58022	Lysyl oxidase homolog 2 OS=Mus musculus OX=10090 GN=Loxl2 PE=1 SV=2	6.57	86.9	4.76804	1	1	0.125	0	2	0.0078125	-2	-0.0078125
P58058	NAD kinase OS=Mus musculus OX=10090 GN=Nadk PE=1 SV=2	6.52	48.6	7.28929	1	1	0.125	0	2	0.0078125	-2	-0.0078125
P58682	Toll-like receptor 8 OS=Mus musculus OX=10090 GN=Tlr8 PE=1 SV=2	7.31	119.3	2.51938	1	1	0.125	0	2	0.0078125	-2	-0.0078125
P59054	Cysteine/serine-rich nuclear protein 1 OS=Mus musculus OX=10090 GN=Csrnp1 PE=2 SV=1	4.74	62.5	3.94511	1	1	0.125	0	2	0.0078125	-2	-0.0078125
P60853	Leucine zipper putative tumor suppressor 1 OS=Mus musculus OX=10090 GN=Lzts1 PE=2 SV=3	7.56	67.2	1.33556	1	1	0.125	0	2	0.0078125	-2	-0.0078125
P62192	26S proteasome regulatory subunit 4 OS=Mus musculus OX=10090 GN=Psmc1 PE=1 SV=1	6.21	49.2	3.40909	1	1	0.125	0	2	0.0078125	-2	-0.0078125
P63005	Platelet-activating factor acetylhydrolase IB subunit beta OS=Mus musculus OX=10090 GN=Pafah1b1 PE=1 SV=2	7.37	46.6	2.68293	2	1	0.125	0	2	0.0078125	-2	-0.0078125
P63321	Ras-related protein Ral-A OS=Mus musculus OX=10090 GN=Rala PE=1 SV=1	7.11	23.5	3.39806	2	1	0.125	0	2	0.0078125	-2	-0.0078125
P70124	Serpin B5 OS=Mus musculus OX=10090 GN=Serpinb5 PE=1 SV=1	5.77	42.1	1.06667	1	1	0.125	0	2	0.0078125	-2	-0.0078125
P70175	Disks large homolog 3 OS=Mus musculus OX=10090 GN=Dlg3 PE=1 SV=1	6.79	93.4	3.298	1	1	0.125	0	2	0.0078125	-2	-0.0078125
P70312	Hyaluronan synthase 2 OS=Mus musculus OX=10090 GN=Has2 PE=1 SV=4	8.6	63.5	4.16667	1	1	0.125	0	2	0.0078125	-2	-0.0078125
P70318	Nucleolysin TIAR OS=Mus musculus OX=10090 GN=Tial1 PE=1 SV=1	7.99	43.4	3.31633	1	1	0.125	0	2	0.0078125	-2	-0.0078125
P70372	ELAV-like protein 1 OS=Mus musculus OX=10090 GN=Elavl1 PE=1 SV=2	9.04	36.1	7.36196	7	2	0.125	0	2	0.0078125	-2	-0.0078125
P70404	Isocitrate dehydrogenase [NAD] subunit gamma 1, mitochondrial OS=Mus musculus OX=10090 GN=Idh3g PE=1 SV=1	9.01	42.8	3.56234	1	1	0.125	0	2	0.0078125	-2	-0.0078125
P97350	Plakophilin-1 OS=Mus musculus OX=10090 GN=Pkp1 PE=1 SV=1	8.91	80.8	2.88462	1	1	0.125	0	2	0.0078125	-2	-0.0078125
P97463	Neurturin OS=Mus musculus OX=10090 GN=Nrtn PE=1 SV=1	10.92	22.2	13.8462	1	1	0.125	0	2	0.0078125	-2	-0.0078125
Q02248	Catenin beta-1 OS=Mus musculus OX=10090 GN=Ctnnb1 PE=1 SV=1	5.86	85.4	3.84123	3	2	0.125	0	2	0.0078125	-2	-0.0078125
Q02284	5-hydroxytryptamine receptor 1F OS=Mus musculus OX=10090 GN=Htr1f PE=2 SV=1	8.94	42	10.1093	1	1	0.125	0	2	0.0078125	-2	-0.0078125
Q02789	Voltage-dependent L-type calcium channel subunit alpha-1S OS=Mus musculus OX=10090 GN=Cacna1s PE=1 SV=3	6.39	210.2	0.647948	2	1	0.125	0	2	0.0078125	-2	-0.0078125
Q059P4	Filamin-A-interacting protein 1 OS=Mus musculus OX=10090 GN=Filip1 PE=1 SV=1	8.19	137.8	0.823723	2	1	0.125	0	2	0.0078125	-2	-0.0078125
Q059Y8	E3 ubiquitin-protein ligase DCST1 OS=Mus musculus OX=10090 GN=Dcst1 PE=2 SV=1	9.29	84.3	1.0929	1	1	0.125	0	2	0.0078125	-2	-0.0078125
Q08EN7	Zinc finger CW-type PWWP domain protein 2 homolog OS=Mus musculus OX=10090 GN=Zcwpw2 PE=2 SV=2	5.33	37.5	5.13595	2	1	0.125	0	2	0.0078125	-2	-0.0078125
Q09163	Protein delta homolog 1 OS=Mus musculus OX=10090 GN=Dlk1 PE=1 SV=1	5.91	41.3	11.1688	1	1	0.125	0	2	0.0078125	-2	-0.0078125
Q0VGT4	Protein ZGRF1 OS=Mus musculus OX=10090 GN=Zgrf1 PE=1 SV=2	6.27	205.6	0.214707	3	1	0.125	0	2	0.0078125	-2	-0.0078125
Q11011	Puromycin-sensitive aminopeptidase OS=Mus musculus OX=10090 GN=Npepps PE=1 SV=2	5.9	103.3	1.08696	4	1	0.125	0	2	0.0078125	-2	-0.0078125
Q14B48	Protein ITPRID1 OS=Mus musculus OX=10090 GN=Itprid1 PE=2 SV=1	5.88	115.5	4.44874	2	2	0.125	0	2	0.0078125	-2	-0.0078125
Q14BI5	Myomesin 2 OS=Mus musculus OX=10090 GN=Myom2 PE=1 SV=1	5.77	164.6	1.162	1	1	0.125	0	2	0.0078125	-2	-0.0078125
Q14BV5	Aqp6 protein OS=Mus musculus OX=10090 GN=Aqp6 PE=2 SV=1	7.91	28.8	4.71014	1	1	0.125	0	2	0.0078125	-2	-0.0078125
Q14C51	Pentatricopeptide repeat domain-containing protein 3, mitochondrial OS=Mus musculus OX=10090 GN=Ptcd3 PE=1 SV=2	5.88	77.7	3.79562	1	1	0.125	0	2	0.0078125	-2	-0.0078125
Q31615	Histocompatibility 2, T region locus 22 OS=Mus musculus OX=10090 GN=H2-T22 PE=1 SV=1	5.8	43.2	6.59631	1	1	0.125	0	2	0.0078125	-2	-0.0078125
Q32LZ8	Patatin-like phospholipase domain-containing protein 5 OS=Mus musculus OX=10090 GN=Pnpla5 PE=2 SV=1	8.72	48.4	4.16667	1	1	0.125	0	2	0.0078125	-2	-0.0078125
Q32M07	Adenylate kinase 8 OS=Mus musculus OX=10090 GN=Ak8 PE=1 SV=1	7.08	55	1.46138	1	1	0.125	0	2	0.0078125	-2	-0.0078125
Q3T9Y0	Phosphatidylinositol-4,5-bisphosphate 3-kinase OS=Mus musculus OX=10090 GN=Pik3cd PE=1 SV=1	7.34	120.1	2.29226	1	1	0.125	0	2	0.0078125	-2	-0.0078125
Q3TA59	JmjC domain-containing protein 8 OS=Mus musculus OX=10090 GN=Jmjd8 PE=2 SV=3	6.42	30.6	6.64207	5	1	0.125	0	2	0.0078125	-2	-0.0078125
Q3TQC7	Ectonucleoside triphosphate diphosphohydrolase 5 OS=Mus musculus OX=10090 GN=Entpd5 PE=1 SV=1	5.47	49.8	8.18584	2	1	0.125	0	2	0.0078125	-2	-0.0078125
Q3TTA7	E3 ubiquitin-protein ligase CBL-B OS=Mus musculus OX=10090 GN=Cblb PE=1 SV=3	7.96	109	1.12016	1	1	0.125	0	2	0.0078125	-2	-0.0078125
Q3TV65	MPN domain-containing protein OS=Mus musculus OX=10090 GN=Mpnd PE=2 SV=2	5.19	53.3	4.92813	1	1	0.125	0	2	0.0078125	-2	-0.0078125
Q3TYE7	TLC domain-containing protein 5 OS=Mus musculus OX=10090 GN=Tlcd5 PE=2 SV=1	8.48	27.7	12.2449	1	1	0.125	0	2	0.0078125	-2	-0.0078125
Q3TYX3	Histone-lysine N-trimethyltransferase SMYD5 OS=Mus musculus OX=10090 GN=Smyd5 PE=1 SV=2	5.21	47.1	16.1058	1	1	0.125	0	2	0.0078125	-2	-0.0078125
Q3U3D7	Transmembrane protein 131-like OS=Mus musculus OX=10090 GN=Tmem131l PE=1 SV=1	6.89	175.7	0.939261	1	1	0.125	0	2	0.0078125	-2	-0.0078125
Q3U3N6	AP-4 complex accessory subunit Tepsin OS=Mus musculus OX=10090 GN=Tepsin PE=2 SV=1	5.68	60.7	4.18848	1	1	0.125	0	2	0.0078125	-2	-0.0078125
Q3U962	Collagen alpha-2(V) chain OS=Mus musculus OX=10090 GN=Col5a2 PE=1 SV=1	6.7	144.9	1.2024	1	2	0.125	0	2	0.0078125	-2	-0.0078125
Q3UEL9	Thyroxine-binding globulin OS=Mus musculus OX=10090 GN=Serpina7 PE=1 SV=1	6.76	48	3.52113	1	1	0.125	0	2	0.0078125	-2	-0.0078125
Q3UGF1	WD repeat-containing protein 19 OS=Mus musculus OX=10090 GN=Wdr19 PE=1 SV=1	6.57	151.4	2.75913	1	1	0.125	0	2	0.0078125	-2	-0.0078125
Q3UHL1	CaM kinase-like vesicle-associated protein OS=Mus musculus OX=10090 GN=Camkv PE=1 SV=2	5.54	54.8	2.53906	1	1	0.125	0	2	0.0078125	-2	-0.0078125
Q3UKW5	Predicted gene 9 OS=Mus musculus OX=10090 GN=Gm9 PE=1 SV=1	4.7	17.9	16.6667	1	1	0.125	0	2	0.0078125	-2	-0.0078125
Q3UMC0	ATPase family protein 2 homolog OS=Mus musculus OX=10090 GN=Spata5 PE=1 SV=2	8.24	97.2	5.5991	7	1	0.125	0	2	0.0078125	-2	-0.0078125
Q3UMM4	Cyclin-dependent kinase 10 OS=Mus musculus OX=10090 GN=Cdk10 PE=1 SV=1	8.91	40.9	10.8333	1	1	0.125	0	2	0.0078125	-2	-0.0078125
Q3UXZ6	Protein FAM81A OS=Mus musculus OX=10090 GN=Fam81a PE=1 SV=2	8.75	41.7	2.47253	2	1	0.125	0	2	0.0078125	-2	-0.0078125
Q3UZV7	Endosome/lysosome-associated apoptosis and autophagy regulator family member 2 OS=Mus musculus OX=10090 GN=Elapor2 PE=1 SV=1	6.14	113.6	2.91829	1	1	0.125	0	2	0.0078125	-2	-0.0078125
Q3V0Q1	Dynein axonemal heavy chain 12 OS=Mus musculus OX=10090 GN=Dnah12 PE=1 SV=2	6.06	356	0.745301	1	1	0.125	0	2	0.0078125	-2	-0.0078125
Q3V0Y1	Protein PPP4R3C OS=Mus musculus OX=10090 GN=Ppp4r3c PE=2 SV=2	5.85	95.4	4.67405	3	2	0.125	0	2	0.0078125	-2	-0.0078125
Q3V1A4	Neurotrophin-3 OS=Mus musculus OX=10090 GN=Ntf3 PE=2 SV=1	9.2	31	4.42804	1	1	0.125	0	2	0.0078125	-2	-0.0078125
Q3V1H1	Cytoskeleton-associated protein 2 OS=Mus musculus OX=10090 GN=Ckap2 PE=1 SV=1	9.23	74	1.20482	1	1	0.125	0	2	0.0078125	-2	-0.0078125
Q497K5	Arrestin domain-containing protein 5 OS=Mus musculus OX=10090 GN=Arrdc5 PE=2 SV=1	7.83	36.8	10.7692	1	1	0.125	0	2	0.0078125	-2	-0.0078125
Q497L9	Solute carrier family 22 member 14 OS=Mus musculus OX=10090 GN=Slc22a14 PE=1 SV=1	7.14	71	2.38474	1	1	0.125	0	2	0.0078125	-2	-0.0078125
Q497N6	CEP295 N-terminal-like protein OS=Mus musculus OX=10090 GN=Cep295nl PE=1 SV=1	8.75	61.9	7.31707	1	1	0.125	0	2	0.0078125	-2	-0.0078125
Q4KL80	Fibronectin OS=Mus musculus OX=10090 GN=Fn1 PE=1 SV=1	8.4	42.3	1.04439	1	1	0.125	0	2	0.0078125	-2	-0.0078125
Q4KWH5	1-phosphatidylinositol 4,5-bisphosphate phosphodiesterase eta-1 OS=Mus musculus OX=10090 GN=Plch1 PE=2 SV=1	7.33	187.6	2.37812	1	1	0.125	0	2	0.0078125	-2	-0.0078125
Q56A07	Sodium channel subunit beta-2 OS=Mus musculus OX=10090 GN=Scn2b PE=1 SV=1	6.54	24.2	5.5814	1	1	0.125	0	2	0.0078125	-2	-0.0078125
Q5CZX8	RNA-binding protein 4 OS=Mus musculus OX=10090 GN=Rbm4 PE=2 SV=1	5.77	16.1	9.79021	1	1	0.125	0	2	0.0078125	-2	-0.0078125
Q5DTW7	Retroelement silencing factor 1 OS=Mus musculus OX=10090 GN=Resf1 PE=1 SV=2	7.44	168.9	2.82709	1	1	0.125	0	2	0.0078125	-2	-0.0078125
Q5DU28	Pecanex-like protein 2 OS=Mus musculus OX=10090 GN=Pcnx2 PE=2 SV=2	6.95	234	0.801131	1	1	0.125	0	2	0.0078125	-2	-0.0078125
Q5FWC3	Membrane-spanning 4-domains subfamily A member 13 OS=Mus musculus OX=10090 GN=Ms4a13 PE=2 SV=1	8.92	22.8	19.2118	1	1	0.125	0	2	0.0078125	-2	-0.0078125
Q5MJS3	Extracellular serine/threonine protein kinase FAM20C OS=Mus musculus OX=10090 GN=Fam20c PE=1 SV=1	7.47	65.7	3.28152	1	1	0.125	0	2	0.0078125	-2	-0.0078125
Q5NC05	Transcription termination factor 2 OS=Mus musculus OX=10090 GN=Ttf2 PE=1 SV=2	8.9	125.5	2.9877	1	1	0.125	0	2	0.0078125	-2	-0.0078125
Q5NCI3	DNA-directed DNA/RNA polymerase mu OS=Mus musculus OX=10090 GN=Polm PE=1 SV=1	9.04	56.5	2.73973	1	1	0.125	0	2	0.0078125	-2	-0.0078125
Q5PRF0	HEAT repeat-containing protein 5A OS=Mus musculus OX=10090 GN=Heatr5a PE=1 SV=2	6.76	219.8	0.63788	1	1	0.125	0	2	0.0078125	-2	-0.0078125
Q5RJ54	Zinc finger and SCAN domain-containing protein 26 OS=Mus musculus OX=10090 GN=Zscan26 PE=2 SV=1	8.6	53.5	3.64807	2	2	0.125	0	2	0.0078125	-2	-0.0078125
Q5SPW0	Vacuolar protein sorting-associated protein 54 OS=Mus musculus OX=10090 GN=Vps54 PE=1 SV=1	6.49	110.3	0.409417	1	1	0.125	0	2	0.0078125	-2	-0.0078125
Q5SPX8	TBC1 domain family member 10A OS=Mus musculus OX=10090 GN=Tbc1d10a PE=1 SV=1	8.02	59.2	1.49813	1	1	0.125	0	2	0.0078125	-2	-0.0078125
Q5SV77	Gametogenetin-binding protein 2 OS=Mus musculus OX=10090 GN=Ggnbp2 PE=1 SV=1	6.47	78.9	3.3046	1	1	0.125	0	2	0.0078125	-2	-0.0078125
Q5SWU9	Acetyl-CoA carboxylase 1 OS=Mus musculus OX=10090 GN=Acaca PE=1 SV=1	6.39	265.1	1.91898	1	1	0.125	0	2	0.0078125	-2	-0.0078125
Q60692	Proteasome subunit beta type-6 OS=Mus musculus OX=10090 GN=Psmb6 PE=1 SV=3	5.11	25.4	4.62185	2	1	0.125	0	2	0.0078125	-2	-0.0078125
Q60803	TNF receptor-associated factor 3 OS=Mus musculus OX=10090 GN=Traf3 PE=1 SV=2	8.05	64.3	3.88007	1	1	0.125	0	2	0.0078125	-2	-0.0078125
Q60821	Zinc finger and BTB domain-containing protein 17 OS=Mus musculus OX=10090 GN=Zbtb17 PE=1 SV=2	6.54	86.7	1.00756	1	1	0.125	0	2	0.0078125	-2	-0.0078125
Q60953	Protein PML OS=Mus musculus OX=10090 GN=Pml PE=1 SV=3	5.63	98.2	3.61582	2	2	0.125	0	2	0.0078125	-2	-0.0078125
Q61137	Astrotactin-1 OS=Mus musculus OX=10090 GN=Astn1 PE=1 SV=4	5.21	144.8	2.07373	1	1	0.125	0	2	0.0078125	-2	-0.0078125
Q61161	Mitogen-activated protein kinase kinase kinase kinase 2 OS=Mus musculus OX=10090 GN=Map4k2 PE=1 SV=1	6.46	91.2	1.21803	1	1	0.125	0	2	0.0078125	-2	-0.0078125
Q61187	Tumor susceptibility gene 101 protein OS=Mus musculus OX=10090 GN=Tsg101 PE=1 SV=2	6.71	44.1	2.04604	1	1	0.125	0	2	0.0078125	-2	-0.0078125
Q61235	Beta-2-syntrophin OS=Mus musculus OX=10090 GN=Sntb2 PE=1 SV=2	8.69	56.3	7.30769	1	1	0.125	0	2	0.0078125	-2	-0.0078125
Q61282	Aggrecan core protein OS=Mus musculus OX=10090 GN=Acan PE=1 SV=2	4.3	221.8	1.87617	1	1	0.125	0	2	0.0078125	-2	-0.0078125
Q61288	Serine/threonine-protein kinase receptor R3 OS=Mus musculus OX=10090 GN=Acvrl1 PE=1 SV=2	7.72	56.5	4.78088	1	1	0.125	0	2	0.0078125	-2	-0.0078125
Q61627	Glutamate receptor ionotropic, delta-1 OS=Mus musculus OX=10090 GN=Grid1 PE=1 SV=2	6.7	112.1	3.667	1	1	0.125	0	2	0.0078125	-2	-0.0078125
Q62005	Zona pellucida sperm-binding protein 1 OS=Mus musculus OX=10090 GN=Zp1 PE=1 SV=1	6.55	68.7	1.76565	1	1	0.125	0	2	0.0078125	-2	-0.0078125
Q62158	Zinc finger protein RFP OS=Mus musculus OX=10090 GN=Trim27 PE=1 SV=2	6.39	58.5	7.21248	2	2	0.125	0	2	0.0078125	-2	-0.0078125
Q62192	CD180 antigen OS=Mus musculus OX=10090 GN=Cd180 PE=1 SV=2	5.88	74.3	5.59758	1	1	0.125	0	2	0.0078125	-2	-0.0078125
Q62446	Peptidyl-prolyl cis-trans isomerase FKBP3 OS=Mus musculus OX=10090 GN=Fkbp3 PE=1 SV=2	9.28	25.1	12.9464	2	2	0.125	0	2	0.0078125	-2	-0.0078125
Q64299	CCN family member 3 OS=Mus musculus OX=10090 GN=Ccn3 PE=1 SV=1	7.64	38.9	21.1864	3	3	0.125	0	2	0.0078125	-2	-0.0078125
Q64487	Receptor-type tyrosine-protein phosphatase delta OS=Mus musculus OX=10090 GN=Ptprd PE=1 SV=3	6.55	214.3	1.72594	1	1	0.125	0	2	0.0078125	-2	-0.0078125
Q64727	Vinculin OS=Mus musculus OX=10090 GN=Vcl PE=1 SV=4	6	116.6	0.750469	1	1	0.125	0	2	0.0078125	-2	-0.0078125
Q66JV7	Uncharacterized protein C8orf58 homolog OS=Mus musculus OX=10090 PE=2 SV=2	5.36	40.6	12.3288	1	1	0.125	0	2	0.0078125	-2	-0.0078125
Q66X05	NACHT, LRR and PYD domains-containing protein 4F OS=Mus musculus OX=10090 GN=Nlrp4f PE=1 SV=1	7.11	110.3	3.02398	1	1	0.125	0	2	0.0078125	-2	-0.0078125
Q68FE8	Zinc finger protein 280D OS=Mus musculus OX=10090 GN=Znf280d PE=1 SV=1	6.84	107.8	5.33881	1	1	0.125	0	2	0.0078125	-2	-0.0078125
Q6EBV9	Autophagy-related protein 9B OS=Mus musculus OX=10090 GN=Atg9b PE=2 SV=2	8.22	101.8	0.542299	1	1	0.125	0	2	0.0078125	-2	-0.0078125
Q6GQT6	Sterol regulatory element-binding protein cleavage-activating protein OS=Mus musculus OX=10090 GN=Scap PE=1 SV=1	7.08	139.5	3.36991	2	2	0.125	0	2	0.0078125	-2	-0.0078125
Q6IMB2	ADP-ribosylation factor-like 9 OS=Mus musculus OX=10090 GN=Arl9 PE=2 SV=1	8.19	15.1	5.26316	2	1	0.125	0	2	0.0078125	-2	-0.0078125
Q6IMH7	A disintegrin and metallopeptidase domain 6B OS=Mus musculus OX=10090 GN=Adam6b PE=4 SV=1	7.68	85.3	2.91005	1	1	0.125	0	2	0.0078125	-2	-0.0078125
Q6NZH9	RAS, guanyl-releasing protein 3 OS=Mus musculus OX=10090 GN=Rasgrp3 PE=1 SV=1	6.71	78.1	2.74964	1	1	0.125	0	2	0.0078125	-2	-0.0078125
Q6NZL8	Signal peptide, CUB and EGF-like domain-containing protein 1 OS=Mus musculus OX=10090 GN=Scube1 PE=2 SV=2	6.8	111.5	3.04519	1	1	0.125	0	2	0.0078125	-2	-0.0078125
Q6NZR5	Superkiller viralicidic activity 2-like (S. cerevisiae) OS=Mus musculus OX=10090 GN=Skiv2l PE=1 SV=1	6.28	137.4	0.321543	3	1	0.125	0	2	0.0078125	-2	-0.0078125
Q6P1J0	Glycoprotein endo-alpha-1,2-mannosidase-like protein OS=Mus musculus OX=10090 GN=Maneal PE=2 SV=1	7.21	51.1	1.99115	1	1	0.125	0	2	0.0078125	-2	-0.0078125
Q6P3A2	Expressed sequence AA415398 OS=Mus musculus OX=10090 GN=Frg2f1 PE=2 SV=1	8.03	24.8	11.8943	1	1	0.125	0	2	0.0078125	-2	-0.0078125
Q6P5B0	RRP12-like protein OS=Mus musculus OX=10090 GN=Rrp12 PE=1 SV=1	8.91	143	0.540541	1	1	0.125	0	2	0.0078125	-2	-0.0078125
Q6P8H8	Probable dolichyl pyrophosphate Glc1Man9GlcNAc2 alpha-1,3-glucosyltransferase OS=Mus musculus OX=10090 GN=Alg8 PE=2 SV=2	9.04	59.5	3.9924	1	1	0.125	0	2	0.0078125	-2	-0.0078125
Q6P9Y7	Zinc finger protein 82 OS=Mus musculus OX=10090 GN=Zfp82 PE=2 SV=1	9	62.1	6.22642	1	1	0.125	0	2	0.0078125	-2	-0.0078125
Q6PAL1	Draxin OS=Mus musculus OX=10090 GN=Draxin PE=1 SV=2	8.65	38.3	19.8251	1	1	0.125	0	2	0.0078125	-2	-0.0078125
Q6PCM2	Integrator complex subunit 6 OS=Mus musculus OX=10090 GN=Ints6 PE=1 SV=1	8.78	99.6	0.792752	1	1	0.125	0	2	0.0078125	-2	-0.0078125
Q6PDK0	Zinc finger and BTB domain-containing 39 OS=Mus musculus OX=10090 GN=Zbtb39 PE=1 SV=1	6.51	79	1.96629	1	1	0.125	0	2	0.0078125	-2	-0.0078125
Q6PE65	G patch domain-containing protein 2-like OS=Mus musculus OX=10090 GN=Gpatch2l PE=1 SV=1	8.25	54	8.09129	1	1	0.125	0	2	0.0078125	-2	-0.0078125
Q6PFE3	DNA repair and recombination protein RAD54B OS=Mus musculus OX=10090 GN=Rad54b PE=2 SV=1	8.22	99.3	5.64334	1	1	0.125	0	2	0.0078125	-2	-0.0078125
Q6PGD2	Zinc finger protein 866 OS=Mus musculus OX=10090 GN=Zfp866 PE=1 SV=1	8.21	60.3	1.92308	1	1	0.125	0	2	0.0078125	-2	-0.0078125
Q6PIJ4	Nuclear factor related to kappa-B-binding protein OS=Mus musculus OX=10090 GN=Nfrkb PE=1 SV=1	9.22	138.7	3.47222	1	1	0.125	0	2	0.0078125	-2	-0.0078125
Q6R6I7	Relaxin receptor 1 OS=Mus musculus OX=10090 GN=Rxfp1 PE=2 SV=1	8.27	86.9	3.29815	1	1	0.125	0	2	0.0078125	-2	-0.0078125
Q6TCG8	Progestin and adipoQ receptor family member 3 OS=Mus musculus OX=10090 GN=Paqr3 PE=2 SV=1	8.53	36.2	3.85852	1	1	0.125	0	2	0.0078125	-2	-0.0078125
Q6V3W6	Dynein regulatory complex subunit 7 OS=Mus musculus OX=10090 GN=Drc7 PE=1 SV=4	5.38	103.2	4.45205	1	1	0.125	0	2	0.0078125	-2	-0.0078125
Q6ZPZ3	Zinc finger CCCH domain-containing protein 4 OS=Mus musculus OX=10090 GN=Zc3h4 PE=1 SV=2	6.27	140.9	2.14724	2	1	0.125	0	2	0.0078125	-2	-0.0078125
Q6ZQ93	Ubiquitin carboxyl-terminal hydrolase 34 OS=Mus musculus OX=10090 GN=Usp34 PE=1 SV=3	5.68	408	1.84255	2	2	0.125	0	2	0.0078125	-2	-0.0078125
Q6ZQF7	E3 ubiquitin-protein ligase Jade-2 OS=Mus musculus OX=10090 GN=Jade2 PE=1 SV=2	5.77	92.1	1.44753	1	1	0.125	0	2	0.0078125	-2	-0.0078125
Q6ZWX6	Eukaryotic translation initiation factor 2 subunit 1 OS=Mus musculus OX=10090 GN=Eif2s1 PE=1 SV=3	5.08	36.1	4.12698	1	1	0.125	0	2	0.0078125	-2	-0.0078125
Q70FJ1	A-kinase anchor protein 9 OS=Mus musculus OX=10090 GN=Akap9 PE=1 SV=2	5.03	435.9	0.447722	2	2	0.125	0	2	0.0078125	-2	-0.0078125
Q78PG9	Coiled-coil domain-containing protein 25 OS=Mus musculus OX=10090 GN=Ccdc25 PE=1 SV=1	6.95	24.5	4.32692	2	1	0.125	0	2	0.0078125	-2	-0.0078125
Q7M757	Lys-63-specific deubiquitinase BRCC36-like OS=Mus musculus OX=10090 GN=C6.1al PE=2 SV=1	6.23	33.1	10.6529	1	1	0.125	0	2	0.0078125	-2	-0.0078125
Q7TNM2	Tripartite motif-containing protein 46 OS=Mus musculus OX=10090 GN=Trim46 PE=1 SV=1	7.65	83.4	3.0303	1	1	0.125	0	2	0.0078125	-2	-0.0078125
Q7TPD0	Integrator complex subunit 3 OS=Mus musculus OX=10090 GN=Ints3 PE=1 SV=2	5.8	117.9	1.44092	1	1	0.125	0	2	0.0078125	-2	-0.0078125
Q7TPN9	Proline-rich protein 14 OS=Mus musculus OX=10090 GN=Prr14 PE=1 SV=1	9.94	67.8	4.90196	1	1	0.125	0	2	0.0078125	-2	-0.0078125
Q7TQA6	Taste receptor type 2 member 38 OS=Mus musculus OX=10090 GN=Tas2r38 PE=2 SV=1	8.9	36.9	6.94864	1	1	0.125	0	2	0.0078125	-2	-0.0078125
Q7TRS6	Olfactory receptor 553 OS=Mus musculus OX=10090 GN=Olfr553 PE=4 SV=2	8.6	36	12.8834	2	1	0.125	0	2	0.0078125	-2	-0.0078125
Q7TRX6	Olfactory receptor OS=Mus musculus OX=10090 GN=Olfr392 PE=3 SV=1	8.65	35.3	8.65385	2	2	0.125	0	2	0.0078125	-2	-0.0078125
Q7TS04	Olfactory receptor 301 OS=Mus musculus OX=10090 GN=Olfr301 PE=4 SV=1	8.34	35	11.254	1	1	0.125	0	2	0.0078125	-2	-0.0078125
Q7TS05	Olfactory receptor 299 OS=Mus musculus OX=10090 GN=Olfr299 PE=4 SV=1	8.73	37.4	7.87879	1	1	0.125	0	2	0.0078125	-2	-0.0078125
Q7TS06	Olfactory receptor 298 OS=Mus musculus OX=10090 GN=Olfr298 PE=4 SV=1	7.96	36.5	12.3494	1	1	0.125	0	2	0.0078125	-2	-0.0078125
Q80T79	CUB and sushi domain-containing protein 3 OS=Mus musculus OX=10090 GN=Csmd3 PE=1 SV=3	5.95	405.5	1.15997	1	1	0.125	0	2	0.0078125	-2	-0.0078125
Q80TA9	Ectopic P granules protein 5 homolog OS=Mus musculus OX=10090 GN=Epg5 PE=1 SV=2	6.37	290.6	1.12753	3	3	0.125	0	2	0.0078125	-2	-0.0078125
Q80TY5	Vacuolar protein sorting-associated protein 13B OS=Mus musculus OX=10090 GN=Vps13b PE=1 SV=3	6.46	443.7	0.32557	1	1	0.125	0	2	0.0078125	-2	-0.0078125
Q80VK6	Rho guanine nucleotide exchange factor 38 OS=Mus musculus OX=10090 GN=Arhgef38 PE=1 SV=2	6.74	87.6	3.50649	1	1	0.125	0	2	0.0078125	-2	-0.0078125
Q80W31	Zinc finger protein 569 OS=Mus musculus OX=10090 GN=Znf569 PE=2 SV=2	7.99	77.2	2.20913	1	1	0.125	0	2	0.0078125	-2	-0.0078125
Q80W68	Kin of IRRE-like protein 1 OS=Mus musculus OX=10090 GN=Kirrel1 PE=1 SV=1	5.92	87.1	3.67554	1	1	0.125	0	2	0.0078125	-2	-0.0078125
Q80W93	Hydrocephalus-inducing protein OS=Mus musculus OX=10090 GN=Hydin PE=1 SV=2	6.38	581.2	0.834303	1	1	0.125	0	2	0.0078125	-2	-0.0078125
Q80XC0	Slc15a2 protein OS=Mus musculus OX=10090 GN=Slc15a2 PE=1 SV=1	6.1	28.4	10.8108	1	1	0.125	0	2	0.0078125	-2	-0.0078125
Q80XK6	Autophagy-related protein 2 homolog B OS=Mus musculus OX=10090 GN=Atg2b PE=1 SV=3	5.88	231.3	0.337349	2	1	0.125	0	2	0.0078125	-2	-0.0078125
Q80Y20	Alkylated DNA repair protein alkB homolog 8 OS=Mus musculus OX=10090 GN=Alkbh8 PE=1 SV=1	7.97	74.7	2.86145	1	1	0.125	0	2	0.0078125	-2	-0.0078125
Q80Y50	Calmodulin-binding transcription activator 2 OS=Mus musculus OX=10090 GN=Camta2 PE=2 SV=1	7.36	131.9	1.90397	1	1	0.125	0	2	0.0078125	-2	-0.0078125
Q80Y83	Dixin OS=Mus musculus OX=10090 GN=Dixdc1 PE=1 SV=1	6.18	80.2	1.40647	1	1	0.125	0	2	0.0078125	-2	-0.0078125
Q8BG18	N-terminal EF-hand calcium-binding protein 1 OS=Mus musculus OX=10090 GN=Necab1 PE=1 SV=1	4.89	40.9	7.10227	1	1	0.125	0	2	0.0078125	-2	-0.0078125
Q8BGF6	ELMO domain-containing protein 2 OS=Mus musculus OX=10090 GN=Elmod2 PE=1 SV=1	8.57	34.7	3.41297	1	1	0.125	0	2	0.0078125	-2	-0.0078125
Q8BGG0	Zinc transporter 8 OS=Mus musculus OX=10090 GN=Slc30a8 PE=2 SV=1	6.7	40.2	7.90191	1	1	0.125	0	2	0.0078125	-2	-0.0078125
Q8BGI5	Peroxisome assembly protein 26 OS=Mus musculus OX=10090 GN=Pex26 PE=1 SV=2	6.8	34	11.1475	1	1	0.125	0	2	0.0078125	-2	-0.0078125
Q8BGJ9	Splicing factor U2AF 26 kDa subunit OS=Mus musculus OX=10090 GN=U2af1l4 PE=1 SV=1	8.1	25.8	6.36364	3	1	0.125	0	2	0.0078125	-2	-0.0078125
Q8BHL3	TBC1 domain family member 10B OS=Mus musculus OX=10090 GN=Tbc1d10b PE=1 SV=2	8.9	87.2	2.13033	1	1	0.125	0	2	0.0078125	-2	-0.0078125
Q8BLB0	Zinc finger protein 3 OS=Mus musculus OX=10090 GN=Zfp3 PE=2 SV=1	7.94	56.5	3.01811	1	1	0.125	0	2	0.0078125	-2	-0.0078125
Q8BLB7	Lethal(3)malignant brain tumor-like protein 3 OS=Mus musculus OX=10090 GN=L3mbtl3 PE=1 SV=1	7.15	99.1	4.41676	1	1	0.125	0	2	0.0078125	-2	-0.0078125
Q8BMD8	Calcium-binding mitochondrial carrier protein SCaMC-1 OS=Mus musculus OX=10090 GN=Slc25a24 PE=1 SV=1	7.43	52.9	4.42105	1	1	0.125	0	2	0.0078125	-2	-0.0078125
Q8BMI3	ADP-ribosylation factor-binding protein GGA3 OS=Mus musculus OX=10090 GN=Gga3 PE=1 SV=2	5.66	77.9	3.89972	1	1	0.125	0	2	0.0078125	-2	-0.0078125
Q8BNA6	Protocadherin Fat 3 OS=Mus musculus OX=10090 GN=Fat3 PE=1 SV=2	4.87	501.7	0.373216	1	1	0.125	0	2	0.0078125	-2	-0.0078125
Q8BQR4	KAT8 regulatory NSL complex subunit 2 OS=Mus musculus OX=10090 GN=Kansl2 PE=1 SV=1	6.79	54.1	1.44033	1	1	0.125	0	2	0.0078125	-2	-0.0078125
Q8BQT2	Divergent protein kinase domain 1C OS=Mus musculus OX=10090 GN=Dipk1c PE=2 SV=2	7.74	45.9	5.12195	1	1	0.125	0	2	0.0078125	-2	-0.0078125
Q8BS30	Semenogelin 1 OS=Mus musculus OX=10090 GN=Semg1 PE=1 SV=1	9.89	40.8	3.46667	3	1	0.125	0	2	0.0078125	-2	-0.0078125
Q8BSA9	tRNA wybutosine-synthesizing protein 3 homolog OS=Mus musculus OX=10090 GN=Tyw3 PE=1 SV=1	7.78	28.6	7.00389	1	1	0.125	0	2	0.0078125	-2	-0.0078125
Q8BTY8	Sec1 family domain-containing protein 2 OS=Mus musculus OX=10090 GN=Scfd2 PE=1 SV=1	6.81	74.7	2.63158	1	1	0.125	0	2	0.0078125	-2	-0.0078125
Q8BU25	Inactive serine protease PAMR1 OS=Mus musculus OX=10090 GN=Pamr1 PE=2 SV=3	7.3	80.3	5.41667	1	1	0.125	0	2	0.0078125	-2	-0.0078125
Q8BUB6	Uronyl 2-sulfotransferase OS=Mus musculus OX=10090 GN=Ust PE=2 SV=3	8.57	47.7	7.12531	1	1	0.125	0	2	0.0078125	-2	-0.0078125
Q8BUR4	Dedicator of cytokinesis protein 1 OS=Mus musculus OX=10090 GN=Dock1 PE=1 SV=3	7.62	214.9	1.23324	1	1	0.125	0	2	0.0078125	-2	-0.0078125
Q8BVE8	Histone-lysine N-methyltransferase NSD2 OS=Mus musculus OX=10090 GN=Nsd2 PE=1 SV=2	8.51	152.2	1.8315	1	1	0.125	0	2	0.0078125	-2	-0.0078125
Q8BW94	Dynein axonemal heavy chain 3 OS=Mus musculus OX=10090 GN=Dnah3 PE=1 SV=2	5.91	467.5	0.416361	1	1	0.125	0	2	0.0078125	-2	-0.0078125
Q8BWZ3	N-alpha-acetyltransferase 25, NatB auxiliary subunit OS=Mus musculus OX=10090 GN=Naa25 PE=1 SV=1	6.52	111.6	0.823045	1	1	0.125	0	2	0.0078125	-2	-0.0078125
Q8BXQ8	Protein FAM53C OS=Mus musculus OX=10090 GN=Fam53c PE=1 SV=1	7.72	43.2	4.3257	1	1	0.125	0	2	0.0078125	-2	-0.0078125
Q8BYY4	Tetratricopeptide repeat protein 39B OS=Mus musculus OX=10090 GN=Ttc39b PE=1 SV=1	6.64	70.2	0.648298	1	1	0.125	0	2	0.0078125	-2	-0.0078125
Q8BZ34	Zinc finger protein 641 OS=Mus musculus OX=10090 GN=Znf641 PE=2 SV=1	6.86	47.4	7.109	1	1	0.125	0	2	0.0078125	-2	-0.0078125
Q8C1Z7	Bardet-Biedl syndrome 4 protein homolog OS=Mus musculus OX=10090 GN=Bbs4 PE=1 SV=1	8.1	58.2	9.42308	1	1	0.125	0	2	0.0078125	-2	-0.0078125
Q8C2B3	Histone deacetylase 7 OS=Mus musculus OX=10090 GN=Hdac7 PE=1 SV=2	7.47	101.2	1.27932	2	1	0.125	0	2	0.0078125	-2	-0.0078125
Q8C341	SUN domain-containing ossification factor OS=Mus musculus OX=10090 GN=Suco PE=1 SV=3	5.02	139.1	1.28	3	2	0.125	0	2	0.0078125	-2	-0.0078125
Q8C3P7	N6-adenosine-methyltransferase subunit METTL3 OS=Mus musculus OX=10090 GN=Mettl3 PE=1 SV=2	6.49	64.6	2.06897	1	1	0.125	0	2	0.0078125	-2	-0.0078125
Q8C3Y4	Kinetochore-associated protein 1 OS=Mus musculus OX=10090 GN=Kntc1 PE=1 SV=2	6	250.2	1.99366	1	1	0.125	0	2	0.0078125	-2	-0.0078125
Q8C5H8	NAD kinase 2, mitochondrial OS=Mus musculus OX=10090 GN=Nadk2 PE=1 SV=2	8.07	50.8	5.30973	1	1	0.125	0	2	0.0078125	-2	-0.0078125
Q8C6E1	Apolipoprotein L 7c OS=Mus musculus OX=10090 GN=Apol7c PE=2 SV=1	5.02	40.3	8.40108	1	1	0.125	0	2	0.0078125	-2	-0.0078125
Q8C708	Transmembrane protein C16orf54 homolog OS=Mus musculus OX=10090 PE=1 SV=1	5.38	24.5	6.66667	1	1	0.125	0	2	0.0078125	-2	-0.0078125
Q8C753	Katanin-interacting protein OS=Mus musculus OX=10090 GN=Katnip PE=1 SV=2	5.26	179.5	2.79503	2	2	0.125	0	2	0.0078125	-2	-0.0078125
Q8CAS9	Protein mono-ADP-ribosyltransferase PARP9 OS=Mus musculus OX=10090 GN=Parp9 PE=1 SV=2	7.09	96.6	3.23326	1	1	0.125	0	2	0.0078125	-2	-0.0078125
Q8CB96	Ras association domain-containing protein 4 OS=Mus musculus OX=10090 GN=Rassf4 PE=1 SV=1	6.7	36.9	6.52174	1	1	0.125	0	2	0.0078125	-2	-0.0078125
Q8CCS2	NALCN channel auxiliary factor 1 OS=Mus musculus OX=10090 GN=Nalf1 PE=1 SV=1	6.86	52.7	3.42612	1	1	0.125	0	2	0.0078125	-2	-0.0078125
Q8CDN1	Uncharacterized protein C3orf20 homolog OS=Mus musculus OX=10090 PE=2 SV=1	9.33	104.2	3.10825	1	1	0.125	0	2	0.0078125	-2	-0.0078125
Q8CDN8	Coiled-coil domain-containing protein 38 OS=Mus musculus OX=10090 GN=Ccdc38 PE=2 SV=1	8.91	65.8	4.4405	1	1	0.125	0	2	0.0078125	-2	-0.0078125
Q8CFT2	Histone-lysine N-methyltransferase SETD1B OS=Mus musculus OX=10090 GN=Setd1b PE=1 SV=2	4.96	215.2	1.15869	1	1	0.125	0	2	0.0078125	-2	-0.0078125
Q8CG16	Complement C1r-A subcomponent OS=Mus musculus OX=10090 GN=C1ra PE=1 SV=1	5.66	80	4.10184	1	1	0.125	0	2	0.0078125	-2	-0.0078125
Q8CH18	Cell division cycle and apoptosis regulator protein 1 OS=Mus musculus OX=10090 GN=Ccar1 PE=1 SV=1	5.76	132	0.8726	1	1	0.125	0	2	0.0078125	-2	-0.0078125
Q8CHP0	Zinc finger CCCH domain-containing protein 3 OS=Mus musculus OX=10090 GN=Zc3h3 PE=1 SV=1	10.58	103.2	2.84211	1	1	0.125	0	2	0.0078125	-2	-0.0078125
Q8CIS0	Caspase recruitment domain-containing protein 11 OS=Mus musculus OX=10090 GN=Card11 PE=1 SV=2	6.37	134	1.3805	1	1	0.125	0	2	0.0078125	-2	-0.0078125
Q8CJG0	Protein argonaute-2 OS=Mus musculus OX=10090 GN=Ago2 PE=1 SV=3	9.19	97.2	4.76744	3	2	0.125	0	2	0.0078125	-2	-0.0078125
Q8JZP2	Synapsin-3 OS=Mus musculus OX=10090 GN=Syn3 PE=1 SV=2	9.38	63.3	8.29016	1	1	0.125	0	2	0.0078125	-2	-0.0078125
Q8JZP9	GAS2-like protein 1 OS=Mus musculus OX=10090 GN=Gas2l1 PE=1 SV=1	10.01	72.4	1.03245	1	1	0.125	0	2	0.0078125	-2	-0.0078125
Q8K031	StAR-related lipid transfer protein 8 OS=Mus musculus OX=10090 GN=Stard8 PE=1 SV=2	5.68	113	1.6683	1	1	0.125	0	2	0.0078125	-2	-0.0078125
Q8K0B2	Lysosomal cobalamin transport escort protein LMBD1 OS=Mus musculus OX=10090 GN=Lmbrd1 PE=1 SV=1	7.53	61	6.89013	1	1	0.125	0	2	0.0078125	-2	-0.0078125
Q8K183	Pyridoxal kinase OS=Mus musculus OX=10090 GN=Pdxk PE=1 SV=1	6.29	35	6.73077	1	1	0.125	0	2	0.0078125	-2	-0.0078125
Q8K1J5	Replication stress response regulator SDE2 OS=Mus musculus OX=10090 GN=Sde2 PE=1 SV=1	5.66	48.6	9.375	1	1	0.125	0	2	0.0078125	-2	-0.0078125
Q8K1T1	Leucine-rich repeat-containing protein 25 OS=Mus musculus OX=10090 GN=Lrrc25 PE=1 SV=1	8.24	32.7	5.05051	1	1	0.125	0	2	0.0078125	-2	-0.0078125
Q8K205	Processing of 1, ribonuclease P/MRP family, (S. cerevisiae) OS=Mus musculus OX=10090 GN=Pop1 PE=1 SV=1	9.11	117.3	1.81818	1	1	0.125	0	2	0.0078125	-2	-0.0078125
Q8K268	ATP-binding cassette sub-family F member 3 OS=Mus musculus OX=10090 GN=Abcf3 PE=1 SV=1	6.16	79.8	2.39774	1	1	0.125	0	2	0.0078125	-2	-0.0078125
Q8K274	Ketosamine-3-kinase OS=Mus musculus OX=10090 GN=Fn3krp PE=1 SV=2	7.87	34.4	2.26537	1	1	0.125	0	2	0.0078125	-2	-0.0078125
Q8K2H4	Arf-GAP with coiled-coil, ANK repeat and PH domain-containing protein 1 OS=Mus musculus OX=10090 GN=Acap1 PE=1 SV=1	7.52	81.7	3.24324	1	1	0.125	0	2	0.0078125	-2	-0.0078125
Q8K2Z4	Condensin complex subunit 1 OS=Mus musculus OX=10090 GN=Ncapd2 PE=1 SV=2	6.38	155.6	2.87356	1	1	0.125	0	2	0.0078125	-2	-0.0078125
Q8K342	Ras association domain-containing protein 9 OS=Mus musculus OX=10090 GN=Rassf9 PE=2 SV=1	5.34	49.6	6.2069	1	1	0.125	0	2	0.0078125	-2	-0.0078125
Q8K3V7	Major intrinsically disordered Notch2-binding receptor 1 OS=Mus musculus OX=10090 GN=Minar1 PE=1 SV=1	7.24	102.7	2.07197	1	1	0.125	0	2	0.0078125	-2	-0.0078125
Q8K410	Disintegrin and metalloproteinase domain-containing protein 32 OS=Mus musculus OX=10090 GN=Adam32 PE=1 SV=3	7.08	83.9	1.85676	2	1	0.125	0	2	0.0078125	-2	-0.0078125
Q8K4L0	ATP-dependent RNA helicase DDX54 OS=Mus musculus OX=10090 GN=Ddx54 PE=1 SV=1	10.01	97.7	2.86041	1	1	0.125	0	2	0.0078125	-2	-0.0078125
Q8R0S9	Solute carrier family 22 member 22 OS=Mus musculus OX=10090 GN=Slc22a22 PE=1 SV=1	7.18	62.4	2.88809	3	1	0.125	0	2	0.0078125	-2	-0.0078125
Q8R151	NFX1-type zinc finger-containing protein 1 OS=Mus musculus OX=10090 GN=Znfx1 PE=1 SV=3	7.47	218.7	1.20482	2	1	0.125	0	2	0.0078125	-2	-0.0078125
Q8R1X1	Arachidonate--CoA ligase OS=Mus musculus OX=10090 GN=Acsl6 PE=1 SV=2	7.12	80.7	3.60111	3	2	0.125	0	2	0.0078125	-2	-0.0078125
Q8R2D3	Vomeronasal type-1 receptor OS=Mus musculus OX=10090 GN=Vmn1r4 PE=2 SV=1	9.47	33.9	13.468	1	1	0.125	0	2	0.0078125	-2	-0.0078125
Q8R2Q3	Zinc finger protein 940 OS=Mus musculus OX=10090 GN=Zfp940 PE=2 SV=1	8.68	64.5	4.947	1	1	0.125	0	2	0.0078125	-2	-0.0078125
Q8R3P9	SMC5-SMC6 complex localization factor protein 1 OS=Mus musculus OX=10090 GN=Slf1 PE=1 SV=3	8.59	120.9	3.13093	3	2	0.125	0	2	0.0078125	-2	-0.0078125
Q8R4I7	Neuropilin and tolloid-like protein 1 OS=Mus musculus OX=10090 GN=Neto1 PE=1 SV=2	6.99	60.2	3.37711	1	1	0.125	0	2	0.0078125	-2	-0.0078125
Q8R4P5	Transmembrane channel-like protein 1 OS=Mus musculus OX=10090 GN=Tmc1 PE=1 SV=1	6.01	87.2	4.49141	1	1	0.125	0	2	0.0078125	-2	-0.0078125
Q8R574	Phosphoribosyl pyrophosphate synthase-associated protein 2 OS=Mus musculus OX=10090 GN=Prpsap2 PE=1 SV=1	7.17	40.9	10.2981	1	1	0.125	0	2	0.0078125	-2	-0.0078125
Q8VCU0	Protein angel homolog 1 OS=Mus musculus OX=10090 GN=Angel1 PE=1 SV=2	4.73	75.2	5.24738	2	2	0.125	0	2	0.0078125	-2	-0.0078125
Q8VDB2	Dol-P-Man:Man(7)GlcNAc(2)-PP-Dol alpha-1,6-mannosyltransferase OS=Mus musculus OX=10090 GN=Alg12 PE=2 SV=2	9.33	54.5	9.87654	1	1	0.125	0	2	0.0078125	-2	-0.0078125
Q8VDD5	Myosin-9 OS=Mus musculus OX=10090 GN=Myh9 PE=1 SV=4	5.66	226.2	0.459184	1	1	0.125	0	2	0.0078125	-2	-0.0078125
Q8VEA4	Mitochondrial intermembrane space import and assembly protein 40 OS=Mus musculus OX=10090 GN=Chchd4 PE=1 SV=1	4.32	15.5	25.8993	1	1	0.125	0	2	0.0078125	-2	-0.0078125
Q8VEA8	Ras-related protein Rab-7b OS=Mus musculus OX=10090 GN=Rab7b PE=1 SV=1	6.21	22.5	3.51759	5	1	0.125	0	2	0.0078125	-2	-0.0078125
Q8VEK6	Inhibitor of growth protein 3 OS=Mus musculus OX=10090 GN=Ing3 PE=1 SV=2	6.27	46.8	8.7886	2	1	0.125	0	2	0.0078125	-2	-0.0078125
Q8VF20	Olfactory receptor 509 OS=Mus musculus OX=10090 GN=Olfr509 PE=2 SV=1	9.35	36.3	9.96885	1	1	0.125	0	2	0.0078125	-2	-0.0078125
Q8VFI1	Olfactory receptor OS=Mus musculus OX=10090 GN=Olfr811 PE=3 SV=1	8.9	36.6	10.6583	1	1	0.125	0	2	0.0078125	-2	-0.0078125
Q8VG26	Olfactory receptor OS=Mus musculus OX=10090 GN=Olfr678 PE=3 SV=1	9.35	35.5	11.1821	1	1	0.125	0	2	0.0078125	-2	-0.0078125
Q8VHS2	Protein crumbs homolog 1 OS=Mus musculus OX=10090 GN=Crb1 PE=1 SV=3	5.1	153.2	3.13167	2	2	0.125	0	2	0.0078125	-2	-0.0078125
Q8VIK5	Platelet endothelial aggregation receptor 1 OS=Mus musculus OX=10090 GN=Pear1 PE=1 SV=1	6.76	110.5	3.2882	1	1	0.125	0	2	0.0078125	-2	-0.0078125
Q91V51	Polyglutamylase complex subunit TTLL1 OS=Mus musculus OX=10090 GN=Ttll1 PE=1 SV=1	8.72	49.1	5.91017	1	1	0.125	0	2	0.0078125	-2	-0.0078125
Q91VU7	Pseudouridylate synthase 7 homolog OS=Mus musculus OX=10090 GN=Pus7 PE=2 SV=2	5.87	74.7	3.33333	1	1	0.125	0	2	0.0078125	-2	-0.0078125
Q91XW8	Inactive peptidyl-prolyl cis-trans isomerase FKBP6 OS=Mus musculus OX=10090 GN=Fkbp6 PE=1 SV=1	8	37.1	4.89297	1	1	0.125	0	2	0.0078125	-2	-0.0078125
Q91Y44	Bromodomain testis-specific protein OS=Mus musculus OX=10090 GN=Brdt PE=1 SV=3	8.97	107.2	2.61506	1	1	0.125	0	2	0.0078125	-2	-0.0078125
Q91Z40	Guanylate-binding protein 7 OS=Mus musculus OX=10090 GN=Gbp7 PE=1 SV=2	6.33	72.7	2.50784	1	1	0.125	0	2	0.0078125	-2	-0.0078125
Q920C1	Chordin-like protein 1 OS=Mus musculus OX=10090 GN=Chrdl1 PE=1 SV=1	7.69	50.7	5.81655	2	1	0.125	0	2	0.0078125	-2	-0.0078125
Q920Q6	RNA-binding protein Musashi homolog 2 OS=Mus musculus OX=10090 GN=Msi2 PE=1 SV=1	8.47	36.9	4.33526	4	1	0.125	0	2	0.0078125	-2	-0.0078125
Q921G7	Electron transfer flavoprotein-ubiquinone oxidoreductase, mitochondrial OS=Mus musculus OX=10090 GN=Etfdh PE=1 SV=1	7.58	68	1.94805	1	1	0.125	0	2	0.0078125	-2	-0.0078125
Q922D8	C-1-tetrahydrofolate synthase, cytoplasmic OS=Mus musculus OX=10090 GN=Mthfd1 PE=1 SV=4	7.14	101.1	3.74332	2	2	0.125	0	2	0.0078125	-2	-0.0078125
Q922H7	Ras-like protein family member 11B OS=Mus musculus OX=10090 GN=Rasl11b PE=2 SV=1	9.13	27.3	12.9555	1	1	0.125	0	2	0.0078125	-2	-0.0078125
Q922H9	Zinc finger protein 330 OS=Mus musculus OX=10090 GN=Znf330 PE=1 SV=1	6.16	35.6	8.5443	1	1	0.125	0	2	0.0078125	-2	-0.0078125
Q922S8	Kinesin-like protein KIF2C OS=Mus musculus OX=10090 GN=Kif2c PE=1 SV=1	7.97	81	1.52566	1	1	0.125	0	2	0.0078125	-2	-0.0078125
Q923B6	Metalloreductase STEAP4 OS=Mus musculus OX=10090 GN=Steap4 PE=1 SV=1	9.17	53	5.74468	1	1	0.125	0	2	0.0078125	-2	-0.0078125
Q924Z5	Translocating chain-associated membrane protein 2 OS=Mus musculus OX=10090 GN=Tram2 PE=1 SV=1	9.39	43.2	4.59459	1	1	0.125	0	2	0.0078125	-2	-0.0078125
Q925I1	ATPase family AAA domain-containing protein 3 OS=Mus musculus OX=10090 GN=Atad3 PE=1 SV=1	9.29	66.7	2.53807	1	1	0.125	0	2	0.0078125	-2	-0.0078125
Q99J27	Acetyl-coenzyme A transporter 1 OS=Mus musculus OX=10090 GN=Slc33a1 PE=1 SV=1	8.16	61	1.45455	3	1	0.125	0	2	0.0078125	-2	-0.0078125
Q99LS0	Augurin OS=Mus musculus OX=10090 GN=Ecrg4 PE=1 SV=2	8.57	17	23.6486	1	1	0.125	0	2	0.0078125	-2	-0.0078125
Q99MR8	Methylcrotonoyl-CoA carboxylase subunit alpha, mitochondrial OS=Mus musculus OX=10090 GN=Mccc1 PE=1 SV=2	7.83	79.3	3.76569	1	1	0.125	0	2	0.0078125	-2	-0.0078125
Q99N92	39S ribosomal protein L27, mitochondrial OS=Mus musculus OX=10090 GN=Mrpl27 PE=1 SV=1	10.17	15.9	30.4054	1	1	0.125	0	2	0.0078125	-2	-0.0078125
Q99NH4	Olfactory receptor 661 OS=Mus musculus OX=10090 GN=Olfr661 PE=4 SV=1	8.38	35.7	6.26959	1	1	0.125	0	2	0.0078125	-2	-0.0078125
Q99P25	Translin-associated factor X-interacting protein 1 OS=Mus musculus OX=10090 GN=Tsnaxip1 PE=1 SV=2	5.34	81.7	4.26136	1	1	0.125	0	2	0.0078125	-2	-0.0078125
Q99P58	Ras-related protein Rab-27B OS=Mus musculus OX=10090 GN=Rab27b PE=1 SV=3	5.54	24.5	20.1835	1	1	0.125	0	2	0.0078125	-2	-0.0078125
Q99PE2	Ankyrin repeat family A protein 2 OS=Mus musculus OX=10090 GN=Ankra2 PE=1 SV=1	5.17	34	8.01282	1	1	0.125	0	2	0.0078125	-2	-0.0078125
Q9CQJ8	NADH dehydrogenase [ubiquinone] 1 beta subcomplex subunit 9 OS=Mus musculus OX=10090 GN=Ndufb9 PE=1 SV=3	7.8	22	15.6425	1	1	0.125	0	2	0.0078125	-2	-0.0078125
Q9CR14	E3 ubiquitin-protein ligase FANCL OS=Mus musculus OX=10090 GN=Fancl PE=1 SV=1	6.52	42.5	4.8	1	1	0.125	0	2	0.0078125	-2	-0.0078125
Q9CXH7	Shugoshin 1 OS=Mus musculus OX=10090 GN=Sgo1 PE=2 SV=1	9.58	58.9	3.67505	1	1	0.125	0	2	0.0078125	-2	-0.0078125
Q9CYG7	Mitochondrial import receptor subunit TOM34 OS=Mus musculus OX=10090 GN=Tomm34 PE=1 SV=1	9.14	34.3	2.91262	1	1	0.125	0	2	0.0078125	-2	-0.0078125
Q9D0R9	WD repeat-containing protein 89 OS=Mus musculus OX=10090 GN=Wdr89 PE=2 SV=1	5.66	42.4	3.10881	2	1	0.125	0	2	0.0078125	-2	-0.0078125
Q9D0U1	tRNA-uridine aminocarboxypropyltransferase 2 OS=Mus musculus OX=10090 GN=Dtwd2 PE=2 SV=1	7.93	33.1	3.02013	1	1	0.125	0	2	0.0078125	-2	-0.0078125
Q9D0U9	Protein ARV1 OS=Mus musculus OX=10090 GN=Arv1 PE=2 SV=1	8.5	30.5	4.88722	1	1	0.125	0	2	0.0078125	-2	-0.0078125
Q9D232	Protein spinster homolog 3 OS=Mus musculus OX=10090 GN=Spns3 PE=2 SV=1	8.1	55.4	6.42023	1	1	0.125	0	2	0.0078125	-2	-0.0078125
Q9D281	Protein Noxp20 OS=Mus musculus OX=10090 GN=Fam114a1 PE=1 SV=1	4.56	61	3.16344	1	1	0.125	0	2	0.0078125	-2	-0.0078125
Q9D2V8	Major facilitator superfamily domain-containing protein 10 OS=Mus musculus OX=10090 GN=Mfsd10 PE=1 SV=1	9.95	49.3	7.01754	1	1	0.125	0	2	0.0078125	-2	-0.0078125
Q9D2X0	Ankyrin repeat domain-containing protein 39 OS=Mus musculus OX=10090 GN=Ankrd39 PE=1 SV=1	6.73	19.6	18.0328	1	1	0.125	0	2	0.0078125	-2	-0.0078125
Q9D6G9	CKLF-like MARVEL transmembrane domain-containing protein 5 OS=Mus musculus OX=10090 GN=Cmtm5 PE=1 SV=1	4.84	17.4	15.3846	1	1	0.125	0	2	0.0078125	-2	-0.0078125
Q9D7B6	Isobutyryl-CoA dehydrogenase, mitochondrial OS=Mus musculus OX=10090 GN=Acad8 PE=1 SV=2	8.13	45	5.81114	1	1	0.125	0	2	0.0078125	-2	-0.0078125
Q9D7J6	Deoxyribonuclease-1-like 1 OS=Mus musculus OX=10090 GN=Dnase1l1 PE=2 SV=3	7.2	35.6	8.9172	1	1	0.125	0	2	0.0078125	-2	-0.0078125
Q9D842	Aprataxin and PNK-like factor OS=Mus musculus OX=10090 GN=Aplf PE=1 SV=2	5.21	54.9	1.80361	1	1	0.125	0	2	0.0078125	-2	-0.0078125
Q9D966	Secreted and transmembrane protein 1b OS=Mus musculus OX=10090 GN=Sectm1b PE=1 SV=1	8.69	23.5	22.6415	1	1	0.125	0	2	0.0078125	-2	-0.0078125
Q9DAU7	WAP four-disulfide core domain protein 2 OS=Mus musculus OX=10090 GN=Wfdc2 PE=1 SV=1	5.34	18	15.5172	1	1	0.125	0	2	0.0078125	-2	-0.0078125
Q9DBL0	Alpha-1B adrenergic receptor OS=Mus musculus OX=10090 GN=Adra1b PE=1 SV=1	9.17	56.5	2.13592	1	1	0.125	0	2	0.0078125	-2	-0.0078125
Q9DCS9	NADH dehydrogenase [ubiquinone] 1 beta subcomplex subunit 10 OS=Mus musculus OX=10090 GN=Ndufb10 PE=1 SV=3	8.03	21	10.7955	1	1	0.125	0	2	0.0078125	-2	-0.0078125
Q9EP53	Hamartin OS=Mus musculus OX=10090 GN=Tsc1 PE=1 SV=1	6.37	128.7	3.87597	1	1	0.125	0	2	0.0078125	-2	-0.0078125
Q9EPK6	Nucleotide exchange factor SIL1 OS=Mus musculus OX=10090 GN=Sil1 PE=1 SV=2	5.27	52.4	7.31183	4	2	0.125	0	2	0.0078125	-2	-0.0078125
Q9EQQ7	Olfactory receptor OS=Mus musculus OX=10090 GN=Olfr630 PE=2 SV=1	8.84	36	1.88088	1	1	0.125	0	2	0.0078125	-2	-0.0078125
Q9ERU9	E3 SUMO-protein ligase RanBP2 OS=Mus musculus OX=10090 GN=Ranbp2 PE=1 SV=2	6.18	340.9	0.786112	3	2	0.125	0	2	0.0078125	-2	-0.0078125
Q9ES34	Ubiquitin-protein ligase E3B OS=Mus musculus OX=10090 GN=Ube3b PE=1 SV=3	8.32	122.7	2.24299	1	1	0.125	0	2	0.0078125	-2	-0.0078125
Q9ES63	Ubiquitin carboxyl-terminal hydrolase 29 OS=Mus musculus OX=10090 GN=Usp29 PE=1 SV=2	5.6	97.8	1.15075	1	1	0.125	0	2	0.0078125	-2	-0.0078125
Q9ES90	G-protein coupled receptor 35 OS=Mus musculus OX=10090 GN=Gpr35 PE=2 SV=1	8.63	34.1	8.14332	1	1	0.125	0	2	0.0078125	-2	-0.0078125
Q9ESX5	H/ACA ribonucleoprotein complex subunit DKC1 OS=Mus musculus OX=10090 GN=Dkc1 PE=1 SV=4	9.28	57.4	3.14342	1	1	0.125	0	2	0.0078125	-2	-0.0078125
Q9JHI2	tRNA-specific adenosine deaminase 1 OS=Mus musculus OX=10090 GN=Adat1 PE=1 SV=1	8.16	55.3	4.00802	1	1	0.125	0	2	0.0078125	-2	-0.0078125
Q9JHS4	ATP-dependent Clp protease ATP-binding subunit clpX-like, mitochondrial OS=Mus musculus OX=10090 GN=Clpx PE=1 SV=2	7.71	69.2	5.99369	1	1	0.125	0	2	0.0078125	-2	-0.0078125
Q9JHW2	Omega-amidase NIT2 OS=Mus musculus OX=10090 GN=Nit2 PE=1 SV=1	6.9	30.5	13.7681	1	1	0.125	0	2	0.0078125	-2	-0.0078125
Q9JIB0	Ran guanine nucleotide release factor OS=Mus musculus OX=10090 GN=Rangrf PE=1 SV=1	5.45	20.4	9.72973	1	1	0.125	0	2	0.0078125	-2	-0.0078125
Q9JJ59	ABC-type oligopeptide transporter ABCB9 OS=Mus musculus OX=10090 GN=Abcb9 PE=2 SV=1	7.62	83.9	5.11811	1	1	0.125	0	2	0.0078125	-2	-0.0078125
Q9JJZ5	Epidermal growth factor-like protein 6 OS=Mus musculus OX=10090 GN=Egfl6 PE=1 SV=1	8.32	61.5	5.09091	1	1	0.125	0	2	0.0078125	-2	-0.0078125
Q9JK91	DNA mismatch repair protein Mlh1 OS=Mus musculus OX=10090 GN=Mlh1 PE=1 SV=2	5.62	84.6	3.28947	1	1	0.125	0	2	0.0078125	-2	-0.0078125
Q9JKB3	Y-box-binding protein 3 OS=Mus musculus OX=10090 GN=Ybx3 PE=1 SV=2	9.69	38.8	4.15512	6	1	0.125	0	2	0.0078125	-2	-0.0078125
Q9JM54	Phorbol-12-myristate-13-acetate-induced protein 1 OS=Mus musculus OX=10090 GN=Pmaip1 PE=1 SV=1	10.74	11.6	22.3301	1	1	0.125	0	2	0.0078125	-2	-0.0078125
Q9QUI0	Transforming protein RhoA OS=Mus musculus OX=10090 GN=Rhoa PE=1 SV=1	6.1	21.8	6.21762	4	1	0.125	0	2	0.0078125	-2	-0.0078125
Q9QXD6	Fructose-1,6-bisphosphatase 1 OS=Mus musculus OX=10090 GN=Fbp1 PE=1 SV=3	6.57	36.9	3.84615	1	1	0.125	0	2	0.0078125	-2	-0.0078125
Q9QXS1	Plectin OS=Mus musculus OX=10090 GN=Plec PE=1 SV=3	5.96	533.9	0.405031	1	1	0.125	0	2	0.0078125	-2	-0.0078125
Q9QY00	Olfactory receptor 154 OS=Mus musculus OX=10090 GN=Olfr154 PE=1 SV=2	8.66	35.9	10.3774	1	1	0.125	0	2	0.0078125	-2	-0.0078125
Q9QY81	Nuclear pore membrane glycoprotein 210 OS=Mus musculus OX=10090 GN=Nup210 PE=1 SV=2	6.65	204	1.27253	3	2	0.125	0	2	0.0078125	-2	-0.0078125
Q9QY96	Extracellular calcium-sensing receptor OS=Mus musculus OX=10090 GN=Casr PE=1 SV=2	6.07	120.8	3.70714	1	1	0.125	0	2	0.0078125	-2	-0.0078125
Q9QYE5	Protein jagged-2 OS=Mus musculus OX=10090 GN=Jag2 PE=2 SV=2	5.88	134.7	5.61347	2	2	0.125	0	2	0.0078125	-2	-0.0078125
Q9QYK9	Calcium/calmodulin-dependent protein kinase type 1B OS=Mus musculus OX=10090 GN=Pnck PE=1 SV=1	6.47	38.5	7.28863	1	1	0.125	0	2	0.0078125	-2	-0.0078125
Q9QZE7	Translin-associated protein X OS=Mus musculus OX=10090 GN=Tsnax PE=1 SV=1	6.55	32.9	6.55172	1	1	0.125	0	2	0.0078125	-2	-0.0078125
Q9QZR9	Collagen alpha-4(IV) chain OS=Mus musculus OX=10090 GN=Col4a4 PE=1 SV=1	8.54	164	1.42687	1	1	0.125	0	2	0.0078125	-2	-0.0078125
Q9QZS0	Collagen alpha-3(IV) chain OS=Mus musculus OX=10090 GN=Col4a3 PE=1 SV=2	9.48	161.6	2.27681	1	1	0.125	0	2	0.0078125	-2	-0.0078125
Q9QZS5	Serine/threonine-protein kinase Sgk2 OS=Mus musculus OX=10090 GN=Sgk2 PE=1 SV=1	6.47	41.3	2.99728	1	1	0.125	0	2	0.0078125	-2	-0.0078125
Q9QZV9	NTF2-related export protein 1 OS=Mus musculus OX=10090 GN=Nxt1 PE=1 SV=2	5.03	15.8	19.2857	1	1	0.125	0	2	0.0078125	-2	-0.0078125
Q9R0G6	Cartilage oligomeric matrix protein OS=Mus musculus OX=10090 GN=Comp PE=1 SV=2	4.64	82.3	1.98675	1	1	0.125	0	2	0.0078125	-2	-0.0078125
Q9R0N3	Synaptotagmin-11 OS=Mus musculus OX=10090 GN=Syt11 PE=1 SV=2	9.11	48.3	6.04651	1	1	0.125	0	2	0.0078125	-2	-0.0078125
Q9R0X2	ADAM DEC1 OS=Mus musculus OX=10090 GN=Adamdec1 PE=2 SV=1	8.48	52.9	3.85439	1	1	0.125	0	2	0.0078125	-2	-0.0078125
Q9R1A8	E3 ubiquitin-protein ligase COP1 OS=Mus musculus OX=10090 GN=Cop1 PE=1 SV=2	6.92	80.4	3.13779	1	1	0.125	0	2	0.0078125	-2	-0.0078125
Q9R1P0	Proteasome subunit alpha type-4 OS=Mus musculus OX=10090 GN=Psma4 PE=1 SV=1	7.72	29.5	3.06513	1	1	0.125	0	2	0.0078125	-2	-0.0078125
Q9WTS4	Teneurin-1 OS=Mus musculus OX=10090 GN=Tenm1 PE=1 SV=1	6.37	305.6	0.988649	1	1	0.125	0	2	0.0078125	-2	-0.0078125
Q9WU38	Amiloride-sensitive sodium channel subunit beta OS=Mus musculus OX=10090 GN=Scnn1b PE=1 SV=1	6.09	72.1	5.79937	1	1	0.125	0	2	0.0078125	-2	-0.0078125
Q9WU60	Attractin OS=Mus musculus OX=10090 GN=Atrn PE=1 SV=3	7.27	158	2.2409	2	2	0.125	0	2	0.0078125	-2	-0.0078125
Q9WVS4	MAPK/MAK/MRK overlapping kinase OS=Mus musculus OX=10090 GN=Mok PE=1 SV=1	9.48	48	0.952381	1	1	0.125	0	2	0.0078125	-2	-0.0078125
Q9Z0N1	Eukaryotic translation initiation factor 2 subunit 3, X-linked OS=Mus musculus OX=10090 GN=Eif2s3x PE=1 SV=2	8.4	51	1.05932	1	1	0.125	0	2	0.0078125	-2	-0.0078125
Q9Z0S7	Claudin-9 OS=Mus musculus OX=10090 GN=Cldn9 PE=2 SV=2	7.06	22.9	23.0415	1	1	0.125	0	2	0.0078125	-2	-0.0078125
Q9Z1K6	E3 ubiquitin-protein ligase ARIH2 OS=Mus musculus OX=10090 GN=Arih2 PE=1 SV=1	5.69	57.7	2.23577	1	1	0.125	0	2	0.0078125	-2	-0.0078125
Q9Z1T2	Thrombospondin-4 OS=Mus musculus OX=10090 GN=Thbs4 PE=1 SV=1	4.67	106.3	2.59605	1	1	0.125	0	2	0.0078125	-2	-0.0078125
Q9Z239	Phospholemman OS=Mus musculus OX=10090 GN=Fxyd1 PE=1 SV=1	8.54	10.3	63.0435	2	2	0.125	0	2	0.0078125	-2	-0.0078125
Q9Z319	Atrial natriuretic peptide-converting enzyme OS=Mus musculus OX=10090 GN=Corin PE=2 SV=2	5.39	122.9	1.97664	1	1	0.125	0	2	0.0078125	-2	-0.0078125
Z4YJJ5	Deubiquitinating enzyme CYLD OS=Mus musculus OX=10090 GN=Cyld PE=1 SV=1	5.63	106.8	1.98953	1	1	0.125	0	2	0.0078125	-2	-0.0078125
Z4YN62	Ataxin-7-like protein 3 (Fragment) OS=Mus musculus OX=10090 GN=Atxn7l3 PE=1 SV=1	7.03	39	10.2857	1	1	0.125	0	2	0.0078125	-2	-0.0078125
A0A087WPA0	LBH domain-containing 1 OS=Mus musculus OX=10090 GN=Lbhd1 PE=4 SV=1	4.35	28.7	35.1351	27	4	1.5	0.125	1.69231	1.11719	-1.69231	-1.11719
Q9JL35	High mobility group nucleosome-binding domain-containing protein 5 OS=Mus musculus OX=10090 GN=Hmgn5 PE=1 SV=2	4.37	45.3	8.867	22	2	1.25	0.125	1.63636	0.773438	-1.63636	-0.773438
P18608	Non-histone chromosomal protein HMG-14 OS=Mus musculus OX=10090 GN=Hmgn1 PE=1 SV=2	9.76	10.1	31.25	36	1	2.25	0.25	1.6	2.5	-1.6	-2.5	4.08061	0.0155903	Hmgn1
Q8K4Z3	NAD(P)H-hydrate epimerase OS=Mus musculus OX=10090 GN=Naxe PE=1 SV=1	7.69	31	4.25532	35	1	1	0.125	1.55556	0.492188	-1.55556	-0.492188	2.9372	0.0498344	Naxe
P63137	Gamma-aminobutyric acid receptor subunit beta-2 OS=Mus musculus OX=10090 GN=Gabrb2 PE=1 SV=2	9.31	59.2	1.36719	17	1	0.875	0.125	1.5	0.375	-1.5	-0.375
Q9CXW4	60S ribosomal protein L11 OS=Mus musculus OX=10090 GN=Rpl11 PE=1 SV=4	9.6	20.2	7.86517	18	1	1.5	0.25	1.42857	1.09375	-1.42857	-1.09375	3.78952	0.0208113	Rpl11
E9PZG0	Apolipoprotein L 11a OS=Mus musculus OX=10090 GN=Apol11a PE=3 SV=1	8.31	37.3	2.99401	21	1	1.25	0.25	1.33333	0.75	-1.33333	-0.75
A2ARP8	Microtubule-associated protein 1A OS=Mus musculus OX=10090 GN=Map1a PE=1 SV=1	5.01	325.7	1.59257	11	2	0.625	0.125	1.33333	0.1875	-1.33333	-0.1875
Q60972	Histone-binding protein RBBP4 OS=Mus musculus OX=10090 GN=Rbbp4 PE=1 SV=5	4.89	47.6	4.94118	10	2	0.625	0.125	1.33333	0.1875	-1.33333	-0.1875
Q8K2C9	Very-long-chain (3R)-3-hydroxyacyl-CoA dehydratase 3 OS=Mus musculus OX=10090 GN=Hacd3 PE=1 SV=2	9.13	43.1	8.01105	17	2	0.625	0.125	1.33333	0.1875	-1.33333	-0.1875
D3YXH0	Predicted gene, 49948 OS=Mus musculus OX=10090 GN=Gm49948 PE=4 SV=1	5.95	32.6	3.3557	35	1	1.75	0.375	1.29412	1.46094	-1.29412	-1.46094	6.66821	0.00146213	Gm49948
P06801	NADP-dependent malic enzyme OS=Mus musculus OX=10090 GN=Me1 PE=1 SV=2	7.44	63.9	4.72028	29	2	1.625	0.375	1.25	1.25	-1.25	-1.25
Q9R0Q7	Prostaglandin E synthase 3 OS=Mus musculus OX=10090 GN=Ptges3 PE=1 SV=1	4.55	18.7	26.25	20	3	1	0.25	1.2	0.46875	-1.2	-0.46875	3.17883	0.0387469	Ptges3
A0A087WRV2	Keratin-associated protein 5-2 OS=Mus musculus OX=10090 GN=Krtap5-2 PE=4 SV=1	7.87	31.6	48.2289	11	4	1	0.25	1.2	0.46875	-1.2	-0.46875
P10852	4F2 cell-surface antigen heavy chain OS=Mus musculus OX=10090 GN=Slc3a2 PE=1 SV=1	5.91	58.3	10.2662	11	2	0.5	0.125	1.2	0.117188	-1.2	-0.117188
Q80YW0	Cytohesin-4 OS=Mus musculus OX=10090 GN=Cyth4 PE=1 SV=1	6.65	45.3	4.07125	9	1	0.5	0.125	1.2	0.117188	-1.2	-0.117188
Q8CAQ8	MICOS complex subunit Mic60 OS=Mus musculus OX=10090 GN=Immt PE=1 SV=1	6.61	83.8	4.75561	5	1	0.5	0.125	1.2	0.117188	-1.2	-0.117188
Q91WD5	NADH dehydrogenase [ubiquinone] iron-sulfur protein 2, mitochondrial OS=Mus musculus OX=10090 GN=Ndufs2 PE=1 SV=1	6.99	52.6	3.88769	8	2	0.5	0.125	1.2	0.117188	-1.2	-0.117188
Q9CPQ1	Cytochrome c oxidase subunit 6C OS=Mus musculus OX=10090 GN=Cox6c PE=1 SV=3	10.14	8.5	9.21053	31	1	1.375	0.375	1.14286	0.875	-1.14286	-0.875	4.43694	0.0110182	Cox6c
O08749	Dihydrolipoyl dehydrogenase, mitochondrial OS=Mus musculus OX=10090 GN=Dld PE=1 SV=2	7.9	54.2	8.6444	16	3	1.25	0.375	1.07692	0.710938	-1.07692	-0.710938
Q8K003	Translation machinery-associated protein 7 OS=Mus musculus OX=10090 GN=Tma7 PE=3 SV=1	9.99	7.1	20.3125	26	1	1.25	0.375	1.07692	0.710938	-1.07692	-0.710938
P28663	Beta-soluble NSF attachment protein OS=Mus musculus OX=10090 GN=Napb PE=1 SV=2	5.47	33.5	30.2013	37	5	1.625	0.5	1.05882	1.19531	-1.05882	-1.19531
P80314	T-complex protein 1 subunit beta OS=Mus musculus OX=10090 GN=Cct2 PE=1 SV=4	6.4	57.4	12.5234	39	5	1.875	0.625	1	1.5625	-1	-1.5625
P51863	V-type proton ATPase subunit d 1 OS=Mus musculus OX=10090 GN=Atp6v0d1 PE=1 SV=2	5	40.3	5.69801	19	2	1.125	0.375	1	0.5625	-1	-0.5625
Q3UGX2	Spectrin beta chain OS=Mus musculus OX=10090 GN=Sptb PE=1 SV=1	5.49	267.9	2.01803	17	1	0.75	0.25	1	0.25	-1	-0.25	2.98788	0.0472596	Pdap1
P99028	Cytochrome b-c1 complex subunit 6, mitochondrial OS=Mus musculus OX=10090 GN=Uqcrh PE=1 SV=2	4.87	10.4	20.2247	11	1	0.75	0.25	1	0.25	-1	-0.25
Q91VA7	Isocitrate dehydrogenase [NAD] subunit, mitochondrial OS=Mus musculus OX=10090 GN=Idh3b PE=1 SV=1	8.6	42.2	4.6875	16	2	0.75	0.25	1	0.25	-1	-0.25
A0A1B0GR81	RING finger protein 223 OS=Mus musculus OX=10090 GN=Rnf223 PE=4 SV=1	9.04	27.2	3.92157	6	1	0.375	0.125	1	0.0625	-1	-0.0625
A2AQP0	Myosin-7B OS=Mus musculus OX=10090 GN=Myh7b PE=3 SV=1	5.88	221.4	2.52447	5	3	0.375	0.125	1	0.0625	-1	-0.0625
A2AS89	Agmatinase, mitochondrial OS=Mus musculus OX=10090 GN=Agmat PE=1 SV=1	7.87	38.2	1.11732	6	1	0.375	0.125	1	0.0625	-1	-0.0625
E9Q5M6	Cilia- and flagella-associated protein 44 OS=Mus musculus OX=10090 GN=Cfap44 PE=2 SV=1	5.53	211.4	0.379816	6	1	0.375	0.125	1	0.0625	-1	-0.0625
O35250	Exocyst complex component 7 OS=Mus musculus OX=10090 GN=Exoc7 PE=1 SV=2	6.98	79.9	2.72597	6	2	0.375	0.125	1	0.0625	-1	-0.0625
Q61043	Ninein OS=Mus musculus OX=10090 GN=Nin PE=1 SV=4	5	243.6	2.177	4	4	0.375	0.125	1	0.0625	-1	-0.0625
Q61554	Fibrillin-1 OS=Mus musculus OX=10090 GN=Fbn1 PE=1 SV=2	4.92	312.1	7.62269	8	7	0.375	0.125	1	0.0625	-1	-0.0625
Q7TQ95	Endoplasmic reticulum junction formation protein lunapark OS=Mus musculus OX=10090 GN=Lnpk PE=1 SV=1	5.27	47.5	1.88235	8	1	0.375	0.125	1	0.0625	-1	-0.0625
Q8VCK6	Free fatty acid receptor 2 OS=Mus musculus OX=10090 GN=Ffar2 PE=1 SV=1	9.03	37.1	20.303	5	2	0.375	0.125	1	0.0625	-1	-0.0625
Q91XQ0	Dynein axonemal heavy chain 8 OS=Mus musculus OX=10090 GN=Dnah8 PE=1 SV=2	6.18	540.9	0.908899	5	4	0.375	0.125	1	0.0625	-1	-0.0625
Q9CWD8	Iron-sulfur protein NUBPL OS=Mus musculus OX=10090 GN=Nubpl PE=1 SV=2	9.07	34.1	1.25392	8	1	0.375	0.125	1	0.0625	-1	-0.0625
Q9D3R6	Katanin p60 ATPase-containing subunit A-like 2 OS=Mus musculus OX=10090 GN=Katnal2 PE=2 SV=2	7.52	61.1	6.86456	20	1	0.375	0.125	1	0.0625	-1	-0.0625
P35980	60S ribosomal protein L18 OS=Mus musculus OX=10090 GN=Rpl18 PE=1 SV=3	11.78	21.6	13.8298	16	2	1	0.375	0.909091	0.429688	-0.909091	-0.429688
O88844	Isocitrate dehydrogenase [NADP] cytoplasmic OS=Mus musculus OX=10090 GN=Idh1 PE=1 SV=2	7.17	46.6	12.8019	44	4	1.25	0.5	0.857143	0.65625	-0.857143	-0.65625	3.78591	0.0208867	Idh1
O55023	Inositol monophosphatase 1 OS=Mus musculus OX=10090 GN=Impa1 PE=1 SV=1	5.19	30.4	3.97112	20	1	1.25	0.5	0.857143	0.65625	-0.857143	-0.65625
P62702	40S ribosomal protein S4, X isoform OS=Mus musculus OX=10090 GN=Rps4x PE=1 SV=2	10.15	29.6	6.84411	14	2	0.625	0.25	0.857143	0.164062	-0.857143	-0.164062
Q9CZ91	Serum response factor-binding protein 1 OS=Mus musculus OX=10090 GN=Srfbp1 PE=1 SV=1	9.54	48.7	6.34921	16	1	0.625	0.25	0.857143	0.164062	-0.857143	-0.164062
Q9DCW5	Cytochrome c oxidase subunit OS=Mus musculus OX=10090 GN=Cox6a1 PE=1 SV=1	9.98	12.5	25.8929	18	1	0.625	0.25	0.857143	0.164062	-0.857143	-0.164062
Q3UE92	Xaa-Pro aminopeptidase 1 OS=Mus musculus OX=10090 GN=Xpnpep1 PE=1 SV=1	5.83	74.5	3.75375	33	2	1.5	0.625	0.823529	0.929688	-0.823529	-0.929688
P62908	40S ribosomal protein S3 OS=Mus musculus OX=10090 GN=Rps3 PE=1 SV=1	9.66	26.7	4.11523	17	1	0.875	0.375	0.8	0.3125	-0.8	-0.3125
O35316	Sodium- and chloride-dependent taurine transporter OS=Mus musculus OX=10090 GN=Slc6a6 PE=1 SV=2	7.23	69.8	4.1868	33	1	1.125	0.5	0.769231	0.507812	-0.769231	-0.507812	4.01134	0.0166924	Slc6a6
Q76MZ3	Serine/threonine-protein phosphatase 2A 65 kDa regulatory subunit A alpha isoform OS=Mus musculus OX=10090 GN=Ppp2r1a PE=1 SV=3	5.11	65.3	13.073	36	6	1.125	0.5	0.769231	0.507812	-0.769231	-0.507812
G3X905	G protein-coupled receptor kinase OS=Mus musculus OX=10090 GN=Grk1 PE=1 SV=1	5.54	63.8	18.7943	134	8	5.25	2.5	0.709677	10.6562	-0.709677	-10.6562
Q569Z6	Thyroid hormone receptor-associated protein 3 OS=Mus musculus OX=10090 GN=Thrap3 PE=1 SV=1	10.17	108.1	1.78759	32	1	1	0.5	0.666667	0.375	-0.666667	-0.375
Q8BVI4	Dihydropteridine reductase OS=Mus musculus OX=10090 GN=Qdpr PE=1 SV=2	7.81	25.6	11.2033	41	2	1	0.5	0.666667	0.375	-0.666667	-0.375
P97351	40S ribosomal protein S3a OS=Mus musculus OX=10090 GN=Rps3a PE=1 SV=3	9.73	29.9	13.2576	24	3	0.75	0.375	0.666667	0.210938	-0.666667	-0.210938
Q68FG2	Spectrin beta chain OS=Mus musculus OX=10090 GN=Sptbn2 PE=1 SV=1	5.86	270.8	2.63819	18	1	0.75	0.375	0.666667	0.210938	-0.666667	-0.210938
Q00915	Retinol-binding protein 1 OS=Mus musculus OX=10090 GN=Rbp1 PE=1 SV=2	5.25	15.8	8.88889	12	1	0.5	0.25	0.666667	0.09375	-0.666667	-0.09375
Q9CZD3	Glycine--tRNA ligase OS=Mus musculus OX=10090 GN=Gars1 PE=1 SV=1	6.65	81.8	4.52675	20	2	0.5	0.25	0.666667	0.09375	-0.666667	-0.09375
A0A1B0GT06	Predicted gene, 29735 OS=Mus musculus OX=10090 GN=Gm29735 PE=4 SV=1	7.83	21.2	41.0959	5	3	0.25	0.125	0.666667	0.0234375	-0.666667	-0.0234375
A0A1Y7VJB9	Dual-specificity protein phosphatase CDC14B OS=Mus musculus OX=10090 GN=Cdc14b PE=1 SV=1	8.6	56.1	6.50407	4	2	0.25	0.125	0.666667	0.0234375	-0.666667	-0.0234375
A0A338P7H8	Beta-1,4-galactosyltransferase 4 (Fragment) OS=Mus musculus OX=10090 GN=B4galt4 PE=1 SV=1	8.12	26.4	15.4867	3	2	0.25	0.125	0.666667	0.0234375	-0.666667	-0.0234375
A2A690	Protein TANC2 OS=Mus musculus OX=10090 GN=Tanc2 PE=1 SV=1	7.97	220.1	0.401204	8	1	0.25	0.125	0.666667	0.0234375	-0.666667	-0.0234375
A7TU71	Protein Shroom2 OS=Mus musculus OX=10090 GN=Shroom2 PE=1 SV=1	6.7	165.2	0.605245	3	1	0.25	0.125	0.666667	0.0234375	-0.666667	-0.0234375
D3Z3H1	Sacsin OS=Mus musculus OX=10090 GN=Sacs PE=1 SV=1	6.6	82.8	7.51678	3	2	0.25	0.125	0.666667	0.0234375	-0.666667	-0.0234375
D3Z6E3	Carbohydrate sulfotransferase OS=Mus musculus OX=10090 GN=Chst13 PE=3 SV=2	10.26	39	9.22619	3	2	0.25	0.125	0.666667	0.0234375	-0.666667	-0.0234375
E9Q5I3	Mucin 5, subtype B, tracheobronchial OS=Mus musculus OX=10090 GN=Muc5b PE=1 SV=1	5.73	515.1	2.70833	5	5	0.25	0.125	0.666667	0.0234375	-0.666667	-0.0234375
O08899	Regulator of G-protein signaling 4 OS=Mus musculus OX=10090 GN=Rgs4 PE=2 SV=1	8.48	23.3	3.41463	4	1	0.25	0.125	0.666667	0.0234375	-0.666667	-0.0234375
P00184	Cytochrome P450 1A1 OS=Mus musculus OX=10090 GN=Cyp1a1 PE=1 SV=2	8.06	59.2	2.29008	7	1	0.25	0.125	0.666667	0.0234375	-0.666667	-0.0234375
P11087	Collagen alpha-1(I) chain OS=Mus musculus OX=10090 GN=Col1a1 PE=1 SV=4	5.85	137.9	8.39642	5	4	0.25	0.125	0.666667	0.0234375	-0.666667	-0.0234375
P32304	5-hydroxytryptamine receptor 7 OS=Mus musculus OX=10090 GN=Htr7 PE=2 SV=2	8.66	49.9	0.892857	5	1	0.25	0.125	0.666667	0.0234375	-0.666667	-0.0234375
P50636	E3 ubiquitin-protein ligase RNF19A OS=Mus musculus OX=10090 GN=Rnf19a PE=1 SV=2	6.93	90.6	2.85714	3	1	0.25	0.125	0.666667	0.0234375	-0.666667	-0.0234375
P62855	40S ribosomal protein S26 OS=Mus musculus OX=10090 GN=Rps26 PE=1 SV=3	11	13	24.3478	4	2	0.25	0.125	0.666667	0.0234375	-0.666667	-0.0234375
Q01705	Neurogenic locus notch homolog protein 1 OS=Mus musculus OX=10090 GN=Notch1 PE=1 SV=3	5.1	270.7	1.54089	3	1	0.25	0.125	0.666667	0.0234375	-0.666667	-0.0234375
Q04592	Proprotein convertase subtilisin/kexin type 5 OS=Mus musculus OX=10090 GN=Pcsk5 PE=1 SV=3	6.09	209.1	5.86042	5	5	0.25	0.125	0.666667	0.0234375	-0.666667	-0.0234375
Q5XJV5	Nuclear receptor coactivator 6 OS=Mus musculus OX=10090 GN=Ncoa6 PE=1 SV=1	9.35	219.8	4.10826	4	3	0.25	0.125	0.666667	0.0234375	-0.666667	-0.0234375
Q8BWF0	Succinate-semialdehyde dehydrogenase, mitochondrial OS=Mus musculus OX=10090 GN=Aldh5a1 PE=1 SV=1	8.25	55.9	5.35373	4	2	0.25	0.125	0.666667	0.0234375	-0.666667	-0.0234375
Q8C015	Serine/threonine-protein kinase PAK 5 OS=Mus musculus OX=10090 GN=Pak5 PE=1 SV=1	8.21	80.9	3.05981	4	2	0.25	0.125	0.666667	0.0234375	-0.666667	-0.0234375
Q8VFM9	Olfactory receptor 24 OS=Mus musculus OX=10090 GN=Olfr24 PE=2 SV=1	8.79	34.8	2.55591	6	1	0.25	0.125	0.666667	0.0234375	-0.666667	-0.0234375
Q924A2	Protein capicua homolog OS=Mus musculus OX=10090 GN=Cic PE=1 SV=2	8.02	258	1.11554	5	1	0.25	0.125	0.666667	0.0234375	-0.666667	-0.0234375
Q99KZ6	Zinc finger protein 639 OS=Mus musculus OX=10090 GN=Znf639 PE=1 SV=1	5.83	55.6	2.68041	4	1	0.25	0.125	0.666667	0.0234375	-0.666667	-0.0234375
Q9D0K2	Succinyl-CoA:3-ketoacid coenzyme A transferase 1, mitochondrial OS=Mus musculus OX=10090 GN=Oxct1 PE=1 SV=1	8.53	56	2.30769	7	1	0.25	0.125	0.666667	0.0234375	-0.666667	-0.0234375
T1ECW4	RNA-binding protein with multiple-splicing OS=Mus musculus OX=10090 GN=Rbpms PE=1 SV=1	7.78	20.7	24.0838	3	2	0.25	0.125	0.666667	0.0234375	-0.666667	-0.0234375
F7CXR7	2'-5'-oligoadenylate synthase 3 (Fragment) OS=Mus musculus OX=10090 GN=Oas3 PE=1 SV=1	8.28	14.8	3.05344	38	1	1.625	0.875	0.6	0.9375	-0.6	-0.9375
P12787	Cytochrome c oxidase subunit 5A, mitochondrial OS=Mus musculus OX=10090 GN=Cox5a PE=1 SV=2	6.54	16.1	21.9178	121	2	4.625	2.625	0.551724	7.25	-0.551724	-7.25
Q8BMF4	Dihydrolipoyllysine-residue acetyltransferase component of pyruvate dehydrogenase complex, mitochondrial OS=Mus musculus OX=10090 GN=Dlat PE=1 SV=2	8.57	67.9	9.81308	36	4	1.75	1	0.545455	1.03125	-0.545455	-1.03125
Q9CWW7	CXXC-type zinc finger protein 1 OS=Mus musculus OX=10090 GN=Cxxc1 PE=1 SV=1	8.27	76.1	1.66667	11	1	0.875	0.5	0.545455	0.257812	-0.545455	-0.257812
Q06185	ATP synthase subunit e, mitochondrial OS=Mus musculus OX=10090 GN=Atp5me PE=1 SV=2	9.35	8.2	16.9014	37	1	1.5	0.875	0.526316	0.742188	-0.526316	-0.742188
Q8K4G1	Latent-transforming growth factor beta-binding protein 4 OS=Mus musculus OX=10090 GN=Ltbp4 PE=1 SV=2	5.47	178.5	1.32053	47	1	1.5	0.875	0.526316	0.742188	-0.526316	-0.742188
Q921F2	TAR DNA-binding protein 43 OS=Mus musculus OX=10090 GN=Tardbp PE=1 SV=1	6.7	44.5	12.0773	43	4	1.5	0.875	0.526316	0.742188	-0.526316	-0.742188
Q9CPU0	Lactoylglutathione lyase OS=Mus musculus OX=10090 GN=Glo1 PE=1 SV=3	5.47	20.8	60.8696	257	9	8.125	4.875	0.5	21.125	-0.5	-21.125
P63082	V-type proton ATPase 16 kDa proteolipid subunit c OS=Mus musculus OX=10090 GN=Atp6v0c PE=1 SV=1	9.13	15.8	11.6129	91	1	3.5	2.125	0.488889	3.86719	-0.488889	-3.86719
E9QAC8	Glutathione S-transferase Mu 7 (Fragment) OS=Mus musculus OX=10090 GN=Gstm7 PE=1 SV=1	7.12	22.3	29.5337	61	1	2.25	1.375	0.482759	1.58594	-0.482759	-1.58594	4.61936	0.00924962	Gstm7
Q9DB05	Alpha-soluble NSF attachment protein OS=Mus musculus OX=10090 GN=Napa PE=1 SV=1	5.45	33.2	13.2203	70	1	2	1.25	0.461538	1.21875	-0.461538	-1.21875
F7DEU6	Inosine-5'-monophosphate dehydrogenase OS=Mus musculus OX=10090 GN=Impdh1 PE=1 SV=2	6.89	57.7	10.223	22	3	1	0.625	0.461538	0.304688	-0.461538	-0.304688
P24604	Tyrosine-protein kinase Tec OS=Mus musculus OX=10090 GN=Tec PE=1 SV=2	8.66	73.4	3.80952	25	2	1	0.625	0.461538	0.304688	-0.461538	-0.304688
Q5XG69	Soluble lamin-associated protein of 75 kDa OS=Mus musculus OX=10090 GN=Fam169a PE=1 SV=3	4.68	73.2	9.02256	203	5	7.125	4.625	0.425532	14.6875	-0.425532	-14.6875
P97370	Sodium/potassium-transporting ATPase subunit beta-3 OS=Mus musculus OX=10090 GN=Atp1b3 PE=1 SV=1	8.51	31.8	14.7482	65	3	2.5	1.625	0.424242	1.80469	-0.424242	-1.80469
Q4VWZ5	Acyl-CoA-binding protein OS=Mus musculus OX=10090 GN=Dbi PE=1 SV=1	9.13	15.2	29.6296	88	3	3	2	0.4	2.5	-0.4	-2.5
Q9EQU5	Protein SET OS=Mus musculus OX=10090 GN=Set PE=1 SV=1	4.32	33.4	8.3045	61	2	2.25	1.5	0.4	1.40625	-0.4	-1.40625
Q3UHX2	28 kDa heat- and acid-stable phosphoprotein OS=Mus musculus OX=10090 GN=Pdap1 PE=1 SV=1	7.39	20.6	11.0497	30	1	0.75	0.5	0.4	0.15625	-0.4	-0.15625
Q80XH2	Interphotoreceptor matrix proteoglycan 2 OS=Mus musculus OX=10090 GN=Impg2 PE=1 SV=1	4.78	138	2.01126	20	2	0.375	0.25	0.4	0.0390625	-0.4	-0.0390625	7.22666	0.00091635	Impg2
A0A0G2JEE5	T cell receptor alpha joining 50 (Fragment) OS=Mus musculus OX=10090 GN=Traj50 PE=4 SV=1	9	2.1	61.9048	11	1	0.375	0.25	0.4	0.0390625	-0.4	-0.0390625
A0A1B0GS71	Predicted gene 45337 OS=Mus musculus OX=10090 GN=Gm45337 PE=4 SV=1	7.83	25	42.5856	5	3	0.375	0.25	0.4	0.0390625	-0.4	-0.0390625
A2AN08	E3 ubiquitin-protein ligase UBR4 OS=Mus musculus OX=10090 GN=Ubr4 PE=1 SV=1	6.06	571.9	0.521236	7	1	0.375	0.25	0.4	0.0390625	-0.4	-0.0390625
E9Q9M0	Centrosomal protein of 290 kDa OS=Mus musculus OX=10090 GN=Cep290 PE=1 SV=1	6.21	289.8	0.806777	13	2	0.375	0.25	0.4	0.0390625	-0.4	-0.0390625
P58252	Elongation factor 2 OS=Mus musculus OX=10090 GN=Eef2 PE=1 SV=2	6.83	95.3	3.7296	7	1	0.375	0.25	0.4	0.0390625	-0.4	-0.0390625
Q4U4S6	Xin actin-binding repeat-containing protein 2 OS=Mus musculus OX=10090 GN=Xirp2 PE=1 SV=1	6.18	428	1.03066	9	2	0.375	0.25	0.4	0.0390625	-0.4	-0.0390625
Q8BZ47	Zinc finger protein 609 OS=Mus musculus OX=10090 GN=Znf609 PE=1 SV=2	8	151	1.76929	8	2	0.375	0.25	0.4	0.0390625	-0.4	-0.0390625
Q8K310	Matrin-3 OS=Mus musculus OX=10090 GN=Matr3 PE=1 SV=1	6.25	94.6	10.7565	20	5	0.375	0.25	0.4	0.0390625	-0.4	-0.0390625
Q8R1F1	Protein Niban 2 OS=Mus musculus OX=10090 GN=Niban2 PE=1 SV=2	5.94	84.8	1.33511	8	1	0.375	0.25	0.4	0.0390625	-0.4	-0.0390625
P14231	Sodium/potassium-transporting ATPase subunit beta-2 OS=Mus musculus OX=10090 GN=Atp1b2 PE=1 SV=2	8.31	33.3	17.5862	178	3	5.875	4	0.379747	9.25781	-0.379747	-9.25781
F6SLR4	Testican-2 OS=Mus musculus OX=10090 GN=Spock2 PE=1 SV=1	4.98	46.8	1.89125	48	1	1.625	1.125	0.363636	0.6875	-0.363636	-0.6875
H7BX95	Serine/arginine-rich splicing factor 1 OS=Mus musculus OX=10090 GN=Srsf1 PE=1 SV=1	10.08	28.3	16.996	51	3	1.625	1.125	0.363636	0.6875	-0.363636	-0.6875
Q9R0P5	Destrin OS=Mus musculus OX=10090 GN=Dstn PE=1 SV=3	7.97	18.5	6.66667	48	1	1.25	0.875	0.352941	0.398438	-0.352941	-0.398438	5.41037	0.00442302	Dstn
P48774	Glutathione S-transferase Mu 5 OS=Mus musculus OX=10090 GN=Gstm5 PE=1 SV=1	7.21	26.6	9.375	65	1	2.125	1.5	0.344828	1.13281	-0.344828	-1.13281
Q62425	Cytochrome c oxidase subunit NDUFA4 OS=Mus musculus OX=10090 GN=Ndufa4 PE=1 SV=2	9.52	9.3	46.3415	193	4	6.875	4.875	0.340426	11.75	-0.340426	-11.75
O35381	Acidic leucine-rich nuclear phosphoprotein 32 family member A OS=Mus musculus OX=10090 GN=Anp32a PE=1 SV=1	4.07	28.5	28.7449	268	7	9.625	6.875	0.333333	22.6875	-0.333333	-22.6875
Q8BKC5	Importin-5 OS=Mus musculus OX=10090 GN=Ipo5 PE=1 SV=3	4.93	123.5	5.01367	27	4	0.875	0.625	0.333333	0.1875	-0.333333	-0.1875
Q9CX86	Heterogeneous nuclear ribonucleoprotein A0 OS=Mus musculus OX=10090 GN=Hnrnpa0 PE=1 SV=1	9.31	30.5	17.377	47	2	2.25	1.625	0.322581	1.21094	-0.322581	-1.21094	4.76428	0.00805981	Hnrnpa0
Q99JF8	PC4 and SFRS1-interacting protein OS=Mus musculus OX=10090 GN=Psip1 PE=1 SV=1	9.13	59.7	9.84848	175	5	6.375	4.625	0.318182	9.625	-0.318182	-9.625
P23440	Rod cGMP-specific 3',5'-cyclic phosphodiesterase subunit beta OS=Mus musculus OX=10090 GN=Pde6b PE=2 SV=3	5.31	98.5	11.6822	205	3	7.75	5.625	0.317757	14.2109	-0.317757	-14.2109
A0A1Y7VKY1	40S ribosomal protein S18 OS=Mus musculus OX=10090 GN=Rps18-ps5 PE=3 SV=1	10.86	17.7	11.1842	42	2	1.375	1	0.315789	0.445312	-0.315789	-0.445312	3.06388	0.0436571	Rps18-ps5
Q8K0A8	Phosphodiesterase OS=Mus musculus OX=10090 GN=Pde6a PE=1 SV=1	5.55	99.5	15.9302	255	6	9.375	6.875	0.307692	20.3125	-0.307692	-20.3125
P84091	AP-2 complex subunit mu OS=Mus musculus OX=10090 GN=Ap2m1 PE=1 SV=1	9.54	49.6	8.73563	45	3	1.875	1.375	0.307692	0.8125	-0.307692	-0.8125
A2AEG6	Neuronal membrane glycoprotein M6-b OS=Mus musculus OX=10090 GN=Gpm6b PE=1 SV=1	6.14	36.2	3.96341	74	1	2.375	1.75	0.30303	1.28906	-0.30303	-1.28906
Q9D819	Inorganic pyrophosphatase OS=Mus musculus OX=10090 GN=Ppa1 PE=1 SV=1	5.6	32.6	35.9862	157	7	5	3.75	0.285714	5.46875	-0.285714	-5.46875
Q8BG39	Synaptic vesicle glycoprotein 2B OS=Mus musculus OX=10090 GN=Sv2b PE=1 SV=1	5.57	77.4	4.97804	114	2	3	2.25	0.285714	1.96875	-0.285714	-1.96875
O55022	Membrane-associated progesterone receptor component 1 OS=Mus musculus OX=10090 GN=Pgrmc1 PE=1 SV=4	4.7	21.7	7.17949	61	1	2	1.5	0.285714	0.875	-0.285714	-0.875
Q8CDN6	Thioredoxin-like protein 1 OS=Mus musculus OX=10090 GN=Txnl1 PE=1 SV=3	4.96	32.2	6.92042	33	3	1	0.75	0.285714	0.21875	-0.285714	-0.21875
Q8QZT1	Acetyl-CoA acetyltransferase, mitochondrial OS=Mus musculus OX=10090 GN=Acat1 PE=1 SV=1	8.51	44.8	13.2075	25	4	1	0.75	0.285714	0.21875	-0.285714	-0.21875
A0A0A6YWD9	Tenascin-R (Fragment) OS=Mus musculus OX=10090 GN=Tnr PE=1 SV=1	4.49	19.9	2.20994	12	1	0.5	0.375	0.285714	0.0546875	-0.285714	-0.0546875
P11679	Keratin, type II cytoskeletal 8 OS=Mus musculus OX=10090 GN=Krt8 PE=1 SV=4	5.82	54.5	14.898	17	2	0.5	0.375	0.285714	0.0546875	-0.285714	-0.0546875
Q3TDX8	Cytochrome b5 reductase 4 OS=Mus musculus OX=10090 GN=Cyb5r4 PE=2 SV=3	6.35	59.7	1.32576	14	1	0.5	0.375	0.285714	0.0546875	-0.285714	-0.0546875
Q9Z1G3	V-type proton ATPase subunit C 1 OS=Mus musculus OX=10090 GN=Atp6v1c1 PE=1 SV=4	7.46	43.9	4.71204	17	2	0.5	0.375	0.285714	0.0546875	-0.285714	-0.0546875
Q01853	Transitional endoplasmic reticulum ATPase OS=Mus musculus OX=10090 GN=Vcp PE=1 SV=4	5.26	89.3	25.062	80	12	2.625	2	0.27027	1.44531	-0.27027	-1.44531
Q9JMG7	Hepatoma-derived growth factor-related protein 3 OS=Mus musculus OX=10090 GN=Hdgfl3 PE=1 SV=2	8.4	22.4	19.3069	151	3	5.375	4.125	0.263158	5.9375	-0.263158	-5.9375
P00493	Hypoxanthine-guanine phosphoribosyltransferase OS=Mus musculus OX=10090 GN=Hprt1 PE=1 SV=3	6.68	24.6	37.6147	163	7	5	3.875	0.253521	4.99219	-0.253521	-4.99219
P20612	Guanine nucleotide-binding protein G(t) subunit alpha-1 OS=Mus musculus OX=10090 GN=Gnat1 PE=1 SV=3	5.62	39.9	53.7143	1034	12	35.125	27.375	0.248	242.188	-0.248	-242.188
P03930	ATP synthase protein 8 OS=Mus musculus OX=10090 GN=Mtatp8 PE=1 SV=1	9.88	7.8	14.9254	96	1	2.875	2.25	0.243902	1.60156	-0.243902	-1.60156
P60879	Synaptosomal-associated protein 25 OS=Mus musculus OX=10090 GN=Snap25 PE=1 SV=1	4.77	23.3	36.4078	91	6	2.875	2.25	0.243902	1.60156	-0.243902	-1.60156
P12382	ATP-dependent 6-phosphofructokinase, liver type OS=Mus musculus OX=10090 GN=Pfkl PE=1 SV=4	7.17	85.3	17.4359	282	8	9.5	7.5	0.235294	17	-0.235294	-17
P61982	14-3-3 protein gamma OS=Mus musculus OX=10090 GN=Ywhag PE=1 SV=2	4.89	28.3	44.1296	314	5	10.125	8	0.234483	19.2578	-0.234483	-19.2578
G5E924	Heterogeneous nuclear ribonucleoprotein L (Fragment) OS=Mus musculus OX=10090 GN=Hnrnpl PE=1 SV=1	8.18	66.9	38.374	430	14	13.125	10.5	0.222222	31.0078	-0.222222	-31.0078
P10922	Histone H1.0 OS=Mus musculus OX=10090 GN=H1-0 PE=2 SV=4	10.9	20.8	15.9794	309	3	10.625	8.5	0.222222	20.3203	-0.222222	-20.3203
Q9CQQ7	ATP synthase F(0) complex subunit B1, mitochondrial OS=Mus musculus OX=10090 GN=Atp5pb PE=1 SV=1	9.06	28.9	10.1562	198	3	6.25	5	0.222222	7.03125	-0.222222	-7.03125
Q6NVF4	DNA helicase B OS=Mus musculus OX=10090 GN=Helb PE=1 SV=2	5.82	121.4	0.744879	38	1	1.25	1	0.222222	0.28125	-0.222222	-0.28125
Q9CPQ8	ATP synthase subunit g, mitochondrial OS=Mus musculus OX=10090 GN=Atp5mg PE=1 SV=1	9.74	11.4	31.068	35	2	1.25	1	0.222222	0.28125	-0.222222	-0.28125
P26369	Splicing factor U2AF 65 kDa subunit OS=Mus musculus OX=10090 GN=U2af2 PE=1 SV=3	9.09	53.5	1.68421	22	1	0.625	0.5	0.222222	0.0703125	-0.222222	-0.0703125
P70670	Nascent polypeptide-associated complex subunit alpha, muscle-specific form OS=Mus musculus OX=10090 GN=Naca PE=1 SV=2	9.35	220.4	2.10334	21	4	0.625	0.5	0.222222	0.0703125	-0.222222	-0.0703125
Q02053	Ubiquitin-like modifier-activating enzyme 1 OS=Mus musculus OX=10090 GN=Uba1 PE=1 SV=1	5.66	117.7	19.3762	102	15	3.875	3.125	0.214286	2.625	-0.214286	-2.625
A2AQW0	Mitogen-activated protein kinase kinase kinase 15 OS=Mus musculus OX=10090 GN=Map3k15 PE=1 SV=1	5.36	149.2	3.30579	60	2	2	1.625	0.206897	0.679688	-0.206897	-0.679688
Q8CCT4	Transcription elongation factor A protein-like 5 OS=Mus musculus OX=10090 GN=Tceal5 PE=1 SV=1	6.2	22	14	102	1	3.375	2.75	0.204082	1.91406	-0.204082	-1.91406
P68510	14-3-3 protein eta OS=Mus musculus OX=10090 GN=Ywhah PE=1 SV=2	4.89	28.2	19.1057	194	1	6.125	5	0.202247	6.25781	-0.202247	-6.25781
Q9DBU0	Transmembrane 9 superfamily member 1 OS=Mus musculus OX=10090 GN=Tm9sf1 PE=2 SV=2	7.09	68.9	1.48515	42	1	1.375	1.125	0.2	0.3125	-0.2	-0.3125
Q9DBJ1	Phosphoglycerate mutase 1 OS=Mus musculus OX=10090 GN=Pgam1 PE=1 SV=3	7.18	28.8	56.2992	821	11	26	21.375	0.195251	109.555	-0.195251	-109.555	5.24641	0.00513972	Pgam1
P62827	GTP-binding nuclear protein Ran OS=Mus musculus OX=10090 GN=Ran PE=1 SV=3	7.49	24.4	24.537	460	5	14.875	12.25	0.193548	35.6016	-0.193548	-35.6016	3.86156	0.0193669	Ran
P27773	Protein disulfide-isomerase A3 OS=Mus musculus OX=10090 GN=Pdia3 PE=1 SV=2	6.21	56.6	12.0792	72	6	2.125	1.75	0.193548	0.726562	-0.193548	-0.726562
Q9DCX2	ATP synthase subunit d, mitochondrial OS=Mus musculus OX=10090 GN=Atp5pd PE=1 SV=3	5.69	18.7	47.205	233	6	8	6.625	0.188034	10.0547	-0.188034	-10.0547
P52480	Pyruvate kinase PKM OS=Mus musculus OX=10090 GN=Pkm PE=1 SV=4	7.47	57.8	64.4068	2148	27	69.875	58.125	0.183594	752	-0.183594	-752	8.03744	0.00047651	Pkm
A0A494B945	Ras-related protein Rab-1B (Fragment) OS=Mus musculus OX=10090 GN=Rab1b PE=1 SV=1	8.81	28.2	18.5039	111	1	3.75	3.125	0.181818	2.14844	-0.181818	-2.14844
P31648	Sodium- and chloride-dependent GABA transporter 1 OS=Mus musculus OX=10090 GN=Slc6a1 PE=1 SV=2	7.96	67	3.50584	54	1	1.5	1.25	0.181818	0.34375	-0.181818	-0.34375
P97315	Cysteine and glycine-rich protein 1 OS=Mus musculus OX=10090 GN=Csrp1 PE=1 SV=3	8.57	20.6	8.80829	59	1	1.5	1.25	0.181818	0.34375	-0.181818	-0.34375
Q9D3D9	ATP synthase subunit delta, mitochondrial OS=Mus musculus OX=10090 GN=Atp5f1d PE=1 SV=1	5.08	17.6	5.35714	49	1	1.5	1.25	0.181818	0.34375	-0.181818	-0.34375
A0A0G2JFH2	Microtubule-associated protein (Fragment) OS=Mus musculus OX=10090 GN=Map4 PE=1 SV=1	9.28	152.7	4.16378	29	1	0.75	0.625	0.181818	0.0859375	-0.181818	-0.0859375
P55258	Ras-related protein Rab-8A OS=Mus musculus OX=10090 GN=Rab8a PE=1 SV=2	9.07	23.7	28.0193	96	1	3.125	2.625	0.173913	1.4375	-0.173913	-1.4375
A0A286YDH1	Heterogeneous nuclear ribonucleoprotein K (Fragment) OS=Mus musculus OX=10090 GN=Hnrnpk PE=1 SV=1	4.61	15.8	30.7692	142	1	4.75	4	0.171429	3.28125	-0.171429	-3.28125
Q8CG71	Prolyl 3-hydroxylase 2 OS=Mus musculus OX=10090 GN=P3h2 PE=1 SV=1	5.85	80.1	0.995733	43	1	1.625	1.375	0.166667	0.375	-0.166667	-0.375
Q03265	ATP synthase subunit alpha, mitochondrial OS=Mus musculus OX=10090 GN=Atp5f1a PE=1 SV=1	9.19	59.7	42.8571	849	19	29.375	24.875	0.165899	122.062	-0.165899	-122.062	7.46401	0.000754496	Atp5f1a
G3X925	Pyruvate kinase OS=Mus musculus OX=10090 GN=Pklr PE=1 SV=1	7.09	62.2	4.70383	128	1	4.125	3.5	0.163934	2.38281	-0.163934	-2.38281	2.93706	0.0498416	Pklr
P62874	Guanine nucleotide-binding protein G(I)/G(S)/G(T) subunit beta-1 OS=Mus musculus OX=10090 GN=Gnb1 PE=1 SV=3	6	37.4	55.8824	1169	6	38	32.25	0.163701	201.969	-0.163701	-201.969
A0A1W2P768	Histone H3.2 OS=Mus musculus OX=10090 GN=H3c14 PE=1 SV=1	11.39	20.2	25.4144	301	1	10	8.5	0.162162	13.875	-0.162162	-13.875
P02301	Histone H3.3C OS=Mus musculus OX=10090 GN=H3-5 PE=3 SV=3	11.14	15.3	33.8235	301	1	10	8.5	0.162162	13.875	-0.162162	-13.875
P09405	Nucleolin OS=Mus musculus OX=10090 GN=Ncl PE=1 SV=2	4.75	76.7	21.9236	617	14	19.375	16.5	0.160279	51.5703	-0.160279	-51.5703
P48771	Cytochrome c oxidase subunit 7A2, mitochondrial OS=Mus musculus OX=10090 GN=Cox7a2 PE=1 SV=2	10.27	9.3	27.7108	103	2	3.375	2.875	0.16	1.5625	-0.16	-1.5625
Q64704	Syntaxin-3 OS=Mus musculus OX=10090 GN=Stx3 PE=1 SV=1	5.45	33.2	13.4948	114	4	3.375	2.875	0.16	1.5625	-0.16	-1.5625
P20443	S-arrestin OS=Mus musculus OX=10090 GN=Sag PE=1 SV=1	5.8	44.9	84.6154	2895	26	89.875	76.625	0.159159	1103.06	-0.159159	-1103.06	3.70089	0.0227464	Sag
C0HKE5	Histone H2A type 1-G OS=Mus musculus OX=10090 GN=H2ac11 PE=1 SV=1	11.05	14.1	55.3846	806	4	24.75	21.125	0.158038	83.1484	-0.158038	-83.1484	3.51776	0.0273715	H2ac11
Q6GT24	Peroxiredoxin-6 OS=Mus musculus OX=10090 GN=Prdx6 PE=1 SV=1	6.37	24.8	62.0536	595	12	18.375	15.75	0.153846	44.7891	-0.153846	-44.7891	4.15542	0.014486	Prdx6
Q64522	Histone H2A type 2-B OS=Mus musculus OX=10090 GN=H2ac21 PE=1 SV=3	10.89	14	53.0769	148	4	4.375	3.75	0.153846	2.53906	-0.153846	-2.53906	4.72323	0.00837939	H2ac21
Q8R1I1	Cytochrome b-c1 complex subunit 9 OS=Mus musculus OX=10090 GN=Uqcr10 PE=1 SV=1	9.19	7.4	26.5625	54	1	1.75	1.5	0.153846	0.40625	-0.153846	-0.40625
P30416	Peptidyl-prolyl cis-trans isomerase FKBP4 OS=Mus musculus OX=10090 GN=Fkbp4 PE=1 SV=5	5.72	51.5	3.27511	24	1	0.875	0.75	0.153846	0.101562	-0.153846	-0.101562
Q3U2G2	Heat shock 70 kDa protein 4 OS=Mus musculus OX=10090 GN=Hspa4 PE=1 SV=1	5.21	94.1	7.00713	26	3	0.875	0.75	0.153846	0.101562	-0.153846	-0.101562
P17879	Heat shock 70 kDa protein 1B OS=Mus musculus OX=10090 GN=Hspa1b PE=1 SV=3	5.72	70.1	12.6168	155	5	4.625	4	0.144928	2.69531	-0.144928	-2.69531
P97450	ATP synthase-coupling factor 6, mitochondrial OS=Mus musculus OX=10090 GN=Atp5pf PE=1 SV=1	9.36	12.5	43.5185	153	3	4.625	4	0.144928	2.69531	-0.144928	-2.69531
Q8VDN2	Sodium/potassium-transporting ATPase subunit alpha-1 OS=Mus musculus OX=10090 GN=Atp1a1 PE=1 SV=1	5.45	112.9	32.4536	1017	17	32.75	28.375	0.143149	133.711	-0.143149	-133.711
P63101	14-3-3 protein zeta/delta OS=Mus musculus OX=10090 GN=Ywhaz PE=1 SV=1	4.79	27.8	50.6122	637	9	20.625	17.875	0.142857	52.9375	-0.142857	-52.9375
P15499	Peripherin-2 OS=Mus musculus OX=10090 GN=Prph2 PE=1 SV=1	8.02	39.2	14.7399	174	5	5.625	4.875	0.142857	3.9375	-0.142857	-3.9375
P62814	V-type proton ATPase subunit B, brain isoform OS=Mus musculus OX=10090 GN=Atp6v1b2 PE=1 SV=1	5.81	56.5	28.3757	165	12	5.625	4.875	0.142857	3.9375	-0.142857	-3.9375
P05063	Fructose-bisphosphate aldolase C OS=Mus musculus OX=10090 GN=Aldoc PE=1 SV=4	7.12	39.4	50.6887	315	11	9.5	8.25	0.140845	11.0938	-0.140845	-11.0938	5.92115	0.00279508	Aldoc
P17751	Triosephosphate isomerase OS=Mus musculus OX=10090 GN=Tpi1 PE=1 SV=5	7.3	26.7	69.4779	1369	14	42.25	36.75	0.139241	217.25	-0.139241	-217.25
Q9D0J8	Parathymosin OS=Mus musculus OX=10090 GN=Ptms PE=1 SV=3	4.22	11.4	23.7624	165	3	5	4.375	0.133333	2.92969	-0.133333	-2.92969
Q8R480	Nuclear pore complex protein Nup85 OS=Mus musculus OX=10090 GN=Nup85 PE=1 SV=1	5.57	74.7	4.72561	98	2	3	2.625	0.133333	1.05469	-0.133333	-1.05469
P56382	ATP synthase subunit epsilon, mitochondrial OS=Mus musculus OX=10090 GN=Atp5f1e PE=1 SV=2	10.01	5.8	15.3846	31	1	1	0.875	0.133333	0.117188	-0.133333	-0.117188
P07901	Heat shock protein HSP 90-alpha OS=Mus musculus OX=10090 GN=Hsp90aa1 PE=1 SV=4	5.01	84.7	37.6535	1373	17	44.125	38.75	0.129713	222.727	-0.129713	-222.727
Q04447	Creatine kinase B-type OS=Mus musculus OX=10090 GN=Ckb PE=1 SV=1	5.67	42.7	66.6667	1338	19	44.625	39.25	0.128167	225.414	-0.128167	-225.414	4.88546	0.00718966	Ckb
Q8R0A5	Transcription elongation factor A protein-like 3 OS=Mus musculus OX=10090 GN=Tceal3 PE=1 SV=2	5.44	22.5	17	93	2	3.125	2.75	0.12766	1.10156	-0.12766	-1.10156
Q61990	Poly(rC)-binding protein 2 OS=Mus musculus OX=10090 GN=Pcbp2 PE=1 SV=1	6.79	38.2	16.0221	191	1	6.375	5.625	0.125	4.5	-0.125	-4.5
Q61171	Peroxiredoxin-2 OS=Mus musculus OX=10090 GN=Prdx2 PE=1 SV=3	5.41	21.8	52.5253	353	8	11.75	10.375	0.124294	15.2109	-0.124294	-15.2109
A0A0G2JGS4	Calcium/calmodulin-dependent protein kinase OS=Mus musculus OX=10090 GN=Camk2d PE=1 SV=1	7.27	60	9.56848	158	2	5.375	4.75	0.123457	3.16406	-0.123457	-3.16406
Q9ERK4	Exportin-2 OS=Mus musculus OX=10090 GN=Cse1l PE=1 SV=1	5.77	110.4	4.6344	352	2	10.875	9.625	0.121951	12.8125	-0.121951	-12.8125
P32958	Rod outer segment membrane protein 1 OS=Mus musculus OX=10090 GN=Rom1 PE=1 SV=1	5.55	37.2	16.5242	175	5	5.5	4.875	0.120482	3.24219	-0.120482	-3.24219
P08752	Guanine nucleotide-binding protein G(i) subunit alpha-2 OS=Mus musculus OX=10090 GN=Gnai2 PE=1 SV=5	5.45	40.5	15.493	214	2	6.75	6	0.117647	4.78125	-0.117647	-4.78125
Q8K0U4	Heat shock 70 kDa protein 12A OS=Mus musculus OX=10090 GN=Hspa12a PE=1 SV=1	6.77	74.8	1.62963	36	1	1.125	1	0.117647	0.132812	-0.117647	-0.132812
A0A6I8MX27	L-lactate dehydrogenase OS=Mus musculus OX=10090 GN=Ldhb PE=1 SV=1	6.25	37.3	32.2581	601	10	18.375	16.375	0.115108	34.75	-0.115108	-34.75
A0A1B0GSX0	L-lactate dehydrogenase OS=Mus musculus OX=10090 GN=Ldha PE=1 SV=1	8.35	39.7	63.4349	1273	18	41.5	37	0.11465	176.625	-0.11465	-176.625
Q61644	Protein kinase C and casein kinase substrate in neurons protein 1 OS=Mus musculus OX=10090 GN=Pacsin1 PE=1 SV=1	5.24	50.5	27.6644	119	7	3.5	3.125	0.113208	1.24219	-0.113208	-1.24219
P06745	Glucose-6-phosphate isomerase OS=Mus musculus OX=10090 GN=Gpi PE=1 SV=4	8.13	62.7	41.2186	819	17	26.875	24	0.113022	73.1328	-0.113022	-73.1328
P35564	Calnexin OS=Mus musculus OX=10090 GN=Canx PE=1 SV=1	4.64	67.2	16.2437	186	7	5.875	5.25	0.11236	3.47656	-0.11236	-3.47656
P05201	Aspartate aminotransferase, cytoplasmic OS=Mus musculus OX=10090 GN=Got1 PE=1 SV=3	7.14	46.2	55.6901	604	18	17.75	15.875	0.111524	31.5234	-0.111524	-31.5234
P56391	Cytochrome c oxidase subunit 6B1 OS=Mus musculus OX=10090 GN=Cox6b1 PE=1 SV=2	8.72	10.1	41.8605	213	3	7.125	6.375	0.111111	5.0625	-0.111111	-5.0625
Q8BG05	Heterogeneous nuclear ribonucleoprotein A3 OS=Mus musculus OX=10090 GN=Hnrnpa3 PE=1 SV=1	9.01	39.6	31.9261	295	11	8.375	7.5	0.110236	6.94531	-0.110236	-6.94531
E9QKR0	Guanine nucleotide-binding protein G(I)/G(S)/G(T) subunit beta-2 OS=Mus musculus OX=10090 GN=Gnb2 PE=1 SV=1	6.6	41.4	26.7016	612	2	19.5	17.5	0.108108	37	-0.108108	-37
P62806	Histone H4 OS=Mus musculus OX=10090 GN=H4c1 PE=1 SV=2	11.36	11.4	57.2816	2649	10	82.5	74.25	0.105263	646.594	-0.105263	-646.594	5.4497	0.00426741	H4c1
P61979	Heterogeneous nuclear ribonucleoprotein K OS=Mus musculus OX=10090 GN=Hnrnpk PE=1 SV=1	5.54	50.9	33.4773	299	9	10.25	9.25	0.102564	9.75	-0.102564	-9.75
P43275	Histone H1.1 OS=Mus musculus OX=10090 GN=H1-1 PE=1 SV=2	10.93	21.8	18.3099	300	2	9.125	8.25	0.100719	7.60156	-0.100719	-7.60156	3.86647	0.0192725	H1-1
E9PYN1	Cell adhesion molecule 1 OS=Mus musculus OX=10090 GN=Cadm1 PE=1 SV=1	4.87	51.7	20.2532	81	7	2.625	2.375	0.1	0.625	-0.1	-0.625
P68372	Tubulin beta-4B chain OS=Mus musculus OX=10090 GN=Tubb4b PE=1 SV=1	4.89	49.8	60.8989	2261	1	70.625	64	0.0984215	445.945	-0.0984215	-445.945
P09411	Phosphoglycerate kinase 1 OS=Mus musculus OX=10090 GN=Pgk1 PE=1 SV=4	7.9	44.5	64.2686	2264	21	71	64.375	0.0978763	448.43	-0.0978763	-448.43	3.38286	0.0314077	Pgk1
Q61011	Guanine nucleotide-binding protein G(I)/G(S)/G(T) subunit beta-3 OS=Mus musculus OX=10090 GN=Gnb3 PE=1 SV=2	5.69	37.2	11.7647	311	2	9.75	8.875	0.0939597	8.14844	-0.0939597	-8.14844
Q91VR2	ATP synthase subunit gamma, mitochondrial OS=Mus musculus OX=10090 GN=Atp5f1c PE=1 SV=1	9.01	32.9	18.7919	138	5	4.25	3.875	0.0923077	1.52344	-0.0923077	-1.52344
P17182	Alpha-enolase OS=Mus musculus OX=10090 GN=Eno1 PE=1 SV=3	6.8	47.1	74.6544	3444	20	101	92.125	0.0919094	856.992	-0.0919094	-856.992	5.02349	0.00631838	Eno1
P99024	Tubulin beta-5 chain OS=Mus musculus OX=10090 GN=Tubb5 PE=1 SV=1	4.89	49.6	67.1171	2196	3	68.875	62.875	0.0910816	395.25	-0.0910816	-395.25
Q9D051	Pyruvate dehydrogenase E1 component subunit beta, mitochondrial OS=Mus musculus OX=10090 GN=Pdhb PE=1 SV=1	6.87	38.9	8.91365	93	2	2.875	2.625	0.0909091	0.6875	-0.0909091	-0.6875
P62849	40S ribosomal protein S24 OS=Mus musculus OX=10090 GN=Rps24 PE=1 SV=1	10.78	15.4	11.2782	103	1	3	2.75	0.0869565	0.71875	-0.0869565	-0.71875
A0A286YDB6	Synaptoporin OS=Mus musculus OX=10090 GN=Synpr PE=1 SV=1	7.23	36.3	6.76923	48	2	1.5	1.375	0.0869565	0.179688	-0.0869565	-0.179688
D3Z722	40S ribosomal protein S19 OS=Mus musculus OX=10090 GN=Rps19 PE=1 SV=1	10.46	23.1	6.13208	44	1	1.5	1.375	0.0869565	0.179688	-0.0869565	-0.179688
P43277	Histone H1.3 OS=Mus musculus OX=10090 GN=H1-3 PE=1 SV=2	11.03	22.1	14.9321	946	1	29.375	27	0.0842572	66.9453	-0.0842572	-66.9453
Q7TMM9	Tubulin beta-2A chain OS=Mus musculus OX=10090 GN=Tubb2a PE=1 SV=1	4.89	49.9	59.7753	2077	5	64	59	0.0813008	307.5	-0.0813008	-307.5
Q9Z1L4	Retinoschisin OS=Mus musculus OX=10090 GN=Rs1 PE=1 SV=1	5.66	25.6	39.7321	267	7	8.125	7.5	0.08	4.88281	-0.08	-4.88281
O35143	ATPase inhibitor, mitochondrial OS=Mus musculus OX=10090 GN=Atp5if1 PE=1 SV=2	9.64	12.2	10.3774	49	1	1.625	1.5	0.08	0.195312	-0.08	-0.195312
P70296	Phosphatidylethanolamine-binding protein 1 OS=Mus musculus OX=10090 GN=Pebp1 PE=1 SV=3	5.4	20.8	56.6845	543	6	17	15.75	0.0763359	20.4688	-0.0763359	-20.4688
A2A816	Parkinson disease protein 7 homolog (Fragment) OS=Mus musculus OX=10090 GN=Park7 PE=1 SV=1	6.05	12.7	57.6	179	1	5.25	4.875	0.0740741	1.89844	-0.0740741	-1.89844
P52785	Retinal guanylyl cyclase 1 OS=Mus musculus OX=10090 GN=Gucy2e PE=1 SV=2	7.77	120.6	1.35379	50	1	1.75	1.625	0.0740741	0.210938	-0.0740741	-0.210938
P63017	Heat shock cognate 71 kDa protein OS=Mus musculus OX=10090 GN=Hspa8 PE=1 SV=1	5.52	70.8	40.4025	1904	19	59.125	55	0.0722892	235.383	-0.0722892	-235.383
Q9CQV8	14-3-3 protein beta/alpha OS=Mus musculus OX=10090 GN=Ywhab PE=1 SV=3	4.83	28.1	52.439	422	6	13.125	12.25	0.0689655	11.1016	-0.0689655	-11.1016
E9QNN1	DEAH box protein 9 OS=Mus musculus OX=10090 GN=Dhx9 PE=1 SV=1	6.83	149.6	4.33526	63	5	1.875	1.75	0.0689655	0.226562	-0.0689655	-0.226562
P70349	Adenosine 5'-monophosphoramidase HINT1 OS=Mus musculus OX=10090 GN=Hint1 PE=1 SV=3	6.87	13.8	38.8889	58	4	1.875	1.75	0.0689655	0.226562	-0.0689655	-0.226562
Q91VB8	Alpha globin 1 OS=Mus musculus OX=10090 GN=Hba-a1 PE=1 SV=1	8.22	15.1	83.8028	400	9	9.75	9.125	0.0662252	5.89844	-0.0662252	-5.89844	3.62305	0.0246025	Hba-a1
Q99L13	3-hydroxyisobutyrate dehydrogenase, mitochondrial OS=Mus musculus OX=10090 GN=Hibadh PE=1 SV=1	8.13	35.4	17.6119	127	4	4	3.75	0.0645161	0.96875	-0.0645161	-0.96875
P45591	Cofilin-2 OS=Mus musculus OX=10090 GN=Cfl2 PE=1 SV=1	7.88	18.7	18.6747	64	1	2	1.875	0.0645161	0.242188	-0.0645161	-0.242188
Q7TSJ2	Microtubule-associated protein 6 OS=Mus musculus OX=10090 GN=Map6 PE=1 SV=2	9.5	96.4	2.42826	63	2	2	1.875	0.0645161	0.242188	-0.0645161	-0.242188
P00405	Cytochrome c oxidase subunit 2 OS=Mus musculus OX=10090 GN=Mtco2 PE=1 SV=1	4.73	26	27.7533	191	5	6.25	5.875	0.0618557	2.27344	-0.0618557	-2.27344
P51859	Hepatoma-derived growth factor OS=Mus musculus OX=10090 GN=Hdgf PE=1 SV=2	4.83	26.3	22.7848	131	4	4.25	4	0.0606061	1.03125	-0.0606061	-1.03125
P14873	Microtubule-associated protein 1B OS=Mus musculus OX=10090 GN=Map1b PE=1 SV=2	4.83	270.1	3.28734	94	6	2.125	2	0.0606061	0.257812	-0.0606061	-0.257812
P17742	Peptidyl-prolyl cis-trans isomerase A OS=Mus musculus OX=10090 GN=Ppia PE=1 SV=2	7.9	18	53.0488	867	7	26.75	25.25	0.0576923	39	-0.0576923	-39
Q99LX0	Parkinson disease protein 7 homolog OS=Mus musculus OX=10090 GN=Park7 PE=1 SV=1	6.77	20	49.2063	226	3	6.75	6.375	0.0571429	2.46094	-0.0571429	-2.46094
A0A1L1STE6	Isocitrate dehydrogenase [NAD] subunit, mitochondrial OS=Mus musculus OX=10090 GN=Idh3a PE=1 SV=1	6.93	41.5	25.5208	141	8	4.5	4.25	0.0571429	1.09375	-0.0571429	-1.09375
P62259	14-3-3 protein epsilon OS=Mus musculus OX=10090 GN=Ywhae PE=1 SV=1	4.74	29.2	56.8627	670	11	20.625	19.5	0.0560748	22.5703	-0.0560748	-22.5703
A6ZI44	Fructose-bisphosphate aldolase OS=Mus musculus OX=10090 GN=Aldoa PE=1 SV=1	7.91	45.1	53.11	1436	18	41.625	39.375	0.0555556	91.125	-0.0555556	-91.125	4.07636	0.0156557	Aldoa
A0A5F8MPY2	60S acidic ribosomal protein P2 OS=Mus musculus OX=10090 GN=Rplp2-ps1 PE=3 SV=1	4.59	11.6	39.1304	71	2	2.375	2.25	0.0540541	0.289062	-0.0540541	-0.289062
P61089	Ubiquitin-conjugating enzyme E2 N OS=Mus musculus OX=10090 GN=Ube2n PE=1 SV=1	6.57	17.1	17.1053	78	2	2.375	2.25	0.0540541	0.289062	-0.0540541	-0.289062
P34057	Recoverin OS=Mus musculus OX=10090 GN=Rcvrn PE=1 SV=2	5.12	23.4	61.8812	490	12	15.25	14.5	0.0504202	11.1562	-0.0504202	-11.1562
P43276	Histone H1.5 OS=Mus musculus OX=10090 GN=H1-5 PE=1 SV=2	10.92	22.6	10.3139	248	2	8	7.625	0.048	2.92969	-0.048	-2.92969
Q20BD0	Heterogeneous nuclear ribonucleoprotein A/B OS=Mus musculus OX=10090 GN=Hnrnpab PE=1 SV=1	6.95	36.2	13.253	292	3	8	7.625	0.048	2.92969	-0.048	-2.92969
P56480	ATP synthase subunit beta, mitochondrial OS=Mus musculus OX=10090 GN=Atp5f1b PE=1 SV=2	5.34	56.3	51.9849	1166	19	35.875	34.25	0.0463458	56.9766	-0.0463458	-56.9766
P43274	Histone H1.4 OS=Mus musculus OX=10090 GN=H1-4 PE=1 SV=2	11.11	22	15.0685	877	1	26.375	25.25	0.0435835	29.0391	-0.0435835	-29.0391
P63158	High mobility group protein B1 OS=Mus musculus OX=10090 GN=Hmgb1 PE=1 SV=2	5.74	24.9	35.3488	586	8	17.75	17	0.0431655	13.0312	-0.0431655	-13.0312
Q99KI0	Aconitate hydratase, mitochondrial OS=Mus musculus OX=10090 GN=Aco2 PE=1 SV=1	7.93	85.4	36.5385	502	21	15.375	14.75	0.0414938	9.41406	-0.0414938	-9.41406
Q80UE5	Band 4.1-like protein 2 OS=Mus musculus OX=10090 GN=Epb41l2 PE=1 SV=1	5.33	101.8	29.3028	538	21	15.875	15.25	0.0401606	9.72656	-0.0401606	-9.72656
A0A338P6F6	High mobility group protein HMG-I/HMG-Y OS=Mus musculus OX=10090 GN=Hmga1 PE=1 SV=1	11.91	13	20.339	121	2	3.375	3.25	0.0377358	0.414062	-0.0377358	-0.414062
Q91ZZ3	Beta-synuclein OS=Mus musculus OX=10090 GN=Sncb PE=1 SV=1	4.37	14	29.3233	228	2	6.875	6.625	0.037037	1.6875	-0.037037	-1.6875
O08599	Syntaxin-binding protein 1 OS=Mus musculus OX=10090 GN=Stxbp1 PE=1 SV=2	6.96	67.5	46.2963	780	22	24.875	24	0.0358056	21.3828	-0.0358056	-21.3828
P17809	Solute carrier family 2, facilitated glucose transporter member 1 OS=Mus musculus OX=10090 GN=Slc2a1 PE=1 SV=4	8.87	53.9	6.70732	260	3	7.375	7.125	0.0344828	1.8125	-0.0344828	-1.8125
Q9D6F9	Tubulin beta-4A chain OS=Mus musculus OX=10090 GN=Tubb4a PE=1 SV=3	4.88	49.6	59.9099	2110	3	63.875	61.75	0.0338308	133.477	-0.0338308	-133.477
P68369	Tubulin alpha-1A chain OS=Mus musculus OX=10090 GN=Tuba1a PE=1 SV=1	5.06	50.1	44.5676	2319	4	69.25	67	0.0330275	153.281	-0.0330275	-153.281
P62897	Cytochrome c, somatic OS=Mus musculus OX=10090 GN=Cycs PE=1 SV=2	9.58	11.6	37.1429	129	3	3.875	3.75	0.0327869	0.476562	-0.0327869	-0.476562
P15105	Glutamine synthetase OS=Mus musculus OX=10090 GN=Glul PE=1 SV=6	7.08	42.1	53.0831	1274	15	41.5	40.25	0.030581	51.0938	-0.030581	-51.0938
Q9ERD7	Tubulin beta-3 chain OS=Mus musculus OX=10090 GN=Tubb3 PE=1 SV=1	4.93	50.4	30.6667	1362	1	41.875	40.625	0.030303	51.5625	-0.030303	-51.5625
O88569	Heterogeneous nuclear ribonucleoproteins A2/B1 OS=Mus musculus OX=10090 GN=Hnrnpa2b1 PE=1 SV=2	8.95	37.4	45.3258	575	13	17.125	16.625	0.0296296	8.4375	-0.0296296	-8.4375
Q61937	Nucleophosmin OS=Mus musculus OX=10090 GN=Npm1 PE=1 SV=1	4.77	32.5	19.5205	127	4	4.375	4.25	0.0289855	0.539062	-0.0289855	-0.539062
Q91XV3	Brain acid soluble protein 1 OS=Mus musculus OX=10090 GN=Basp1 PE=1 SV=3	4.51	22.1	72.1239	718	9	22.75	22.125	0.0278552	14.0234	-0.0278552	-14.0234
P56959	RNA-binding protein FUS OS=Mus musculus OX=10090 GN=Fus PE=1 SV=1	9.36	52.6	14.0927	192	5	5.625	5.5	0.0224719	0.695312	-0.0224719	-0.695312
O08553	Dihydropyrimidinase-related protein 2 OS=Mus musculus OX=10090 GN=Dpysl2 PE=1 SV=2	6.38	62.2	44.5804	946	14	30.25	29.625	0.0208768	18.7109	-0.0208768	-18.7109	3.6869	0.0230688	Dpysl2
P57722	Poly(rC)-binding protein 3 OS=Mus musculus OX=10090 GN=Pcbp3 PE=1 SV=3	7.52	39.3	22.372	216	2	6.875	6.75	0.0183486	0.851562	-0.0183486	-0.851562
P46460	Vesicle-fusing ATPase OS=Mus musculus OX=10090 GN=Nsf PE=1 SV=2	6.95	82.6	31.9892	717	21	22.5	22.125	0.0168067	8.36719	-0.0168067	-8.36719
A0A0G2JGX4	Sodium/potassium-transporting ATPase subunit alpha OS=Mus musculus OX=10090 GN=Atp1a3 PE=1 SV=1	5.41	112.9	45.614	2115	27	66.5	65.5	0.0151515	66	-0.0151515	-66	3.02193	0.0456086	Atp1a3
P00920	Carbonic anhydrase 2 OS=Mus musculus OX=10090 GN=Ca2 PE=1 SV=4	7.01	29	57.3077	604	10	18.625	18.375	0.0135135	4.625	-0.0135135	-4.625
Q5SXR6	Clathrin heavy chain OS=Mus musculus OX=10090 GN=Cltc PE=1 SV=1	5.69	191.9	29.7796	901	38	27.625	27.375	0.00909091	6.875	-0.00909091	-6.875
Q8VEM8	Phosphate carrier protein, mitochondrial OS=Mus musculus OX=10090 GN=Slc25a3 PE=1 SV=1	9.26	39.6	37.2549	697	11	21.625	21.5	0.0057971	2.69531	-0.0057971	-2.69531
P48962	ADP/ATP translocase 1 OS=Mus musculus OX=10090 GN=Slc25a4 PE=1 SV=4	9.72	32.9	47.3154	944	7	29.375	29.25	0.00426439	3.66406	-0.00426439	-3.66406
Q8CBB6	Histone H2B OS=Mus musculus OX=10090 GN=H2bc24 PE=2 SV=1	10.37	14.9	44.7761	1332	3	38.25	38.125	0.00327332	4.77344	-0.00327332	-4.77344	3.59437	0.0253261	H2bc24
Q64524	Histone H2B type 2-E OS=Mus musculus OX=10090 GN=H2bc21 PE=1 SV=3	10.32	14	42.0635	965	2	27.125	27.125	0	0	0	0	4.64704	0.00900877	H2bc21
E9QAS5	DNA helicase OS=Mus musculus OX=10090 GN=Chd4 PE=1 SV=1	5.86	218.5	0.936524	12	1	0.125	0.125	0	0	0	0	3.82295	0.0201275	Chd4
P24369	Peptidyl-prolyl cis-trans isomerase B OS=Mus musculus OX=10090 GN=Ppib PE=1 SV=2	9.55	23.7	9.72222	12	2	0.125	0.125	0	0	0	0	3.62909	0.0244528	Ppib
P60824	Cold-inducible RNA-binding protein OS=Mus musculus OX=10090 GN=Cirbp PE=1 SV=1	9.61	18.6	14.5349	71	2	2	2	0	0	0	0	3.13853	0.0403987	Cirbp
Q9D0M5	Dynein light chain 2, cytoplasmic OS=Mus musculus OX=10090 GN=Dynll2 PE=1 SV=1	7.37	10.3	49.4382	158	3	5.25	5.25	0	0	0	0
Q9QW08	Phosducin OS=Mus musculus OX=10090 GN=Pdc PE=2 SV=1	4.65	28	44.6721	294	9	9.5	9.5	0	0	0	0
A0A0A0MQB4	Rho GTPase-activating protein 40 (Fragment) OS=Mus musculus OX=10090 GN=Arhgap40 PE=4 SV=1	8.88	74.6	1.33333	3	1	0.125	0.125	0	0	0	0
A0A0R4J1P8	Tyrosine-protein kinase OS=Mus musculus OX=10090 GN=Matk PE=1 SV=1	8.51	51.6	6.23656	2	2	0.125	0.125	0	0	0	0
A0A1D5RLZ3	Dystonin (Fragment) OS=Mus musculus OX=10090 GN=Dst PE=1 SV=1	5.21	189.9	0.477897	3	1	0.125	0.125	0	0	0	0
A0A1D5RMD4	Kinesin-like protein KIF16B OS=Mus musculus OX=10090 GN=Kif16b PE=1 SV=1	5.85	157.1	4.11255	3	3	0.125	0.125	0	0	0	0
A0A1L1SQG7	Ryanodine receptor 1 OS=Mus musculus OX=10090 GN=Ryr1 PE=1 SV=1	5.27	567.7	1.4424	3	3	0.125	0.125	0	0	0	0
A0A1U6URG8	Nuclear factor of-activated T-cells 5 OS=Mus musculus OX=10090 GN=Nfat5 PE=1 SV=1	5.34	157.9	4.45816	2	2	0.125	0.125	0	0	0	0
A0A571BG68	FERM and PDZ domain-containing protein 4 OS=Mus musculus OX=10090 GN=Frmpd4 PE=1 SV=1	5.34	195.6	4.66817	3	3	0.125	0.125	0	0	0	0
A0A5F8MPY3	Non-specific protein-tyrosine kinase OS=Mus musculus OX=10090 GN=Ptk2 PE=1 SV=1	6.68	123.7	0.914913	3	1	0.125	0.125	0	0	0	0
A0A5H1ZRK8	Immunoglobulin kappa constant (Fragment) OS=Mus musculus OX=10090 GN=Igkc PE=1 SV=1	5.41	11.9	10.2804	7	1	0.125	0.125	0	0	0	0
A0S860	Zinc finger FYVE domain-containing protein 9 splice variant Z2.1 OS=Mus musculus OX=10090 GN=Zfyve9 PE=1 SV=1	6.4	77.5	0.991501	5	1	0.125	0.125	0	0	0	0
A2AGH6	Mediator of RNA polymerase II transcription subunit 12 OS=Mus musculus OX=10090 GN=Med12 PE=1 SV=1	7.17	244.4	0.730594	5	1	0.125	0.125	0	0	0	0
A2AGW5	PRAME-like 21 OS=Mus musculus OX=10090 GN=Pramel21 PE=3 SV=1	8.15	57.6	3.59281	2	1	0.125	0.125	0	0	0	0
B1AWS8	Receptor protein-tyrosine kinase OS=Mus musculus OX=10090 GN=Tek PE=1 SV=1	6.74	125.7	6.05521	2	2	0.125	0.125	0	0	0	0
D3YUJ1	E3 ubiquitin-protein ligase RNF181 OS=Mus musculus OX=10090 GN=Rnf181 PE=1 SV=1	7.37	23	3.8835	2	1	0.125	0.125	0	0	0	0
D3YVS8	Arf-GAP with Rho-GAP domain, ANK repeat and PH domain-containing protein 1 (Fragment) OS=Mus musculus OX=10090 GN=Arap1 PE=4 SV=1	3.81	1.2	100	2	1	0.125	0.125	0	0	0	0
D3Z5V4	Family with sequence similarity 124, member A OS=Mus musculus OX=10090 GN=Fam124a PE=1 SV=1	6.6	59.2	7.08955	2	2	0.125	0.125	0	0	0	0
D6RG55	Tumor necrosis factor receptor superfamily member 1B OS=Mus musculus OX=10090 GN=Tnfrsf1b PE=4 SV=1	5.62	6	40	4	1	0.125	0.125	0	0	0	0
E0CYH7	Filamin A-interacting protein 1-like OS=Mus musculus OX=10090 GN=Filip1l PE=1 SV=1	6.33	129.8	2.38727	2	1	0.125	0.125	0	0	0	0
E9PW83	Family with sequence similarity 184, member A OS=Mus musculus OX=10090 GN=Fam184a PE=1 SV=1	5.96	132.9	1.48731	4	1	0.125	0.125	0	0	0	0
E9PYD6	Beclin-1 OS=Mus musculus OX=10090 GN=Becn1 PE=1 SV=1	5.1	32.1	17.3285	2	2	0.125	0.125	0	0	0	0
E9Q072	Selection and upkeep of intraepithelial T-cells protein 5 OS=Mus musculus OX=10090 GN=Skint5 PE=1 SV=1	8.16	167.2	0.40678	3	1	0.125	0.125	0	0	0	0
E9Q8K5	Titin OS=Mus musculus OX=10090 GN=Ttn PE=1 SV=1	6.37	3713.7	0.224101	5	5	0.125	0.125	0	0	0	0
E9QK83	Small subunit processome component 20 homolog OS=Mus musculus OX=10090 GN=Utp20 PE=1 SV=1	8.09	317.7	2.18716	3	3	0.125	0.125	0	0	0	0
E9QQ55	Coiled-coil domain-containing protein 33 OS=Mus musculus OX=10090 GN=Ccdc33 PE=4 SV=1	6.07	110.2	1.11675	4	1	0.125	0.125	0	0	0	0
H3BKP8	RIKEN cDNA 9930021J03 gene OS=Mus musculus OX=10090 GN=9930021J03Rik PE=1 SV=1	9.04	218.8	0.888012	3	1	0.125	0.125	0	0	0	0
K7N6U5	Vomeronasal 2, receptor 78 OS=Mus musculus OX=10090 GN=Vmn2r78 PE=4 SV=1	7.9	98.3	5.9789	5	1	0.125	0.125	0	0	0	0
O08523	Alpha-tectorin OS=Mus musculus OX=10090 GN=Tecta PE=1 SV=2	5.35	239.3	1.90255	2	2	0.125	0.125	0	0	0	0
O09167	60S ribosomal protein L21 OS=Mus musculus OX=10090 GN=Rpl21 PE=1 SV=3	10.49	18.6	11.25	8	1	0.125	0.125	0	0	0	0
O35305	Tumor necrosis factor receptor superfamily member 11A OS=Mus musculus OX=10090 GN=Tnfrsf11a PE=1 SV=1	5.03	66.6	10.56	3	3	0.125	0.125	0	0	0	0
O70325	Phospholipid hydroperoxide glutathione peroxidase OS=Mus musculus OX=10090 GN=Gpx4 PE=1 SV=4	8.46	22.2	5.58376	4	1	0.125	0.125	0	0	0	0
P04769	Prolactin-7D1 OS=Mus musculus OX=10090 GN=Prl7d1 PE=2 SV=1	5	27.9	3.68852	2	1	0.125	0.125	0	0	0	0
P06837	Neuromodulin OS=Mus musculus OX=10090 GN=Gap43 PE=1 SV=1	4.73	23.6	14.0969	4	2	0.125	0.125	0	0	0	0
P09581	Macrophage colony-stimulating factor 1 receptor OS=Mus musculus OX=10090 GN=Csf1r PE=1 SV=3	6.21	109.1	4.09417	2	1	0.125	0.125	0	0	0	0
P17427	AP-2 complex subunit alpha-2 OS=Mus musculus OX=10090 GN=Ap2a2 PE=1 SV=2	6.93	104	3.51812	4	1	0.125	0.125	0	0	0	0
P41234	ATP-binding cassette sub-family A member 2 OS=Mus musculus OX=10090 GN=Abca2 PE=1 SV=4	6.76	270.3	2.83484	2	2	0.125	0.125	0	0	0	0
P45376	Aldo-keto reductase family 1 member B1 OS=Mus musculus OX=10090 GN=Akr1b1 PE=1 SV=3	7.18	35.7	17.4051	3	2	0.125	0.125	0	0	0	0
P50431	Serine hydroxymethyltransferase, cytosolic OS=Mus musculus OX=10090 GN=Shmt1 PE=1 SV=3	6.95	52.6	8.3682	2	2	0.125	0.125	0	0	0	0
P57759	Endoplasmic reticulum resident protein 29 OS=Mus musculus OX=10090 GN=Erp29 PE=1 SV=2	6.15	28.8	3.81679	3	1	0.125	0.125	0	0	0	0
P59222	Scavenger receptor class F member 2 OS=Mus musculus OX=10090 GN=Scarf2 PE=1 SV=1	8.22	87.8	8.16327	2	2	0.125	0.125	0	0	0	0
P59999	Actin-related protein 2/3 complex subunit 4 OS=Mus musculus OX=10090 GN=Arpc4 PE=1 SV=3	8.43	19.7	4.7619	2	1	0.125	0.125	0	0	0	0
P61971	Nuclear transport factor 2 OS=Mus musculus OX=10090 GN=Nutf2 PE=1 SV=1	5.38	14.5	11.0236	4	1	0.125	0.125	0	0	0	0
P62334	26S proteasome regulatory subunit 10B OS=Mus musculus OX=10090 GN=Psmc6 PE=1 SV=1	7.49	44.1	4.62725	2	1	0.125	0.125	0	0	0	0
P67984	60S ribosomal protein L22 OS=Mus musculus OX=10090 GN=Rpl22 PE=1 SV=2	9.19	14.8	10.1562	3	1	0.125	0.125	0	0	0	0
P84099	60S ribosomal protein L19 OS=Mus musculus OX=10090 GN=Rpl19 PE=1 SV=1	11.47	23.5	8.67347	4	1	0.125	0.125	0	0	0	0
Q07113	Cation-independent mannose-6-phosphate receptor OS=Mus musculus OX=10090 GN=Igf2r PE=1 SV=1	5.71	273.6	2.81917	2	2	0.125	0.125	0	0	0	0
Q2PZL6	Protocadherin Fat 4 OS=Mus musculus OX=10090 GN=Fat4 PE=1 SV=2	4.91	540	1.1845	2	2	0.125	0.125	0	0	0	0
Q3TMV7	Pyridine nucleotide-disulfide oxidoreductase domain-containing protein 1 OS=Mus musculus OX=10090 GN=Pyroxd1 PE=2 SV=1	5.33	55.6	8.23293	2	2	0.125	0.125	0	0	0	0
Q3TUF7	YEATS domain-containing protein 2 OS=Mus musculus OX=10090 GN=Yeats2 PE=1 SV=2	9.04	148.9	1.0661	3	2	0.125	0.125	0	0	0	0
Q3UJB0	Splicing factor 3b, subunit 2 OS=Mus musculus OX=10090 GN=Sf3b2 PE=1 SV=1	5.62	98.1	1.48064	3	1	0.125	0.125	0	0	0	0
Q3V2H3	Sorting nexin-12 OS=Mus musculus OX=10090 GN=Snx12 PE=1 SV=1	8.44	19.8	6.47059	2	1	0.125	0.125	0	0	0	0
Q5H8C4	Vacuolar protein sorting-associated protein 13A OS=Mus musculus OX=10090 GN=Vps13a PE=1 SV=1	6.19	359.2	1.98989	2	2	0.125	0.125	0	0	0	0
Q60769	Tumor necrosis factor alpha-induced protein 3 OS=Mus musculus OX=10090 GN=Tnfaip3 PE=1 SV=2	8.16	87.6	10.1935	3	3	0.125	0.125	0	0	0	0
Q61738	Integrin alpha-7 OS=Mus musculus OX=10090 GN=Itga7 PE=1 SV=3	5.71	129.2	4.41052	2	2	0.125	0.125	0	0	0	0
Q61810	Latent-transforming growth factor beta-binding protein 3 OS=Mus musculus OX=10090 GN=Ltbp3 PE=1 SV=4	6.18	134.3	7.34238	4	4	0.125	0.125	0	0	0	0
Q64701	Retinoblastoma-like protein 1 OS=Mus musculus OX=10090 GN=Rbl1 PE=1 SV=3	7.49	119.4	4.79774	2	2	0.125	0.125	0	0	0	0
Q69Z89	Ras-associating and dilute domain-containing protein OS=Mus musculus OX=10090 GN=Radil PE=1 SV=2	6.57	120.3	7.46133	5	3	0.125	0.125	0	0	0	0
Q6PDS3	NAD(+) hydrolase SARM1 OS=Mus musculus OX=10090 GN=Sarm1 PE=1 SV=1	6.27	79.6	1.79558	4	1	0.125	0.125	0	0	0	0
Q80TE0	RNA polymerase II-associated protein 1 OS=Mus musculus OX=10090 GN=Rpap1 PE=1 SV=2	6.65	155.2	3.19375	2	2	0.125	0.125	0	0	0	0
Q80W00	Serine/threonine-protein phosphatase 1 regulatory subunit 10 OS=Mus musculus OX=10090 GN=Ppp1r10 PE=1 SV=1	9.16	94.3	1.35135	2	1	0.125	0.125	0	0	0	0
Q8BGE5	Fanconi anemia group M protein homolog OS=Mus musculus OX=10090 GN=Fancm PE=1 SV=3	6.33	225.9	0.346363	2	1	0.125	0.125	0	0	0	0
Q8BGQ7	Alanine--tRNA ligase, cytoplasmic OS=Mus musculus OX=10090 GN=Aars1 PE=1 SV=1	5.67	106.8	1.23967	3	1	0.125	0.125	0	0	0	0
Q8BH74	Nuclear pore complex protein Nup107 OS=Mus musculus OX=10090 GN=Nup107 PE=1 SV=1	5.43	106.7	2.05184	2	2	0.125	0.125	0	0	0	0
Q8BUH8	Sentrin-specific protease 7 OS=Mus musculus OX=10090 GN=Senp7 PE=1 SV=1	6.52	116.3	1.06075	2	1	0.125	0.125	0	0	0	0
Q8CGS6	DNA polymerase theta OS=Mus musculus OX=10090 GN=Polq PE=1 SV=2	7.34	280.5	0.943396	2	2	0.125	0.125	0	0	0	0
Q8CGV2	Tryptophan 5-hydroxylase 2 OS=Mus musculus OX=10090 GN=Tph2 PE=1 SV=2	6.24	55.8	1.84426	2	1	0.125	0.125	0	0	0	0
Q8K2B3	Succinate dehydrogenase [ubiquinone] flavoprotein subunit, mitochondrial OS=Mus musculus OX=10090 GN=Sdha PE=1 SV=1	7.37	72.5	6.4759	2	2	0.125	0.125	0	0	0	0
Q8K2Q7	BRO1 domain-containing protein BROX OS=Mus musculus OX=10090 GN=Brox PE=1 SV=1	7.69	46.2	1.45985	4	1	0.125	0.125	0	0	0	0
Q8K368	Fanconi anemia group I protein homolog OS=Mus musculus OX=10090 GN=Fanci PE=1 SV=2	6.16	149.2	2.63158	4	2	0.125	0.125	0	0	0	0
Q8R5J9	PRA1 family protein 3 OS=Mus musculus OX=10090 GN=Arl6ip5 PE=1 SV=2	9.61	21.5	5.85106	6	1	0.125	0.125	0	0	0	0
Q9D1D6	Collagen triple helix repeat-containing protein 1 OS=Mus musculus OX=10090 GN=Cthrc1 PE=2 SV=2	7.5	26.4	20.4082	3	2	0.125	0.125	0	0	0	0
Q9D5Y1	Coiled-coil domain-containing protein 39 OS=Mus musculus OX=10090 GN=Ccdc39 PE=1 SV=1	6.6	110	1.28068	2	1	0.125	0.125	0	0	0	0
Q9D611	Osteoclast stimulatory transmembrane protein OS=Mus musculus OX=10090 GN=Ocstamp PE=1 SV=1	9.54	54.5	3.01205	2	1	0.125	0.125	0	0	0	0
Q9D871	Carcinoembryonic antigen-related cell adhesion molecule 18 OS=Mus musculus OX=10090 GN=Ceacam18 PE=2 SV=1	6.76	42.2	6.11702	2	2	0.125	0.125	0	0	0	0
Q9ERS2	NADH dehydrogenase [ubiquinone] 1 alpha subcomplex subunit 13 OS=Mus musculus OX=10090 GN=Ndufa13 PE=1 SV=3	9.48	16.8	16.6667	3	2	0.125	0.125	0	0	0	0
Q9JI90	E3 ubiquitin-protein ligase RNF14 OS=Mus musculus OX=10090 GN=Rnf14 PE=1 SV=2	4.7	54.9	9.48454	2	2	0.125	0.125	0	0	0	0
Q9JJV2	Profilin-2 OS=Mus musculus OX=10090 GN=Pfn2 PE=1 SV=3	6.99	15	8.57143	2	2	0.125	0.125	0	0	0	0
Q9JKF1	Ras GTPase-activating-like protein IQGAP1 OS=Mus musculus OX=10090 GN=Iqgap1 PE=1 SV=2	6.48	188.6	1.50875	2	1	0.125	0.125	0	0	0	0
Q9QY01	Serine/threonine-protein kinase ULK2 OS=Mus musculus OX=10090 GN=Ulk2 PE=1 SV=1	8.53	112.8	2.98939	2	1	0.125	0.125	0	0	0	0
Q9QY40	Plexin-B3 OS=Mus musculus OX=10090 GN=Plxnb3 PE=1 SV=2	5.95	208.2	1.68244	3	2	0.125	0.125	0	0	0	0
Q9R158	Disintegrin and metalloproteinase domain-containing protein 26A OS=Mus musculus OX=10090 GN=Adam26a PE=2 SV=2	6.19	78.7	8.17791	2	2	0.125	0.125	0	0	0	0
Q9WVT6	Carbonic anhydrase 14 OS=Mus musculus OX=10090 GN=Ca14 PE=1 SV=1	6.35	37.5	6.52819	2	2	0.125	0.125	0	0	0	0
Q9Z0H1	WD repeat-containing protein 46 OS=Mus musculus OX=10090 GN=Wdr46 PE=2 SV=1	9.77	69	3.21543	2	1	0.125	0.125	0	0	0	0
Q9Z321	DNA topoisomerase 3-beta-1 OS=Mus musculus OX=10090 GN=Top3b PE=1 SV=1	7.93	96.9	6.61253	2	2	0.125	0.125	0	0	0	0
Z4YLB0	Histo-blood group ABO system transferase OS=Mus musculus OX=10090 GN=Abo PE=3 SV=1	8.97	39	4.79042	2	1	0.125	0.125	0	0	0	0
Z4YMI1	Alpha-N-acetylgalactosaminide alpha-2,6-sialyltransferase 6 (Fragment) OS=Mus musculus OX=10090 GN=St6galnac6 PE=3 SV=1	9.8	12	19.4444	2	1	0.125	0.125	0	0	0	0
P50518	V-type proton ATPase subunit E 1 OS=Mus musculus OX=10090 GN=Atp6v1e1 PE=1 SV=2	8.43	26.1	17.6991	8	3	0.25	0.25	0	0	0	0
P62281	40S ribosomal protein S11 OS=Mus musculus OX=10090 GN=Rps11 PE=1 SV=3	10.3	18.4	5.06329	10	1	0.25	0.25	0	0	0	0
Q3V2K7	RIKEN cDNA 1700123L14 gene OS=Mus musculus OX=10090 GN=1700123L14Rik PE=1 SV=1	8.38	48.1	2.95455	5	1	0.25	0.25	0	0	0	0
Q64511	DNA topoisomerase 2-beta OS=Mus musculus OX=10090 GN=Top2b PE=1 SV=2	8.29	181.8	0.992556	6	1	0.25	0.25	0	0	0	0
Q8CAA7	Glucose 1,6-bisphosphate synthase OS=Mus musculus OX=10090 GN=Pgm2l1 PE=1 SV=1	6.49	70.2	2.41546	7	1	0.25	0.25	0	0	0	0
Q99L47	Hsc70-interacting protein OS=Mus musculus OX=10090 GN=St13 PE=1 SV=1	5.26	41.6	2.69542	6	1	0.25	0.25	0	0	0	0
A0A0R4J0S7	Uveal autoantigen with coiled-coil domains and ankyrin repeats OS=Mus musculus OX=10090 GN=Uaca PE=1 SV=1	7.2	160.8	2.33546	9	2	0.375	0.375	0	0	0	0
A0A140LJ56	Transmembrane protein 147 OS=Mus musculus OX=10090 GN=Tmem147 PE=1 SV=1	7.77	26	6.49351	13	1	0.375	0.375	0	0	0	0
F6ZDS4	Nucleoprotein TPR OS=Mus musculus OX=10090 GN=Tpr PE=1 SV=1	5.03	273.8	0.287947	8	1	0.375	0.375	0	0	0	0
P26443	Glutamate dehydrogenase 1, mitochondrial OS=Mus musculus OX=10090 GN=Glud1 PE=1 SV=1	8	61.3	6.2724	6	3	0.375	0.375	0	0	0	0
P51150	Ras-related protein Rab-7a OS=Mus musculus OX=10090 GN=Rab7a PE=1 SV=2	6.7	23.5	11.1111	10	2	0.375	0.375	0	0	0	0
Q7TSG3	F-box only protein 5 OS=Mus musculus OX=10090 GN=Fbxo5 PE=1 SV=1	8.98	47.5	2.61283	10	1	0.375	0.375	0	0	0	0
Q99ML9	E3 ubiquitin-protein ligase Arkadia OS=Mus musculus OX=10090 GN=Rnf111 PE=1 SV=1	7.11	107.8	1.71891	12	1	0.375	0.375	0	0	0	0
A0A668KLC6	Microtubule-associated protein OS=Mus musculus OX=10090 GN=Map2 PE=1 SV=1	4.84	216	1.20664	14	2	0.5	0.5	0	0	0	0
E9Q7K1	Guanylate kinase OS=Mus musculus OX=10090 GN=Guk1 PE=1 SV=1	6.4	22.8	16.4251	12	3	0.5	0.5	0	0	0	0
Q8C0D5	Elongation factor-like GTPase 1 OS=Mus musculus OX=10090 GN=Efl1 PE=1 SV=1	6.16	125.7	0.709849	16	1	0.5	0.5	0	0	0	0
Q91X72	Hemopexin OS=Mus musculus OX=10090 GN=Hpx PE=1 SV=2	7.8	51.3	3.69565	16	2	0.5	0.5	0	0	0	0
P48722	Heat shock 70 kDa protein 4L OS=Mus musculus OX=10090 GN=Hspa4l PE=1 SV=2	5.74	94.3	3.46062	22	1	0.625	0.625	0	0	0	0
Q8VHM5	Heterogeneous nuclear ribonucleoprotein R OS=Mus musculus OX=10090 GN=Hnrnpr PE=1 SV=1	8.13	70.8	3.32278	18	1	0.625	0.625	0	0	0	0
Q9D0M3	Cytochrome c1, heme protein, mitochondrial OS=Mus musculus OX=10090 GN=Cyc1 PE=1 SV=1	9.16	35.3	14.1538	18	5	0.625	0.625	0	0	0	0
Q9QXZ0	Microtubule-actin cross-linking factor 1 OS=Mus musculus OX=10090 GN=Macf1 PE=1 SV=2	5.43	831.4	0.666304	18	2	0.625	0.625	0	0	0	0
Q923S9	Ras-related protein Rab-30 OS=Mus musculus OX=10090 GN=Rab30 PE=1 SV=1	4.97	23	18.7192	20	1	0.75	0.75	0	0	0	0
A0A3B2WCL5	Ran-binding protein 3 OS=Mus musculus OX=10090 GN=Ranbp3 PE=1 SV=1	4.94	59.3	3.40502	37	1	0.875	0.875	0	0	0	0
A2BI93	Synovial sarcoma, X member B9 OS=Mus musculus OX=10090 GN=Ssxb9 PE=3 SV=1	4.83	21.6	9.72973	33	1	1	1	0	0	0	0
B1AQD9	Protein unc-119 homolog A OS=Mus musculus OX=10090 GN=Unc119 PE=1 SV=1	6.16	29.2	3.43511	32	1	1	1	0	0	0	0
Q8BVE3	V-type proton ATPase subunit H OS=Mus musculus OX=10090 GN=Atp6v1h PE=1 SV=1	6.61	55.8	5.38302	39	2	1	1	0	0	0	0
Q9D517	1-acyl-sn-glycerol-3-phosphate acyltransferase gamma OS=Mus musculus OX=10090 GN=Agpat3 PE=1 SV=2	8.51	43.3	10.6383	41	2	1	1	0	0	0	0
Q9ERG0	LIM domain and actin-binding protein 1 OS=Mus musculus OX=10090 GN=Lima1 PE=1 SV=3	6.6	84	2.25764	32	1	1	1	0	0	0	0
Q9JIS5	Synaptic vesicle glycoprotein 2A OS=Mus musculus OX=10090 GN=Sv2a PE=1 SV=1	5.57	82.6	5.52561	47	4	1.5	1.5	0	0	0	0
P09174	Retinal rod rhodopsin-sensitive cGMP 3',5'-cyclic phosphodiesterase subunit gamma OS=Mus musculus OX=10090 GN=Pde6g PE=3 SV=1	9.48	9.6	10.3448	62	1	1.875	1.875	0	0	0	0
Q8CCK0	Core histone macro-H2A.2 OS=Mus musculus OX=10090 GN=Macroh2a2 PE=1 SV=3	9.69	40.1	6.45161	56	1	1.875	1.875	0	0	0	0
P47955	60S acidic ribosomal protein P1 OS=Mus musculus OX=10090 GN=Rplp1 PE=1 SV=1	4.32	11.5	14.0351	88	1	2.5	2.5	0	0	0	0
Q9R1P4	Proteasome subunit alpha type-1 OS=Mus musculus OX=10090 GN=Psma1 PE=1 SV=1	6.46	29.5	10.6464	91	2	2.75	2.75	0	0	0	0
F8WGL3	Cofilin, non-muscle isoform OS=Mus musculus OX=10090 GN=Cfl1 PE=1 SV=1	8.03	24.6	22.467	101	3	3.75	3.75	0	0	0	0
Q9DB20	ATP synthase subunit O, mitochondrial OS=Mus musculus OX=10090 GN=Atp5po PE=1 SV=1	9.99	23.3	27.23	125	5	3.875	3.875	0	0	0	0
P14094	Sodium/potassium-transporting ATPase subunit beta-1 OS=Mus musculus OX=10090 GN=Atp1b1 PE=1 SV=1	8.65	35.2	27.3026	152	7	4.5	4.5	0	0	0	0
P34884	Macrophage migration inhibitory factor OS=Mus musculus OX=10090 GN=Mif PE=1 SV=2	7.34	12.5	13.913	152	3	4.75	4.75	0	0	0	0
Q61598	Rab GDP dissociation inhibitor beta OS=Mus musculus OX=10090 GN=Gdi2 PE=1 SV=1	6.25	50.5	18.427	354	3	9.75	9.75	0	0	0	0
P15409	Rhodopsin OS=Mus musculus OX=10090 GN=Rho PE=1 SV=2	6.65	39	25.5747	662	4	20	20	0	0	0	0
P46096	Synaptotagmin-1 OS=Mus musculus OX=10090 GN=Syt1 PE=1 SV=1	8.53	47.4	32.7791	529	11	15.625	15.75	-0.00796813	-1.96094	0.00796813	1.96094
P63011	Ras-related protein Rab-3A OS=Mus musculus OX=10090 GN=Rab3a PE=1 SV=1	5.03	25	36.8182	471	5	14.25	14.375	-0.00873362	-1.78906	0.00873362	1.78906
P51881	ADP/ATP translocase 2 OS=Mus musculus OX=10090 GN=Slc25a5 PE=1 SV=3	9.73	32.9	43.2886	790	6	24	24.25	-0.0103627	-6.03125	0.0103627	6.03125
P20152	Vimentin OS=Mus musculus OX=10090 GN=Vim PE=1 SV=3	5.12	53.7	51.073	1144	22	34	34.375	-0.0109689	-12.8203	0.0109689	12.8203
A0A0A0MQA5	Tubulin alpha chain (Fragment) OS=Mus musculus OX=10090 GN=Tuba4a PE=1 SV=1	5.19	52.9	38.9937	1738	3	51.25	51.875	-0.0121212	-32.2266	0.0121212	32.2266
A0A1B0GR11	Transaldolase OS=Mus musculus OX=10090 GN=Taldo1 PE=1 SV=1	7.02	42.1	16.2304	586	7	17	17.25	-0.0145985	-4.28125	0.0145985	4.28125
P18872	Guanine nucleotide-binding protein G(o) subunit alpha OS=Mus musculus OX=10090 GN=Gnao1 PE=1 SV=3	5.53	40.1	36.7232	534	9	16.25	16.5	-0.0152672	-4.09375	0.0152672	4.09375
Q8VEK3	Heterogeneous nuclear ribonucleoprotein U OS=Mus musculus OX=10090 GN=Hnrnpu PE=1 SV=1	6.24	87.9	19.625	506	13	15.75	16	-0.015748	-3.96875	0.015748	3.96875
P26645	Myristoylated alanine-rich C-kinase substrate OS=Mus musculus OX=10090 GN=Marcks PE=1 SV=2	4.34	29.6	36.246	425	6	12.375	12.625	-0.02	-3.125	0.02	3.125	3.63927	0.0242028	Marcks
Q8C2Q7	Heterogeneous nuclear ribonucleoprotein H OS=Mus musculus OX=10090 GN=Hnrnph1 PE=1 SV=1	6.8	51.2	20.7627	184	2	5.5	5.625	-0.0224719	-0.695312	0.0224719	0.695312
P60710	Actin, cytoplasmic 1 OS=Mus musculus OX=10090 GN=Actb PE=1 SV=1	5.48	41.7	63.7333	1191	7	34.875	35.75	-0.0247788	-30.8984	0.0247788	30.8984
B0QZN5	Synaptobrevin-2 OS=Mus musculus OX=10090 GN=Vamp2 PE=1 SV=1	9.38	17.9	24.5399	172	4	4.875	5	-0.0253165	-0.617188	0.0253165	0.617188
D3Z134	Protein MGARP OS=Mus musculus OX=10090 GN=Mgarp PE=1 SV=2	4.17	31.2	10.101	158	3	4.75	4.875	-0.025974	-0.601562	0.025974	0.601562
P68254	14-3-3 protein theta OS=Mus musculus OX=10090 GN=Ywhaq PE=1 SV=1	4.78	27.8	50.6122	327	8	9.5	9.75	-0.025974	-2.40625	0.025974	2.40625
Q6P1J1	Crmp1 protein OS=Mus musculus OX=10090 GN=Crmp1 PE=1 SV=1	6.81	74.2	21.8659	279	5	8.625	8.875	-0.0285714	-2.1875	0.0285714	2.1875
P05202	Aspartate aminotransferase, mitochondrial OS=Mus musculus OX=10090 GN=Got2 PE=1 SV=1	9	47.4	43.2558	666	15	20.625	21.25	-0.0298507	-13.0859	0.0298507	13.0859
P0DP27	Calmodulin-2 OS=Mus musculus OX=10090 GN=Calm2 PE=1 SV=1	4.22	16.8	52.349	394	8	11.625	12	-0.031746	-4.42969	0.031746	4.42969
P32067	Lupus La protein homolog OS=Mus musculus OX=10090 GN=Ssb PE=1 SV=1	9.77	47.7	6.50602	151	2	3.75	3.875	-0.0327869	-0.476562	0.0327869	0.476562
P50396	Rab GDP dissociation inhibitor alpha OS=Mus musculus OX=10090 GN=Gdi1 PE=1 SV=3	5.08	50.5	46.7562	543	12	15	15.5	-0.0327869	-7.625	0.0327869	7.625
P0C0S6	Histone H2A.Z OS=Mus musculus OX=10090 GN=H2az1 PE=1 SV=2	10.58	13.5	31.25	578	2	16.875	17.5	-0.0363636	-10.7422	0.0363636	10.7422
P14152	Malate dehydrogenase, cytoplasmic OS=Mus musculus OX=10090 GN=Mdh1 PE=1 SV=3	6.58	36.5	28.4431	616	8	18.625	19.375	-0.0394737	-14.25	0.0394737	14.25
P08228	Superoxide dismutase [Cu-Zn] OS=Mus musculus OX=10090 GN=Sod1 PE=1 SV=2	6.51	15.9	32.4675	306	4	8.625	9	-0.0425532	-3.30469	0.0425532	3.30469
P68033	Actin, alpha cardiac muscle 1 OS=Mus musculus OX=10090 GN=Actc1 PE=1 SV=1	5.39	42	33.4218	1026	2	30.125	31.5	-0.0446247	-42.3672	0.0446247	42.3672
E9QNP0	Ubiquitin A-52 residue ribosomal protein fusion product 1 OS=Mus musculus OX=10090 GN=Kxd1 PE=1 SV=1	9.83	26.8	18.5345	433	4	13.125	13.75	-0.0465116	-8.39844	0.0465116	8.39844
P62715	Serine/threonine-protein phosphatase 2A catalytic subunit beta isoform OS=Mus musculus OX=10090 GN=Ppp2cb PE=1 SV=1	5.43	35.6	12.945	103	3	2.5	2.625	-0.0487805	-0.320312	0.0487805	0.320312	4.11329	0.0150973	Ppp2cb
Q9WV02	RNA-binding motif protein, X chromosome OS=Mus musculus OX=10090 GN=Rbmx PE=1 SV=1	10.05	42.3	10.4859	79	3	2.25	2.375	-0.0540541	-0.289062	0.0540541	0.289062
O35633	Vesicular inhibitory amino acid transporter OS=Mus musculus OX=10090 GN=Slc32a1 PE=1 SV=3	6.64	57.3	5.33333	141	2	4.5	4.75	-0.0540541	-1.15625	0.0540541	1.15625
Q08331	Calretinin OS=Mus musculus OX=10090 GN=Calb2 PE=1 SV=3	5.02	31.4	43.5424	285	11	8.875	9.375	-0.0547945	-4.5625	0.0547945	4.5625
P35700	Peroxiredoxin-1 OS=Mus musculus OX=10090 GN=Prdx1 PE=1 SV=1	8.12	22.2	50.2513	337	11	8.75	9.25	-0.0555556	-4.5	0.0555556	4.5	3.23676	0.0364954	Prdx1
P14211	Calreticulin OS=Mus musculus OX=10090 GN=Calr PE=1 SV=1	4.49	48	33.6538	209	7	6.25	6.625	-0.0582524	-2.41406	0.0582524	2.41406
Q62167	ATP-dependent RNA helicase DDX3X OS=Mus musculus OX=10090 GN=Ddx3x PE=1 SV=3	7.18	73.1	3.02115	65	1	2	2.125	-0.0606061	-0.257812	0.0606061	0.257812
A0A0R4J0H3	Retinol-binding protein 3 OS=Mus musculus OX=10090 GN=Rbp3 PE=1 SV=1	5.11	134.4	7.37439	65	6	1.875	2	-0.0645161	-0.242188	0.0645161	0.242188
Q5SVJ0	Calcium/calmodulin-dependent protein kinase OS=Mus musculus OX=10090 GN=Camk2b PE=1 SV=1	7.27	72.9	5.55556	124	1	3.75	4	-0.0645161	-0.96875	0.0645161	0.96875
Q60932	Voltage-dependent anion-selective channel protein 1 OS=Mus musculus OX=10090 GN=Vdac1 PE=1 SV=3	8.43	32.3	33.7838	540	7	16.125	17.25	-0.0674157	-18.7734	0.0674157	18.7734
P14733	Lamin-B1 OS=Mus musculus OX=10090 GN=Lmnb1 PE=1 SV=3	5.16	66.7	36.5646	783	19	23.125	24.75	-0.0678851	-38.8984	0.0678851	38.8984
H3BKH6	S-formylglutathione hydrolase OS=Mus musculus OX=10090 GN=Esd PE=1 SV=1	7.83	32.8	6.10169	61	1	1.75	1.875	-0.0689655	-0.226562	0.0689655	0.226562
P84084	ADP-ribosylation factor 5 OS=Mus musculus OX=10090 GN=Arf5 PE=1 SV=2	6.79	20.5	11.6667	55	1	1.75	1.875	-0.0689655	-0.226562	0.0689655	0.226562
P60335	Poly(rC)-binding protein 1 OS=Mus musculus OX=10090 GN=Pcbp1 PE=1 SV=1	7.09	37.5	24.7191	172	4	5.25	5.625	-0.0689655	-2.03906	0.0689655	2.03906
P09671	Superoxide dismutase [Mn], mitochondrial OS=Mus musculus OX=10090 GN=Sod2 PE=1 SV=3	8.62	24.6	22.973	212	4	6.625	7.125	-0.0727273	-3.4375	0.0727273	3.4375
P20029	Endoplasmic reticulum chaperone BiP OS=Mus musculus OX=10090 GN=Hspa5 PE=1 SV=3	5.16	72.4	15.8779	244	6	6.625	7.125	-0.0727273	-3.4375	0.0727273	3.4375
A0A0A6YY91	Neural cell adhesion molecule 1 (Fragment) OS=Mus musculus OX=10090 GN=Ncam1 PE=1 SV=1	4.83	116.3	20.8448	670	5	19.75	21.25	-0.0731707	-30.75	0.0731707	30.75
P19783	Cytochrome c oxidase subunit 4 isoform 1, mitochondrial OS=Mus musculus OX=10090 GN=Cox4i1 PE=1 SV=2	9.23	19.5	47.929	50	6	1.625	1.75	-0.0740741	-0.210938	0.0740741	0.210938
Q9QYG0	Protein NDRG2 OS=Mus musculus OX=10090 GN=Ndrg2 PE=1 SV=1	5.4	40.8	15.0943	46	4	1.625	1.75	-0.0740741	-0.210938	0.0740741	0.210938
Q8BFZ3	Beta-actin-like protein 2 OS=Mus musculus OX=10090 GN=Actbl2 PE=1 SV=1	5.49	42	26.0638	324	1	9.25	10	-0.0779221	-7.21875	0.0779221	7.21875
D3YWJ3	40S ribosomal protein S2 OS=Mus musculus OX=10090 GN=Rps2 PE=1 SV=1	9.92	32.1	3.64238	49	1	1.5	1.625	-0.08	-0.195312	0.08	0.195312
A8DUK4	Beta-globin OS=Mus musculus OX=10090 GN=Hbb-bs PE=1 SV=1	7.69	15.7	77.551	1141	6	29.5	32	-0.0813008	-76.875	0.0813008	76.875	3.47193	0.0286777	Hbb-bs
P40142	Transketolase OS=Mus musculus OX=10090 GN=Tkt PE=1 SV=1	7.5	67.6	34.992	708	17	20.125	21.875	-0.0833333	-36.75	0.0833333	36.75
Q3V117	ATP-citrate synthase OS=Mus musculus OX=10090 GN=Acly PE=1 SV=1	7.44	120.7	7.44777	190	6	5.25	5.75	-0.0909091	-2.75	0.0909091	2.75
P17710	Hexokinase-1 OS=Mus musculus OX=10090 GN=Hk1 PE=1 SV=3	6.8	108.2	18.3778	233	17	6.5	7.125	-0.0917431	-4.25781	0.0917431	4.25781
E9QLK9	Clathrin coat assembly protein AP180 OS=Mus musculus OX=10090 GN=Snap91 PE=1 SV=2	4.91	91.8	7.10322	82	6	2.5	2.75	-0.0952381	-0.65625	0.0952381	0.65625
P48036	Annexin A5 OS=Mus musculus OX=10090 GN=Anxa5 PE=1 SV=1	4.96	35.7	23.1975	186	7	5	5.5	-0.0952381	-2.625	0.0952381	2.625
P19157	Glutathione S-transferase P 1 OS=Mus musculus OX=10090 GN=Gstp1 PE=1 SV=2	7.87	23.6	32.8571	206	5	6.25	6.875	-0.0952381	-4.10156	0.0952381	4.10156
P63038	60 kDa heat shock protein, mitochondrial OS=Mus musculus OX=10090 GN=Hspd1 PE=1 SV=1	6.18	60.9	25.829	100	11	3.625	4	-0.0983607	-1.42969	0.0983607	1.42969
Q9CQB4	Cytochrome b-c1 complex subunit 7 OS=Mus musculus OX=10090 GN=Uqcrb PE=1 SV=1	9.11	13.6	26.1261	119	3	3.5	3.875	-0.101695	-1.38281	0.101695	1.38281
E9QB01	Neural cell adhesion molecule 1 OS=Mus musculus OX=10090 GN=Ncam1 PE=1 SV=2	4.93	93.6	21.7903	596	2	17.125	19	-0.103806	-33.8672	0.103806	33.8672
Q9CR57	60S ribosomal protein L14 OS=Mus musculus OX=10090 GN=Rpl14 PE=1 SV=3	11.02	23.5	4.60829	24	1	1.125	1.25	-0.105263	-0.148438	0.105263	0.148438
Q5EBP8	Helix-destabilizing protein OS=Mus musculus OX=10090 GN=Hnrnpa1 PE=1 SV=1	9.13	38.8	26.0054	159	7	4.125	4.625	-0.114286	-2.1875	0.114286	2.1875
P70333	Heterogeneous nuclear ribonucleoprotein H2 OS=Mus musculus OX=10090 GN=Hnrnph2 PE=1 SV=1	6.3	49.2	20.49	114	2	3	3.375	-0.117647	-1.19531	0.117647	1.19531
Q9Z1G4	V-type proton ATPase 116 kDa subunit a 1 OS=Mus musculus OX=10090 GN=Atp6v0a1 PE=1 SV=3	6.76	96.4	12.0381	101	7	3	3.375	-0.117647	-1.19531	0.117647	1.19531
P99029	Peroxiredoxin-5, mitochondrial OS=Mus musculus OX=10090 GN=Prdx5 PE=1 SV=2	8.85	21.9	52.8571	142	7	3.75	4.25	-0.125	-2	0.125	2
Q60864	Stress-induced-phosphoprotein 1 OS=Mus musculus OX=10090 GN=Stip1 PE=1 SV=1	6.8	62.5	2.39411	94	1	2.75	3.125	-0.12766	-1.10156	0.12766	1.10156
P26350	Prothymosin alpha OS=Mus musculus OX=10090 GN=Ptma PE=1 SV=2	3.79	12.2	22.5225	295	5	8.125	9.25	-0.129496	-9.77344	0.129496	9.77344
P30275	Creatine kinase U-type, mitochondrial OS=Mus musculus OX=10090 GN=Ckmt1 PE=1 SV=1	8.16	47	8.37321	29	3	0.875	1	-0.133333	-0.117188	0.133333	0.117188
Q3TEA8	Heterochromatin protein 1-binding protein 3 OS=Mus musculus OX=10090 GN=Hp1bp3 PE=1 SV=1	9.7	60.8	11.5523	76	5	1.75	2	-0.133333	-0.46875	0.133333	0.46875
P24527	Leukotriene A-4 hydrolase OS=Mus musculus OX=10090 GN=Lta4h PE=1 SV=4	6.42	69	3.60065	92	2	2.5	2.875	-0.139535	-1.00781	0.139535	1.00781
Q91WS0	CDGSH iron-sulfur domain-containing protein 1 OS=Mus musculus OX=10090 GN=Cisd1 PE=1 SV=1	9.06	12.1	30.5556	101	3	2.5	2.875	-0.139535	-1.00781	0.139535	1.00781
P17183	Gamma-enolase OS=Mus musculus OX=10090 GN=Eno2 PE=1 SV=2	5.11	47.3	40.0922	1105	7	24.875	28.625	-0.140187	-100.312	0.140187	100.312	11.17	4.82953e-05	Eno2
P35802	Neuronal membrane glycoprotein M6-a OS=Mus musculus OX=10090 GN=Gpm6a PE=1 SV=1	5.27	31.1	16.9065	121	5	3.25	3.75	-0.142857	-1.75	0.142857	1.75
Q8BYK4	Retinol dehydrogenase 12 OS=Mus musculus OX=10090 GN=Rdh12 PE=2 SV=1	9.61	35.3	14.2405	107	3	2.375	2.75	-0.146341	-0.960938	0.146341	0.960938
Q9D881	Cytochrome c oxidase polypeptide Vb OS=Mus musculus OX=10090 GN=Cox5b-ps PE=1 SV=1	8.12	13.8	24.031	75	3	2.25	2.625	-0.153846	-0.914062	0.153846	0.914062
G3UZA7	Small ubiquitin-related modifier OS=Mus musculus OX=10090 GN=Sumo3 PE=1 SV=1	5.96	12.7	10.6195	112	1	3	3.5	-0.153846	-1.625	0.153846	1.625
Q91V14	Solute carrier family 12 member 5 OS=Mus musculus OX=10090 GN=Slc12a5 PE=1 SV=2	6.74	126.2	8.69947	237	9	5.625	6.625	-0.163265	-6.125	0.163265	6.125	2.99265	0.0470244	Slc12a5
P02089	Hemoglobin subunit beta-2 OS=Mus musculus OX=10090 GN=Hbb-b2 PE=1 SV=2	8.05	15.9	38.7755	505	1	13.125	15.5	-0.165939	-33.9922	0.165939	33.9922	4.15442	0.0145003	Hbb-b2
A2ALV3	Endophilin-A1 OS=Mus musculus OX=10090 GN=Sh3gl2 PE=1 SV=1	5.69	48.3	12.297	54	4	1.375	1.625	-0.166667	-0.375	0.166667	0.375
P11499	Heat shock protein HSP 90-beta OS=Mus musculus OX=10090 GN=Hsp90ab1 PE=1 SV=3	5.03	83.2	26.6575	545	7	15.375	18.25	-0.171004	-48.3359	0.171004	48.3359	3.3249	0.0333304	Hsp90ab1
P50516	V-type proton ATPase catalytic subunit A OS=Mus musculus OX=10090 GN=Atp6v1a PE=1 SV=2	5.58	68.3	35.8185	415	16	11.125	13.25	-0.174359	-25.8984	0.174359	25.8984
P27601	Guanine nucleotide-binding protein subunit alpha-13 OS=Mus musculus OX=10090 GN=Gna13 PE=1 SV=1	8.21	44	4.77454	122	1	3.25	3.875	-0.175439	-2.22656	0.175439	2.22656
O08539	Myc box-dependent-interacting protein 1 OS=Mus musculus OX=10090 GN=Bin1 PE=1 SV=1	5.03	64.4	1.70068	23	1	0.625	0.75	-0.181818	-0.0859375	0.181818	0.0859375
Q9DB77	Cytochrome b-c1 complex subunit 2, mitochondrial OS=Mus musculus OX=10090 GN=Uqcrc2 PE=1 SV=1	9.25	48.2	20.7506	173	7	5.5	6.625	-0.185567	-6.82031	0.185567	6.82031
Q60668	Heterogeneous nuclear ribonucleoprotein D0 OS=Mus musculus OX=10090 GN=Hnrnpd PE=1 SV=2	7.81	38.3	22.2535	370	5	9.875	12	-0.194286	-23.2422	0.194286	23.2422
P62320	Small nuclear ribonucleoprotein Sm D3 OS=Mus musculus OX=10090 GN=Snrpd3 PE=1 SV=1	10.32	13.9	7.14286	35	1	1.125	1.375	-0.2	-0.3125	0.2	0.3125
Q62277	Synaptophysin OS=Mus musculus OX=10090 GN=Syp PE=1 SV=2	4.94	34	10.5096	151	3	4.375	5.375	-0.205128	-4.875	0.205128	4.875
P43006	Excitatory amino acid transporter 2 OS=Mus musculus OX=10090 GN=Slc1a2 PE=1 SV=1	6.68	62	5.94406	86	3	2.125	2.625	-0.210526	-1.1875	0.210526	1.1875	3.64173	0.024143	Slc1a2
A0A0R4J0Q5	Lamin-B2 OS=Mus musculus OX=10090 GN=Lmnb2 PE=1 SV=1	5.55	69	7.47967	73	2	2.125	2.625	-0.210526	-1.1875	0.210526	1.1875
Q9CZ13	Cytochrome b-c1 complex subunit 1, mitochondrial OS=Mus musculus OX=10090 GN=Uqcrc1 PE=1 SV=2	6.21	52.8	7.91667	74	3	2.125	2.625	-0.210526	-1.1875	0.210526	1.1875
O54983	Ketimine reductase mu-crystallin OS=Mus musculus OX=10090 GN=Crym PE=1 SV=1	5.67	33.5	24.9201	133	6	3.125	3.875	-0.214286	-2.625	0.214286	2.625
Q61474	RNA-binding protein Musashi homolog 1 OS=Mus musculus OX=10090 GN=Msi1 PE=1 SV=1	7.87	39.1	4.14365	33	1	0.5	0.625	-0.222222	-0.0703125	0.222222	0.0703125	3.73943	0.0218825	Msi1
A0A1B0GR85	RIKEN cDNA 2900026A02 gene OS=Mus musculus OX=10090 GN=2900026A02Rik PE=1 SV=1	9.04	192.6	1.98076	16	2	0.5	0.625	-0.222222	-0.0703125	0.222222	0.0703125
G3X8Q1	Calcineurin-binding protein 1 OS=Mus musculus OX=10090 GN=Cabin1 PE=1 SV=1	6.01	243	1.55464	13	2	0.5	0.625	-0.222222	-0.0703125	0.222222	0.0703125
A0A1Y7VM38	NADH dehydrogenase [ubiquinone] iron-sulfur protein 6, mitochondrial OS=Mus musculus OX=10090 GN=Ndufs6 PE=1 SV=1	8.32	14.1	20.9677	30	2	1	1.25	-0.222222	-0.28125	0.222222	0.28125
Q99K48	Non-POU domain-containing octamer-binding protein OS=Mus musculus OX=10090 GN=Nono PE=1 SV=3	8.95	54.5	13.1078	160	6	4.5	5.625	-0.222222	-5.69531	0.222222	5.69531
P50247	Adenosylhomocysteinase OS=Mus musculus OX=10090 GN=Ahcy PE=1 SV=3	6.54	47.7	16.4352	153	6	5	6.25	-0.222222	-7.03125	0.222222	7.03125
P51491	Short-wave-sensitive opsin 1 OS=Mus musculus OX=10090 GN=Opn1sw PE=1 SV=1	8.35	38.9	11.2717	104	3	2.875	3.625	-0.230769	-2.4375	0.230769	2.4375
Q99P72	Reticulon-4 OS=Mus musculus OX=10090 GN=Rtn4 PE=1 SV=2	4.54	126.5	9.63855	257	8	6.625	8.375	-0.233333	-13.125	0.233333	13.125
P39053	Dynamin-1 OS=Mus musculus OX=10090 GN=Dnm1 PE=1 SV=2	7.74	97.7	8.18916	109	7	2.75	3.5	-0.24	-2.34375	0.24	2.34375
G5E829	Plasma membrane calcium-transporting ATPase 1 OS=Mus musculus OX=10090 GN=Atp2b1 PE=1 SV=1	5.91	134.7	5.81967	60	2	1.75	2.25	-0.25	-1	0.25	1
Q9JKC6	Cell cycle exit and neuronal differentiation protein 1 OS=Mus musculus OX=10090 GN=Cend1 PE=1 SV=1	8.97	15	19.4631	67	2	2.125	2.75	-0.25641	-1.52344	0.25641	1.52344	3.21147	0.037461	Cend1
O35215	D-dopachrome decarboxylase OS=Mus musculus OX=10090 GN=Ddt PE=1 SV=3	6.54	13.1	28.8136	101	3	2.5	3.25	-0.26087	-2.15625	0.26087	2.15625
Q60930	Voltage-dependent anion-selective channel protein 2 OS=Mus musculus OX=10090 GN=Vdac2 PE=1 SV=2	7.49	31.7	18.3051	194	5	5	6.5	-0.26087	-8.625	0.26087	8.625
Q9CWS0	N(G),N(G)-dimethylarginine dimethylaminohydrolase 1 OS=Mus musculus OX=10090 GN=Ddah1 PE=1 SV=3	5.97	31.4	18.5965	64	4	1.625	2.125	-0.266667	-0.9375	0.266667	0.9375
P56135	ATP synthase subunit f, mitochondrial OS=Mus musculus OX=10090 GN=Atp5mf PE=1 SV=3	9.95	10.3	26.1364	122	2	3.25	4.25	-0.266667	-3.75	0.266667	3.75
E9PWE8	Dihydropyrimidinase-related protein 3 OS=Mus musculus OX=10090 GN=Dpysl3 PE=1 SV=1	6.46	73.8	25.183	295	10	6.875	9	-0.267717	-16.8672	0.267717	16.8672
A0A5F8MPR1	Band 4.1-like protein 3 OS=Mus musculus OX=10090 GN=Epb41l3 PE=1 SV=1	5.31	105.6	4.73186	174	1	4.625	6.125	-0.27907	-8.0625	0.27907	8.0625
E1AZ71	Cyclic nucleotide-gated channel beta 1 OS=Mus musculus OX=10090 GN=Cngb1 PE=1 SV=1	4.53	148.6	1.43396	15	2	0.375	0.5	-0.285714	-0.0546875	0.285714	0.0546875
E9PY39	Predicted gene 20431 OS=Mus musculus OX=10090 GN=Gm20431 PE=3 SV=1	6.76	42.1	5.39084	12	2	0.375	0.5	-0.285714	-0.0546875	0.285714	0.0546875
Q9EP71	Ankycorbin OS=Mus musculus OX=10090 GN=Rai14 PE=1 SV=1	6.27	108.8	1.83861	10	2	0.375	0.5	-0.285714	-0.0546875	0.285714	0.0546875
Q69ZS6	Synaptic vesicle glycoprotein 2C OS=Mus musculus OX=10090 GN=Sv2c PE=1 SV=2	5.11	82.2	7.15268	51	1	0.75	1	-0.285714	-0.21875	0.285714	0.21875
D3YTQ3	Heterogeneous nuclear ribonucleoprotein D-like OS=Mus musculus OX=10090 GN=Hnrnpdl PE=1 SV=1	9.57	46.2	8.09524	120	1	3	4	-0.285714	-3.5	0.285714	3.5
Q8BTS0	DEAD box protein 5 OS=Mus musculus OX=10090 GN=Ddx5 PE=1 SV=1	8.92	69.2	13.9837	119	8	3	4	-0.285714	-3.5	0.285714	3.5
Q9Z204	Heterogeneous nuclear ribonucleoproteins C1/C2 OS=Mus musculus OX=10090 GN=Hnrnpc PE=1 SV=1	5.05	34.4	14.0575	82	4	1.75	2.375	-0.30303	-1.28906	0.30303	1.28906
P61205	ADP-ribosylation factor 3 OS=Mus musculus OX=10090 GN=Arf3 PE=2 SV=2	7.43	20.6	32.0442	129	3	3.25	4.5	-0.322581	-4.84375	0.322581	4.84375
Q62261	Spectrin beta chain, non-erythrocytic 1 OS=Mus musculus OX=10090 GN=Sptbn1 PE=1 SV=2	5.58	274.1	8.12526	91	12	2.5	3.5	-0.333333	-3	0.333333	3
P10649	Glutathione S-transferase Mu 1 OS=Mus musculus OX=10090 GN=Gstm1 PE=1 SV=2	7.94	26	29.8165	142	4	3.375	4.75	-0.338462	-5.58594	0.338462	5.58594
Q8R1W8	Interphotoreceptor matrix proteoglycan 1 OS=Mus musculus OX=10090 GN=Impg1 PE=1 SV=1	5.24	89.4	5.01253	79	4	2.125	3	-0.341463	-2.24219	0.341463	2.24219
B1AWE1	Clathrin light chain OS=Mus musculus OX=10090 GN=Clta PE=1 SV=1	4.49	24.9	24.7826	56	3	1.5	2.125	-0.344828	-1.13281	0.344828	1.13281
E9Q3G8	Nucleoporin 153 OS=Mus musculus OX=10090 GN=Nup153 PE=1 SV=1	8.84	151.9	1.09439	72	1	1.5	2.125	-0.344828	-1.13281	0.344828	1.13281
P27546	Microtubule-associated protein 4 OS=Mus musculus OX=10090 GN=Map4 PE=1 SV=3	4.98	117.4	4	60	1	1.5	2.125	-0.344828	-1.13281	0.344828	1.13281
F6XI62	60S ribosomal protein L7 (Fragment) OS=Mus musculus OX=10090 GN=Rpl7 PE=1 SV=1	11.12	32.5	12.5448	127	3	3	4.25	-0.344828	-4.53125	0.344828	4.53125
Q9ES97	Reticulon-3 OS=Mus musculus OX=10090 GN=Rtn3 PE=1 SV=2	4.92	103.8	1.97095	29	1	0.875	1.25	-0.352941	-0.398438	0.352941	0.398438
Q8VIJ6	Splicing factor, proline- and glutamine-rich OS=Mus musculus OX=10090 GN=Sfpq PE=1 SV=1	9.44	75.4	14.1631	61	6	1.75	2.5	-0.352941	-1.59375	0.352941	1.59375
P18242	Cathepsin D OS=Mus musculus OX=10090 GN=Ctsd PE=1 SV=1	7.15	44.9	6.82927	55	2	1.125	1.625	-0.363636	-0.6875	0.363636	0.6875
Q9Z273	Tubby-related protein 1 OS=Mus musculus OX=10090 GN=Tulp1 PE=1 SV=1	9.1	60.3	5.52486	48	2	1.125	1.625	-0.363636	-0.6875	0.363636	0.6875
A3QM89	Reticulon (Fragment) OS=Mus musculus OX=10090 GN=Rtn1 PE=1 SV=1	9.92	28.3	10.6719	14	2	0.25	0.375	-0.4	-0.0390625	0.4	0.0390625
B2RSU7	GRIP and coiled-coil domain containing 2 OS=Mus musculus OX=10090 GN=Gcc2 PE=1 SV=1	5.14	194.4	4.34524	5	3	0.25	0.375	-0.4	-0.0390625	0.4	0.0390625
Q5SUS9	RNA-binding protein EWS OS=Mus musculus OX=10090 GN=Ewsr1 PE=1 SV=1	9.29	69	1.36157	7	1	0.25	0.375	-0.4	-0.0390625	0.4	0.0390625
Q62318	Transcription intermediary factor 1-beta OS=Mus musculus OX=10090 GN=Trim28 PE=1 SV=3	5.77	88.8	1.07914	6	1	0.25	0.375	-0.4	-0.0390625	0.4	0.0390625
Q91VR5	ATP-dependent RNA helicase DDX1 OS=Mus musculus OX=10090 GN=Ddx1 PE=1 SV=1	7.21	82.4	4.05405	10	2	0.25	0.375	-0.4	-0.0390625	0.4	0.0390625
Q9DCD0	6-phosphogluconate dehydrogenase, decarboxylating OS=Mus musculus OX=10090 GN=Pgd PE=1 SV=3	7.23	53.2	4.34783	7	1	0.25	0.375	-0.4	-0.0390625	0.4	0.0390625
Q9Z1T6	1-phosphatidylinositol 3-phosphate 5-kinase OS=Mus musculus OX=10090 GN=Pikfyve PE=1 SV=3	6.68	236.7	3.38579	7	3	0.25	0.375	-0.4	-0.0390625	0.4	0.0390625
P62881	Guanine nucleotide-binding protein subunit beta-5 OS=Mus musculus OX=10090 GN=Gnb5 PE=1 SV=1	6.46	43.5	7.59494	20	3	0.5	0.75	-0.4	-0.15625	0.4	0.15625
Q149L6	DnaJ homolog subfamily B member 14 OS=Mus musculus OX=10090 GN=Dnajb14 PE=2 SV=1	8.59	42.3	8.70712	31	2	0.75	1.125	-0.4	-0.351562	0.4	0.351562
Q91YT0	NADH dehydrogenase [ubiquinone] flavoprotein 1, mitochondrial OS=Mus musculus OX=10090 GN=Ndufv1 PE=1 SV=1	8.21	50.8	2.15517	46	1	1	1.5	-0.4	-0.625	0.4	0.625
P61264	Syntaxin-1B OS=Mus musculus OX=10090 GN=Stx1b PE=1 SV=1	5.38	33.2	30.9028	118	7	3	4.625	-0.42623	-6.19531	0.42623	6.19531
P56564	Excitatory amino acid transporter 1 OS=Mus musculus OX=10090 GN=Slc1a3 PE=1 SV=2	8.4	59.6	13.2597	112	5	2.75	4.25	-0.428571	-5.25	0.428571	5.25
Q9WVQ0	Polyamine-modulated factor 1-binding protein 1 OS=Mus musculus OX=10090 GN=Pmfbp1 PE=2 SV=1	6.58	119.3	1.27202	31	1	0.625	1	-0.461538	-0.304688	0.461538	0.304688
Q8BH59	Calcium-binding mitochondrial carrier protein Aralar1 OS=Mus musculus OX=10090 GN=Slc25a12 PE=1 SV=1	8.25	74.5	16.3959	49	7	1.25	2	-0.461538	-1.21875	0.461538	1.21875
Q9R0P9	Ubiquitin carboxyl-terminal hydrolase isozyme L1 OS=Mus musculus OX=10090 GN=Uchl1 PE=1 SV=1	5.24	24.8	34.5291	113	5	2.5	4	-0.461538	-4.875	0.461538	4.875
Q8R1B5	Complexin-3 OS=Mus musculus OX=10090 GN=Cplx3 PE=1 SV=1	4.89	17.6	36.0759	90	5	2.375	3.875	-0.48	-4.6875	0.48	4.6875
D3Z7P3	Glutaminase kidney isoform, mitochondrial OS=Mus musculus OX=10090 GN=Gls PE=1 SV=1	7.99	73.9	7.71513	115	4	2.75	4.5	-0.482759	-6.34375	0.482759	6.34375
B6ZND9	Cone-rod homeobox, opposite strand OS=Mus musculus OX=10090 GN=Crxos PE=2 SV=1	9.38	17.2	11.9718	17	1	0.375	0.625	-0.5	-0.125	0.5	0.125
Q4VA93	Protein kinase C OS=Mus musculus OX=10090 GN=Prkca PE=1 SV=1	7.05	76.8	7.14286	9	3	0.375	0.625	-0.5	-0.125	0.5	0.125
P84104	Serine/arginine-rich splicing factor 3 OS=Mus musculus OX=10090 GN=Srsf3 PE=1 SV=1	11.65	19.3	21.3415	46	2	0.875	1.5	-0.526316	-0.742188	0.526316	0.742188
D3Z623	RIKEN cDNA 9330159F19 gene OS=Mus musculus OX=10090 GN=9330159F19Rik PE=1 SV=2	8.13	73.9	1.54321	25	1	0.5	0.875	-0.545455	-0.257812	0.545455	0.257812
Q9QXX4	Calcium-binding mitochondrial carrier protein Aralar2 OS=Mus musculus OX=10090 GN=Slc25a13 PE=1 SV=1	8.6	74.4	13.9053	20	2	0.5	0.875	-0.545455	-0.257812	0.545455	0.257812
Q9CPQ3	Mitochondrial import receptor subunit TOM22 homolog OS=Mus musculus OX=10090 GN=Tomm22 PE=1 SV=3	4.34	15.5	7.74648	26	1	0.625	1.125	-0.571429	-0.4375	0.571429	0.4375
Q9D023	Mitochondrial pyruvate carrier 2 OS=Mus musculus OX=10090 GN=Mpc2 PE=1 SV=1	10.61	14.3	7.87402	88	1	1.875	3.375	-0.571429	-3.9375	0.571429	3.9375	6.87101	0.00123191	Mpc2
Q8BL97	Serine/arginine-rich splicing factor 7 OS=Mus musculus OX=10090 GN=Srsf7 PE=1 SV=1	11.9	30.8	9.73783	63	1	1.375	2.5	-0.580645	-2.17969	0.580645	2.17969
Q64433	10 kDa heat shock protein, mitochondrial OS=Mus musculus OX=10090 GN=Hspe1 PE=1 SV=2	8.35	11	36.2745	56	4	1.5	2.75	-0.588235	-2.65625	0.588235	2.65625
Q9CR62	Mitochondrial 2-oxoglutarate/malate carrier protein OS=Mus musculus OX=10090 GN=Slc25a11 PE=1 SV=3	9.94	34.1	10.828	35	3	0.875	1.625	-0.6	-0.9375	0.6	0.9375
A0A494B9Q6	Alpha-crystallin A chain OS=Mus musculus OX=10090 GN=Cryaa PE=1 SV=1	7.08	23.1	44.0594	216	8	7.5	14	-0.604651	-69.875	0.604651	69.875
A2AF47	Dedicator of cytokinesis protein 11 OS=Mus musculus OX=10090 GN=Dock11 PE=1 SV=1	7.78	237.6	0.482393	10	1	0.125	0.25	-0.666667	-0.0234375	0.666667	0.0234375
A2APF3	Transcriptional repressor CTCFL OS=Mus musculus OX=10090 GN=Ctcfl PE=1 SV=1	8.05	73.1	1.41509	8	1	0.125	0.25	-0.666667	-0.0234375	0.666667	0.0234375
A2AUM1	Non-specific serine/threonine protein kinase OS=Mus musculus OX=10090 GN=Eif2ak4 PE=1 SV=1	6.49	177.8	1.0828	4	2	0.125	0.25	-0.666667	-0.0234375	0.666667	0.0234375
D3Z689	ADAMTS-like 5 OS=Mus musculus OX=10090 GN=Adamtsl5 PE=1 SV=1	8.13	53.6	2.06186	5	1	0.125	0.25	-0.666667	-0.0234375	0.666667	0.0234375
E9PWQ7	Zonadhesin OS=Mus musculus OX=10090 GN=Zan PE=1 SV=1	5.33	584.3	1.60517	6	4	0.125	0.25	-0.666667	-0.0234375	0.666667	0.0234375
E9Q3L4	Interferon-activated gene 207 OS=Mus musculus OX=10090 GN=Ifi207 PE=1 SV=2	9.35	104.4	1.94274	6	1	0.125	0.25	-0.666667	-0.0234375	0.666667	0.0234375
F8WHD8	Phosphoinositide 5-phosphatase OS=Mus musculus OX=10090 GN=Synj2 PE=1 SV=1	7.75	163.5	0.946586	11	1	0.125	0.25	-0.666667	-0.0234375	0.666667	0.0234375
F8WHL2	Coatomer subunit alpha OS=Mus musculus OX=10090 GN=Copa PE=1 SV=1	7.58	139.3	0.81103	8	1	0.125	0.25	-0.666667	-0.0234375	0.666667	0.0234375
G3UW85	Enhancer of rudimentary homolog OS=Mus musculus OX=10090 GN=Erh PE=1 SV=1	5.54	14.3	13.8211	7	1	0.125	0.25	-0.666667	-0.0234375	0.666667	0.0234375
M0QWZ1	Protein FAM193A OS=Mus musculus OX=10090 GN=Fam193a PE=1 SV=1	6.58	166.8	2.50494	6	2	0.125	0.25	-0.666667	-0.0234375	0.666667	0.0234375
O35643	AP-1 complex subunit beta-1 OS=Mus musculus OX=10090 GN=Ap1b1 PE=1 SV=2	5.17	103.9	1.59067	3	1	0.125	0.25	-0.666667	-0.0234375	0.666667	0.0234375
P10605	Cathepsin B OS=Mus musculus OX=10090 GN=Ctsb PE=1 SV=2	5.91	37.3	3.83481	4	1	0.125	0.25	-0.666667	-0.0234375	0.666667	0.0234375
P55821	Stathmin-2 OS=Mus musculus OX=10090 GN=Stmn2 PE=1 SV=1	8.32	20.8	5.58659	5	1	0.125	0.25	-0.666667	-0.0234375	0.666667	0.0234375
P62264	40S ribosomal protein S14 OS=Mus musculus OX=10090 GN=Rps14 PE=1 SV=3	10.05	16.3	7.28477	10	1	0.125	0.25	-0.666667	-0.0234375	0.666667	0.0234375
P62315	Small nuclear ribonucleoprotein Sm D1 OS=Mus musculus OX=10090 GN=Snrpd1 PE=1 SV=1	11.56	13.3	26.0504	5	2	0.125	0.25	-0.666667	-0.0234375	0.666667	0.0234375
P80316	T-complex protein 1 subunit epsilon OS=Mus musculus OX=10090 GN=Cct5 PE=1 SV=1	6.02	59.6	6.65434	3	2	0.125	0.25	-0.666667	-0.0234375	0.666667	0.0234375
Q14C59	Transmembrane protease serine 11B-like protein OS=Mus musculus OX=10090 GN=Tmprss11b PE=2 SV=2	8.19	46.7	4.32692	3	1	0.125	0.25	-0.666667	-0.0234375	0.666667	0.0234375
Q2V6D6	Guanylate-binding protein 8 OS=Mus musculus OX=10090 GN=Gbp8 PE=1 SV=1	5.6	60.6	1.71429	7	1	0.125	0.25	-0.666667	-0.0234375	0.666667	0.0234375
Q3U6B2	G-protein coupled receptor 183 OS=Mus musculus OX=10090 GN=Gpr183 PE=1 SV=1	8.98	40.2	3.36134	5	1	0.125	0.25	-0.666667	-0.0234375	0.666667	0.0234375
Q3UN70	Myelin regulatory factor-like protein OS=Mus musculus OX=10090 GN=Myrfl PE=2 SV=1	7.27	101.6	1.88053	5	2	0.125	0.25	-0.666667	-0.0234375	0.666667	0.0234375
Q50H33	BTB/POZ domain-containing protein KCTD8 OS=Mus musculus OX=10090 GN=Kctd8 PE=1 SV=1	8.38	52.7	7.14286	6	2	0.125	0.25	-0.666667	-0.0234375	0.666667	0.0234375
Q61419	Cytidine monophosphate-N-acetylneuraminic acid hydroxylase OS=Mus musculus OX=10090 GN=Cmah PE=1 SV=1	6.38	66.9	6.06586	8	3	0.125	0.25	-0.666667	-0.0234375	0.666667	0.0234375
Q62093	Serine/arginine-rich splicing factor 2 OS=Mus musculus OX=10090 GN=Srsf2 PE=1 SV=4	11.85	25.5	19.457	10	4	0.125	0.25	-0.666667	-0.0234375	0.666667	0.0234375
Q6PER3	Microtubule-associated protein RP/EB family member 3 OS=Mus musculus OX=10090 GN=Mapre3 PE=1 SV=1	5.54	31.9	2.84698	3	1	0.125	0.25	-0.666667	-0.0234375	0.666667	0.0234375
Q6ZWV7	60S ribosomal protein L35 OS=Mus musculus OX=10090 GN=Rpl35 PE=1 SV=1	11.05	14.5	8.13008	6	1	0.125	0.25	-0.666667	-0.0234375	0.666667	0.0234375
Q80SW1	S-adenosylhomocysteine hydrolase-like protein 1 OS=Mus musculus OX=10090 GN=Ahcyl1 PE=1 SV=1	6.89	58.9	6.22642	8	2	0.125	0.25	-0.666667	-0.0234375	0.666667	0.0234375
Q8CGV4	Retinol dehydrogenase 1 (All trans) OS=Mus musculus OX=10090 GN=Rdh1 PE=2 SV=1	9.1	35.9	2.2082	5	1	0.125	0.25	-0.666667	-0.0234375	0.666667	0.0234375
Q922B1	ADP-ribose glycohydrolase MACROD1 OS=Mus musculus OX=10090 GN=Macrod1 PE=1 SV=2	8.85	35.3	2.47678	4	1	0.125	0.25	-0.666667	-0.0234375	0.666667	0.0234375
Q925J9	Mediator of RNA polymerase II transcription subunit 1 OS=Mus musculus OX=10090 GN=Med1 PE=1 SV=2	8.73	167	4.38095	3	3	0.125	0.25	-0.666667	-0.0234375	0.666667	0.0234375
Q9CTN8	LHFPL tetraspan subfamily member 3 protein OS=Mus musculus OX=10090 GN=Lhfpl3 PE=2 SV=2	5.95	24.7	18.018	4	2	0.125	0.25	-0.666667	-0.0234375	0.666667	0.0234375
Q9WTX5	S-phase kinase-associated protein 1 OS=Mus musculus OX=10090 GN=Skp1 PE=1 SV=3	4.54	18.7	7.97546	8	1	0.125	0.25	-0.666667	-0.0234375	0.666667	0.0234375
Q9WU62	Inner centromere protein OS=Mus musculus OX=10090 GN=Incenp PE=1 SV=2	9.55	101.1	1.25	3	1	0.125	0.25	-0.666667	-0.0234375	0.666667	0.0234375
A0A0A0MQN6	Cone-rod homeobox protein OS=Mus musculus OX=10090 GN=Crx PE=4 SV=1	9.42	34.9	3.71517	10	1	0.25	0.5	-0.666667	-0.09375	0.666667	0.09375
A0A5F8MPB9	Radixin OS=Mus musculus OX=10090 GN=Rdx PE=1 SV=1	6.54	71	1.49007	16	1	0.25	0.5	-0.666667	-0.09375	0.666667	0.09375
A0A2I3BQC3	Small integral membrane protein 40 OS=Mus musculus OX=10090 GN=Smim40 PE=4 SV=1	4.42	9.2	8.64198	15	1	0.375	0.75	-0.666667	-0.210938	0.666667	0.210938
P62245	40S ribosomal protein S15a OS=Mus musculus OX=10090 GN=Rps15a PE=1 SV=2	10.13	14.8	6.15385	13	1	0.375	0.75	-0.666667	-0.210938	0.666667	0.210938
Q9CZC8	Secernin-1 OS=Mus musculus OX=10090 GN=Scrn1 PE=1 SV=1	4.79	46.3	4.83092	27	2	0.375	0.75	-0.666667	-0.210938	0.666667	0.210938
Q62048	Astrocytic phosphoprotein PEA-15 OS=Mus musculus OX=10090 GN=Pea15 PE=1 SV=1	5.02	15	18.4615	39	2	0.5	1	-0.666667	-0.375	0.666667	0.375
Q9D0E1	Heterogeneous nuclear ribonucleoprotein M OS=Mus musculus OX=10090 GN=Hnrnpm PE=1 SV=3	8.63	77.6	9.19067	25	5	0.5	1	-0.666667	-0.375	0.666667	0.375
Q9Z2D6	Methyl-CpG-binding protein 2 OS=Mus musculus OX=10090 GN=Mecp2 PE=1 SV=1	9.96	52.3	14.876	37	5	1	2	-0.666667	-1.5	0.666667	1.5
P24549	Aldehyde dehydrogenase 1A1 OS=Mus musculus OX=10090 GN=Aldh1a1 PE=1 SV=5	7.8	54.4	14.1717	62	5	1.25	2.5	-0.666667	-2.34375	0.666667	2.34375
P23927	Alpha-crystallin B chain OS=Mus musculus OX=10090 GN=Cryab PE=1 SV=2	7.33	20.1	30.2857	102	6	3.125	6.5	-0.701299	-16.2422	0.701299	16.2422
Q91V41	Ras-related protein Rab-14 OS=Mus musculus OX=10090 GN=Rab14 PE=1 SV=3	6.21	23.9	21.8605	38	2	0.75	1.625	-0.736842	-1.03906	0.736842	1.03906
Q6Q477	Plasma membrane calcium-transporting ATPase 4 OS=Mus musculus OX=10090 GN=Atp2b4 PE=1 SV=1	6.13	133	5.39419	32	1	0.625	1.375	-0.75	-0.75	0.75	0.75
P08113	Endoplasmin OS=Mus musculus OX=10090 GN=Hsp90b1 PE=1 SV=2	4.82	92.4	5.86035	90	3	1.75	3.875	-0.755556	-5.97656	0.755556	5.97656
E9PVX6	Proliferation marker protein Ki-67 OS=Mus musculus OX=10090 GN=Mki67 PE=1 SV=1	9.72	350.7	0.377715	25	1	0.375	0.875	-0.8	-0.3125	0.8	0.3125
P23198	Chromobox protein homolog 3 OS=Mus musculus OX=10090 GN=Cbx3 PE=1 SV=2	5.22	20.8	22.9508	21	3	0.375	0.875	-0.8	-0.3125	0.8	0.3125
Q99LI7	Cleavage stimulation factor subunit 3 OS=Mus musculus OX=10090 GN=Cstf3 PE=1 SV=1	8.12	82.8	0.97629	8	1	0.25	0.625	-0.857143	-0.164062	0.857143	0.164062	4.11824	0.0150241	Cstf3
A0A140T8R5	Protein Jade-3 OS=Mus musculus OX=10090 GN=Jade3 PE=1 SV=1	7.02	93.5	2.91262	8	2	0.25	0.625	-0.857143	-0.164062	0.857143	0.164062
A0A171EBL2	E3 ubiquitin-protein ligase RNF213 OS=Mus musculus OX=10090 GN=Rnf213 PE=1 SV=1	6.79	584.3	1.12599	12	3	0.25	0.625	-0.857143	-0.164062	0.857143	0.164062
P62137	Serine/threonine-protein phosphatase PP1-alpha catalytic subunit OS=Mus musculus OX=10090 GN=Ppp1ca PE=1 SV=1	6.33	37.5	11.5152	8	4	0.25	0.625	-0.857143	-0.164062	0.857143	0.164062
P62960	Y-box-binding protein 1 OS=Mus musculus OX=10090 GN=Ybx1 PE=1 SV=3	9.88	35.7	9.31677	18	2	0.25	0.625	-0.857143	-0.164062	0.857143	0.164062
P62962	Profilin-1 OS=Mus musculus OX=10090 GN=Pfn1 PE=1 SV=2	8.28	14.9	15.7143	15	2	0.25	0.625	-0.857143	-0.164062	0.857143	0.164062
Q91WD9	Secretagogin OS=Mus musculus OX=10090 GN=Scgn PE=2 SV=1	5.19	32.1	7.24638	11	2	0.25	0.625	-0.857143	-0.164062	0.857143	0.164062
Q9D4E6	Polyadenylate-binding protein OS=Mus musculus OX=10090 GN=Pabpc6 PE=1 SV=1	9.26	71	13.2193	19	1	0.25	0.625	-0.857143	-0.164062	0.857143	0.164062
Q9ET01	Glycogen phosphorylase, liver form OS=Mus musculus OX=10090 GN=Pygl PE=1 SV=4	7.09	97.4	4.11765	34	1	0.625	1.625	-0.888889	-1.125	0.888889	1.125
Q9JHU4	Cytoplasmic dynein 1 heavy chain 1 OS=Mus musculus OX=10090 GN=Dync1h1 PE=1 SV=2	6.42	531.7	3.59604	33	14	0.625	1.625	-0.888889	-1.125	0.888889	1.125
Q8CI94	Glycogen phosphorylase, brain form OS=Mus musculus OX=10090 GN=Pygb PE=1 SV=3	6.73	96.7	5.10083	38	1	0.625	1.75	-0.947368	-1.33594	0.947368	1.33594
A0A087WSG8	Mucin-2 OS=Mus musculus OX=10090 GN=Muc2 PE=1 SV=2	5.48	479	1.37675	6	2	0.125	0.375	-1	-0.0625	1	0.0625
A0A0R4J069	Selenocysteine lyase OS=Mus musculus OX=10090 GN=Scly PE=1 SV=1	6.67	47.2	12.7315	7	1	0.125	0.375	-1	-0.0625	1	0.0625
A0A0R4J0I9	Prolow-density lipoprotein receptor-related protein 1 OS=Mus musculus OX=10090 GN=Lrp1 PE=1 SV=1	5.36	504.4	4.44444	10	8	0.125	0.375	-1	-0.0625	1	0.0625
A0A0R4J1N0	Dihydropyrimidinase-related protein 4 OS=Mus musculus OX=10090 GN=Dpysl4 PE=1 SV=1	7.09	64.3	7.9258	9	2	0.125	0.375	-1	-0.0625	1	0.0625
A0A1B0GT24	Profilin OS=Mus musculus OX=10090 GN=Pfn5 PE=3 SV=1	5.95	16.8	2.63158	4	1	0.125	0.375	-1	-0.0625	1	0.0625
A0A3B2W864	Predicted gene, 49804 OS=Mus musculus OX=10090 GN=Gm49804 PE=3 SV=1	9.22	32.7	3.13589	7	1	0.125	0.375	-1	-0.0625	1	0.0625
F8VPR1	Leiomodin-1 OS=Mus musculus OX=10090 GN=Lmod1 PE=1 SV=1	9.19	66.2	1.17647	13	1	0.125	0.375	-1	-0.0625	1	0.0625
J3QJW3	Calcium-dependent secretion activator 1 OS=Mus musculus OX=10090 GN=Cadps PE=1 SV=1	5.85	153.1	3.53982	4	3	0.125	0.375	-1	-0.0625	1	0.0625
P62305	Small nuclear ribonucleoprotein E OS=Mus musculus OX=10090 GN=Snrpe PE=1 SV=1	9.44	10.8	11.9565	9	1	0.125	0.375	-1	-0.0625	1	0.0625
P62852	40S ribosomal protein S25 OS=Mus musculus OX=10090 GN=Rps25 PE=1 SV=1	10.11	13.7	7.2	11	1	0.125	0.375	-1	-0.0625	1	0.0625
Q14CH1	Molybdenum cofactor sulfurase OS=Mus musculus OX=10090 GN=Mocos PE=1 SV=1	6.62	95	0.812065	4	1	0.125	0.375	-1	-0.0625	1	0.0625
Q6NSV7	Primary cilium assembly protein FAM149B1 OS=Mus musculus OX=10090 GN=Fam149b1 PE=2 SV=1	6.93	63.2	8.65052	6	2	0.125	0.375	-1	-0.0625	1	0.0625
Q80X81	Acetyl-Coenzyme A acetyltransferase 3 OS=Mus musculus OX=10090 GN=Acat3 PE=1 SV=1	7.94	41.4	2.01511	4	1	0.125	0.375	-1	-0.0625	1	0.0625
Q8R2Q4	Ribosome-releasing factor 2, mitochondrial OS=Mus musculus OX=10090 GN=Gfm2 PE=1 SV=2	6.43	86.1	9.49936	5	3	0.125	0.375	-1	-0.0625	1	0.0625
Q9R0Y5	Adenylate kinase isoenzyme 1 OS=Mus musculus OX=10090 GN=Ak1 PE=1 SV=1	5.81	21.5	6.70103	8	1	0.125	0.375	-1	-0.0625	1	0.0625
Q9Z2I9	Succinate--CoA ligase [ADP-forming] subunit beta, mitochondrial OS=Mus musculus OX=10090 GN=Sucla2 PE=1 SV=2	7.01	50.1	7.5594	6	3	0.125	0.375	-1	-0.0625	1	0.0625
P14869	60S acidic ribosomal protein P0 OS=Mus musculus OX=10090 GN=Rplp0 PE=1 SV=3	6.25	34.2	20.1893	27	4	0.25	0.75	-1	-0.25	1	0.25	2.98353	0.0474749	Rplp0
D3Z5M6	Adhesion G protein-coupled receptor L3 OS=Mus musculus OX=10090 GN=Adgrl3 PE=1 SV=1	6.74	175.6	0.56962	16	1	0.25	0.75	-1	-0.25	1	0.25
E9Q048	ER membrane-associated RNA degradation OS=Mus musculus OX=10090 GN=Ermard PE=1 SV=1	6.77	70.3	1.28617	14	1	0.25	0.75	-1	-0.25	1	0.25
O08644	Ephrin type-B receptor 6 OS=Mus musculus OX=10090 GN=Ephb6 PE=2 SV=4	6.83	110	0.788955	16	1	0.25	0.75	-1	-0.25	1	0.25
P29341	Polyadenylate-binding protein 1 OS=Mus musculus OX=10090 GN=Pabpc1 PE=1 SV=2	9.5	70.6	8.1761	20	1	0.25	0.75	-1	-0.25	1	0.25
P61922	4-aminobutyrate aminotransferase, mitochondrial OS=Mus musculus OX=10090 GN=Abat PE=1 SV=1	8.09	56.4	10.4	11	4	0.25	0.75	-1	-0.25	1	0.25
Q99J36	THUMP domain-containing protein 1 OS=Mus musculus OX=10090 GN=Thumpd1 PE=1 SV=1	6.07	38.9	3.14286	20	1	0.25	0.75	-1	-0.25	1	0.25
Q9CY58	Plasminogen activator inhibitor 1 RNA-binding protein OS=Mus musculus OX=10090 GN=Serbp1 PE=1 SV=2	8.54	44.7	3.9312	23	1	0.375	1.125	-1	-0.5625	1	0.5625
Q8JZS0	Protein lin-7 homolog A OS=Mus musculus OX=10090 GN=Lin7a PE=1 SV=2	8.72	26	17.5966	35	3	0.5	1.5	-1	-1	1	1
Q9JKD3	Secretory carrier-associated membrane protein 5 OS=Mus musculus OX=10090 GN=Scamp5 PE=1 SV=1	8.54	26.1	4.68085	26	1	0.5	1.5	-1	-1	1	1
Q9WUB3	Glycogen phosphorylase, muscle form OS=Mus musculus OX=10090 GN=Pygm PE=1 SV=3	7.11	97.2	6.53207	35	2	0.5	1.625	-1.05882	-1.19531	1.05882	1.19531
Q1W617	Protein Shroom4 OS=Mus musculus OX=10090 GN=Shroom4 PE=1 SV=1	6.73	163.1	6.64407	20	3	0.375	1.25	-1.07692	-0.710938	1.07692	0.710938
P01831	Thy-1 membrane glycoprotein OS=Mus musculus OX=10090 GN=Thy1 PE=1 SV=1	8.97	18.1	15.4321	29	2	0.375	1.375	-1.14286	-0.875	1.14286	0.875
P29974	cGMP-gated cation channel alpha-1 OS=Mus musculus OX=10090 GN=Cnga1 PE=2 SV=2	7.58	79.4	4.09357	30	1	0.375	1.375	-1.14286	-0.875	1.14286	0.875
F6SEU4	Ras/Rap GTPase-activating protein SynGAP OS=Mus musculus OX=10090 GN=Syngap1 PE=1 SV=2	8.98	148.1	0.746269	33	1	0.5	1.875	-1.15789	-1.63281	1.15789	1.63281	4.22555	0.0135259	Syngap1
Q7TMK9	Heterogeneous nuclear ribonucleoprotein Q OS=Mus musculus OX=10090 GN=Syncrip PE=1 SV=2	8.59	69.6	4.49438	5	1	0.125	0.5	-1.2	-0.117188	1.2	0.117188	4.59772	0.00944273	Syncrip
A2CEK3	Phosphoglucomutase-1 OS=Mus musculus OX=10090 GN=Pgm1 PE=1 SV=1	5.72	63.7	5.51724	13	3	0.125	0.5	-1.2	-0.117188	1.2	0.117188	2.94382	0.0494894	Pgm1
A0A0N4SW28	Guanine nucleotide-binding protein subunit gamma OS=Mus musculus OX=10090 GN=Gng12 PE=1 SV=1	9.25	9.2	19.2771	10	1	0.125	0.5	-1.2	-0.117188	1.2	0.117188
B2RPS7	Short transient receptor potential channel 1 OS=Mus musculus OX=10090 GN=Trpc1 PE=1 SV=1	8.05	92.7	0.988875	10	1	0.125	0.5	-1.2	-0.117188	1.2	0.117188
F8VQ95	Transforming acidic coiled-coil-containing protein 1 OS=Mus musculus OX=10090 GN=Tacc1 PE=1 SV=1	5.03	84.2	1.03093	8	1	0.125	0.5	-1.2	-0.117188	1.2	0.117188
P33242	Steroidogenic factor 1 OS=Mus musculus OX=10090 GN=Nr5a1 PE=1 SV=3	7.53	52	5.19481	5	2	0.125	0.5	-1.2	-0.117188	1.2	0.117188
P62748	Hippocalcin-like protein 1 OS=Mus musculus OX=10090 GN=Hpcal1 PE=1 SV=2	5.5	22.3	12.4352	15	2	0.125	0.5	-1.2	-0.117188	1.2	0.117188
E9PV14	Band 4.1-like protein 1 OS=Mus musculus OX=10090 GN=Epb41l1 PE=1 SV=2	5.39	169.8	5.78406	21	2	0.25	1	-1.2	-0.46875	1.2	0.46875
P42669	Transcriptional activator protein Pur-alpha OS=Mus musculus OX=10090 GN=Pura PE=1 SV=1	6.44	34.9	2.80374	22	1	0.25	1	-1.2	-0.46875	1.2	0.46875
Q3UV17	Keratin, type II cytoskeletal 2 oral OS=Mus musculus OX=10090 GN=Krt76 PE=1 SV=1	8.43	62.8	2.6936	21	1	0.25	1	-1.2	-0.46875	1.2	0.46875
G5E866	Splicing factor 3B subunit 1 OS=Mus musculus OX=10090 GN=Sf3b1 PE=1 SV=1	7.09	145.7	1.45706	18	1	0.25	1.125	-1.27273	-0.601562	1.27273	0.601562	3.91042	0.0184478	Sf3b1
Q99PT1	Rho GDP-dissociation inhibitor 1 OS=Mus musculus OX=10090 GN=Arhgdia PE=1 SV=3	5.2	23.4	15.1961	35	2	0.375	1.75	-1.29412	-1.46094	1.29412	1.46094	4.61121	0.00932182	Arhgdia
A0A5F8MQ17	Aquaporin-4 OS=Mus musculus OX=10090 GN=Aqp4 PE=1 SV=1	5.8	35.3	7.57576	10	2	0.125	0.625	-1.33333	-0.1875	1.33333	0.1875
P63280	SUMO-conjugating enzyme UBC9 OS=Mus musculus OX=10090 GN=Ube2i PE=1 SV=1	8.66	18	11.3924	12	1	0.125	0.625	-1.33333	-0.1875	1.33333	0.1875
Q62398	Cyclic nucleotide-gated olfactory channel OS=Mus musculus OX=10090 GN=Cnga2 PE=2 SV=2	6.81	76.1	14.006	14	2	0.125	0.625	-1.33333	-0.1875	1.33333	0.1875
P46638	Ras-related protein Rab-11B OS=Mus musculus OX=10090 GN=Rab11b PE=1 SV=3	5.94	24.5	5.04587	20	1	0.25	1.25	-1.33333	-0.75	1.33333	0.75
Q91WD8	Solute carrier family 24 (Sodium/potassium/calcium exchanger), member 1 OS=Mus musculus OX=10090 GN=Slc24a1 PE=2 SV=1	4.65	124.6	4.86726	22	3	0.25	1.25	-1.33333	-0.75	1.33333	0.75
Q8R1S0	Ubiquinone biosynthesis monooxygenase COQ6, mitochondrial OS=Mus musculus OX=10090 GN=Coq6 PE=1 SV=3	7.17	51.4	1.89076	22	1	0.125	0.75	-1.42857	-0.273438	1.42857	0.273438
Q9JII6	Aldo-keto reductase family 1 member A1 OS=Mus musculus OX=10090 GN=Akr1a1 PE=1 SV=3	7.39	36.6	3.07692	23	1	0.125	0.75	-1.42857	-0.273438	1.42857	0.273438
P60904	DnaJ homolog subfamily C member 5 OS=Mus musculus OX=10090 GN=Dnajc5 PE=1 SV=1	5.07	22.1	15.1515	31	3	0.25	1.5	-1.42857	-1.09375	1.42857	1.09375
Q08642	Protein-arginine deiminase type-2 OS=Mus musculus OX=10090 GN=Padi2 PE=1 SV=2	5.53	76.2	2.08024	18	1	0.125	0.875	-1.5	-0.375	1.5	0.375
P62696	Beta-crystallin B2 OS=Mus musculus OX=10090 GN=Crybb2 PE=1 SV=2	7.01	23.4	72.6829	200	12	2.125	16.875	-1.55263	-140.125	1.55263	140.125
Q7TNV0	Protein DEK OS=Mus musculus OX=10090 GN=Dek PE=1 SV=1	6.86	43.1	5.78947	29	2	0.125	1.25	-1.63636	-0.773438	1.63636	0.773438
A3RLD5	Gamma-crystallin C OS=Mus musculus OX=10090 GN=Crygc PE=2 SV=1	7.61	21	77.1429	101	6	0.75	11.875	-1.76238	-70.2266	1.76238	70.2266
P04344	Gamma-crystallin B OS=Mus musculus OX=10090 GN=Crygb PE=2 SV=4	7.24	21.1	68	110	3	0.75	13	-1.78182	-84.2188	1.78182	84.2188
Q9JJU9	Beta-crystallin B3 OS=Mus musculus OX=10090 GN=Crybb3 PE=2 SV=3	7.23	24.3	68.2464	79	12	0.125	9.75	-1.94937	-47.5234	1.94937	47.5234
Q8VDC1	FYVE and coiled-coil domain-containing protein 1 OS=Mus musculus OX=10090 GN=Fyco1 PE=1 SV=1	4.98	162.2	0.765484	1	1	0	0.125	-2	-0.0078125	2	0.0078125	4.39394	0.0114851	Abhd17c
E9PYH2	Cytosolic acyl coenzyme A thioester hydrolase OS=Mus musculus OX=10090 GN=Acot7 PE=1 SV=1	8.68	42.8	5.72917	6	2	0	0.125	-2	-0.0078125	2	0.0078125	3.09203	0.042397	Acot7
A0A087WNP5	Predicted gene 10778 OS=Mus musculus OX=10090 GN=Gm10778 PE=1 SV=1	8.5	58	3.00601	1	1	0	0.125	-2	-0.0078125	2	0.0078125
A0A087WQP5	Keratin-associated protein 28-13 OS=Mus musculus OX=10090 GN=Krtap28-13 PE=4 SV=1	7.74	11.9	26.087	1	1	0	0.125	-2	-0.0078125	2	0.0078125
A0A087WQS2	Basic leucine zipper and W2 domain-containing protein 1 OS=Mus musculus OX=10090 GN=Bzw1 PE=1 SV=1	6.95	51.2	2.43902	1	1	0	0.125	-2	-0.0078125	2	0.0078125
A0A087WQU2	Retinoblastoma-binding protein 5 (Fragment) OS=Mus musculus OX=10090 GN=Rbbp5 PE=1 SV=1	5.39	12	34.5794	1	1	0	0.125	-2	-0.0078125	2	0.0078125
A0A087WRB8	Dystonin (Fragment) OS=Mus musculus OX=10090 GN=Dst PE=1 SV=1	5.99	170.1	2.10741	2	1	0	0.125	-2	-0.0078125	2	0.0078125
A0A0A0MQ73	[Histone H3]-lysine(4) N-methyltransferase OS=Mus musculus OX=10090 GN=Kmt2d PE=1 SV=1	5.78	599.9	0.268432	1	1	0	0.125	-2	-0.0078125	2	0.0078125
A0A0A6YXZ7	Protein O-mannosyl-transferase 1 (Fragment) OS=Mus musculus OX=10090 GN=Pomt1 PE=4 SV=1	6.24	7.2	26.1538	1	1	0	0.125	-2	-0.0078125	2	0.0078125
A0A0G2JDH9	Prominin-1 OS=Mus musculus OX=10090 GN=Prom1 PE=1 SV=1	6.49	93.4	2.39808	1	1	0	0.125	-2	-0.0078125	2	0.0078125
A0A0G2JEX1	Nexilin OS=Mus musculus OX=10090 GN=Nexn PE=1 SV=1	5.22	80	0.745156	1	1	0	0.125	-2	-0.0078125	2	0.0078125
A0A0G2JGF8	Rho GTPase-activating protein 29 (Fragment) OS=Mus musculus OX=10090 GN=Arhgap29 PE=1 SV=1	5.39	9.5	20.4819	1	1	0	0.125	-2	-0.0078125	2	0.0078125
A0A0G2JGY3	Immunoglobulin kappa variable 6-13 (Fragment) OS=Mus musculus OX=10090 GN=Igkv6-13 PE=1 SV=4	5.96	13.1	31.9328	1	1	0	0.125	-2	-0.0078125	2	0.0078125
A0A0J9YUD5	Nucleoporin 205 OS=Mus musculus OX=10090 GN=Nup205 PE=1 SV=1	6.62	233	2.28045	2	2	0	0.125	-2	-0.0078125	2	0.0078125
A0A0M3U1B0	Synaptonemal complex protein 2-like OS=Mus musculus OX=10090 GN=Sycp2l PE=2 SV=1	6.05	96	0.831354	1	1	0	0.125	-2	-0.0078125	2	0.0078125
A0A0N4SW01	Docking protein 1 OS=Mus musculus OX=10090 GN=Dok1 PE=1 SV=1	6.46	4.4	45.2381	1	1	0	0.125	-2	-0.0078125	2	0.0078125
A0A0R4J017	Teashirt homolog 3 OS=Mus musculus OX=10090 GN=Tshz3 PE=1 SV=1	7.03	118.6	2.40518	1	1	0	0.125	-2	-0.0078125	2	0.0078125
A0A0R4J024	DNA repair protein XRCC4 OS=Mus musculus OX=10090 GN=Xrcc4 PE=1 SV=1	5.25	37.1	5.21472	1	1	0	0.125	-2	-0.0078125	2	0.0078125
A0A0R4J050	N-acyl-L-amino-acid amidohydrolase OS=Mus musculus OX=10090 GN=Acy1 PE=1 SV=1	6.21	45.8	5.63725	2	1	0	0.125	-2	-0.0078125	2	0.0078125
A0A0R4J0C8	3'-5' exoribonuclease 1 OS=Mus musculus OX=10090 GN=Eri1 PE=1 SV=1	8.16	39.5	7.53623	1	1	0	0.125	-2	-0.0078125	2	0.0078125
A0A0R4J0I6	Acyl-CoA dehydrogenase family member 11 OS=Mus musculus OX=10090 GN=Acad11 PE=1 SV=1	8.43	87.3	2.82413	1	1	0	0.125	-2	-0.0078125	2	0.0078125
A0A0R4J124	SRSF protein kinase 2 OS=Mus musculus OX=10090 GN=Srpk2 PE=1 SV=1	4.91	76.8	3.51906	1	1	0	0.125	-2	-0.0078125	2	0.0078125
A0A0R4J160	Disintegrin and metalloproteinase domain-containing protein 25 OS=Mus musculus OX=10090 GN=Adam25 PE=4 SV=1	6.79	86.2	1.71053	1	1	0	0.125	-2	-0.0078125	2	0.0078125
A0A0R4J1K3	Coiled-coil domain-containing protein 151 OS=Mus musculus OX=10090 GN=Odad3 PE=1 SV=1	8.56	69.8	2.52525	1	1	0	0.125	-2	-0.0078125	2	0.0078125
A0A0R4J1K7	Hydrolethalus syndrome protein 1 homolog OS=Mus musculus OX=10090 GN=Hyls1 PE=1 SV=1	9.09	35.9	5.09554	1	1	0	0.125	-2	-0.0078125	2	0.0078125
A0A0U1RQ14	MICOS complex subunit MIC60 (Fragment) OS=Mus musculus OX=10090 GN=Immt PE=1 SV=1	7.37	33	9.34256	2	1	0	0.125	-2	-0.0078125	2	0.0078125
A0A140LHM6	Protein FAM181B OS=Mus musculus OX=10090 GN=Fam181b PE=4 SV=2	5.58	42.4	2.39808	2	1	0	0.125	-2	-0.0078125	2	0.0078125
A0A140LHT4	Predicted gene 9195 OS=Mus musculus OX=10090 GN=Gm9195 PE=4 SV=1	6.57	294.5	4.38503	4	4	0	0.125	-2	-0.0078125	2	0.0078125
A0A140LHZ9	Neuregulin 1 OS=Mus musculus OX=10090 GN=Nrg1 PE=1 SV=2	8.81	94.1	3.14685	1	1	0	0.125	-2	-0.0078125	2	0.0078125
A0A140LI88	Ankyrin repeat domain-containing protein 31 OS=Mus musculus OX=10090 GN=Ankrd31 PE=1 SV=2	6.62	206	0.969305	1	1	0	0.125	-2	-0.0078125	2	0.0078125
A0A140LIP2	Epithelial cell-transforming sequence 2 oncogene-like OS=Mus musculus OX=10090 GN=Ect2l PE=1 SV=1	8.43	109.6	2.93809	1	1	0	0.125	-2	-0.0078125	2	0.0078125
A0A1B0GR76	DNA helicase OS=Mus musculus OX=10090 GN=Chd9 PE=1 SV=1	7.25	211.4	1.4571	3	2	0	0.125	-2	-0.0078125	2	0.0078125
A0A1B0GRC4	VPS10 domain-containing receptor SorCS1 OS=Mus musculus OX=10090 GN=Sorcs1 PE=1 SV=1	7.27	132.6	6.96309	2	2	0	0.125	-2	-0.0078125	2	0.0078125
A0A1B0GRG8	Carbonyl reductase (NADPH) OS=Mus musculus OX=10090 GN=Gm5678 PE=3 SV=1	6.27	30.7	2.88809	1	1	0	0.125	-2	-0.0078125	2	0.0078125
A0A1B0GRU0	Vesicular glutamate transporter 1 OS=Mus musculus OX=10090 GN=Slc17a7 PE=1 SV=1	7.09	64.3	1.53846	1	1	0	0.125	-2	-0.0078125	2	0.0078125
A0A1B0GSW2	Predicted gene 28729 OS=Mus musculus OX=10090 GN=Gm28729 PE=4 SV=1	9.79	45.1	6.84597	1	1	0	0.125	-2	-0.0078125	2	0.0078125
A0A1B0GT42	Predicted gene, 32742 OS=Mus musculus OX=10090 GN=Gm32742 PE=4 SV=1	6.14	177	1.18454	1	1	0	0.125	-2	-0.0078125	2	0.0078125
A0A1D5RM23	Cleavage and polyadenylation specificity factor subunit 5 OS=Mus musculus OX=10090 GN=Nudt21 PE=1 SV=1	9.36	25.2	5.9633	1	1	0	0.125	-2	-0.0078125	2	0.0078125
A0A1D5RMN2	PDZ domain-containing protein GIPC1 (Fragment) OS=Mus musculus OX=10090 GN=Gipc1 PE=1 SV=1	6.15	11.7	13.3333	2	1	0	0.125	-2	-0.0078125	2	0.0078125
A0A1L1SQ41	Arginyl-tRNA--protein transferase 1 OS=Mus musculus OX=10090 GN=Ate1 PE=1 SV=1	7.8	64.1	1.78891	1	1	0	0.125	-2	-0.0078125	2	0.0078125
A0A1Y7VJ18	CUB domain-containing protein 2 OS=Mus musculus OX=10090 GN=Cdcp2 PE=4 SV=1	5.69	58.5	5.37037	1	1	0	0.125	-2	-0.0078125	2	0.0078125
A0A1Y7VJ80	Neuroepithelial cell-transforming gene 1 protein OS=Mus musculus OX=10090 GN=Net1 PE=1 SV=1	10.37	7.8	11.1111	1	1	0	0.125	-2	-0.0078125	2	0.0078125
A0A1Y7VJV2	RIKEN cDNA A030014E15 gene OS=Mus musculus OX=10090 GN=A030014E15Rik PE=4 SV=1	7.74	10.7	24.1667	1	1	0	0.125	-2	-0.0078125	2	0.0078125
A0A1Y7VLP4	PRAME-like 51 (Fragment) OS=Mus musculus OX=10090 GN=Pramel51 PE=4 SV=1	6.47	2.4	95.4545	1	1	0	0.125	-2	-0.0078125	2	0.0078125
A0A217FL61	NF-kappa-B inhibitor delta OS=Mus musculus OX=10090 GN=Nfkbid PE=1 SV=2	7.3	50.3	4.25532	1	1	0	0.125	-2	-0.0078125	2	0.0078125
A0A286YCZ6	Armadillo-like helical domain-containing 2 OS=Mus musculus OX=10090 GN=Armh2 PE=4 SV=1	9.03	27.7	10.5042	1	1	0	0.125	-2	-0.0078125	2	0.0078125
A0A286YD58	AP-3 complex subunit sigma-1 OS=Mus musculus OX=10090 GN=Ap3s1 PE=1 SV=1	8.21	6.4	22.2222	1	1	0	0.125	-2	-0.0078125	2	0.0078125
A0A286YD76	Microtubule-actin cross-linking factor 1 (Fragment) OS=Mus musculus OX=10090 GN=Macf1 PE=1 SV=1	4.51	147.1	1.54639	1	1	0	0.125	-2	-0.0078125	2	0.0078125
A0A286YE40	Urokinase-type plasminogen activator OS=Mus musculus OX=10090 GN=Plau PE=4 SV=1	8	3.8	54.2857	1	1	0	0.125	-2	-0.0078125	2	0.0078125
A0A2I3BPJ2	Predicted gene, 30083 OS=Mus musculus OX=10090 GN=Gm30083 PE=3 SV=1	8.95	64.2	5.58464	1	1	0	0.125	-2	-0.0078125	2	0.0078125
A0A2I3BPX3	Anoctamin OS=Mus musculus OX=10090 GN=Ano6 PE=1 SV=1	6.79	108.4	2.7897	1	1	0	0.125	-2	-0.0078125	2	0.0078125
A0A338P6H6	WD repeat-containing protein 27 OS=Mus musculus OX=10090 GN=Wdr27 PE=4 SV=1	8.05	91.2	3.39394	1	1	0	0.125	-2	-0.0078125	2	0.0078125
A0A3B2W3Z9	Vomeronasal 2, receptor 18 OS=Mus musculus OX=10090 GN=Vmn2r18 PE=4 SV=1	7.71	55.5	5.23013	1	1	0	0.125	-2	-0.0078125	2	0.0078125
A0A3B2W7L2	Serine/threonine-protein kinase 38 (Fragment) OS=Mus musculus OX=10090 GN=Stk38 PE=1 SV=1	5.82	30.1	3.44828	1	1	0	0.125	-2	-0.0078125	2	0.0078125
A0A3Q4EGE7	Ice protease-activating factor OS=Mus musculus OX=10090 GN=Nlrc4 PE=1 SV=1	6.06	118	0.3861	2	1	0	0.125	-2	-0.0078125	2	0.0078125
A0A3Q4EGK3	Latent-transforming growth factor beta-binding protein 1 OS=Mus musculus OX=10090 GN=Ltbp1 PE=1 SV=1	6.02	186.7	3.91127	2	2	0	0.125	-2	-0.0078125	2	0.0078125
A0A3Q4EI83	Cullin-2 OS=Mus musculus OX=10090 GN=Cul2 PE=1 SV=1	6.48	5.8	22.449	1	1	0	0.125	-2	-0.0078125	2	0.0078125
A0A494BB22	Phosphofurin acidic cluster sorting protein 1 (Fragment) OS=Mus musculus OX=10090 GN=Pacs1 PE=1 SV=1	9.64	13	15.9664	1	1	0	0.125	-2	-0.0078125	2	0.0078125
A0A571BEJ8	Coiled-coil domain-containing protein 30 OS=Mus musculus OX=10090 GN=Ccdc30 PE=1 SV=1	5.59	82.1	1.12518	1	1	0	0.125	-2	-0.0078125	2	0.0078125
A0A571BGG5	Dystonin (Fragment) OS=Mus musculus OX=10090 GN=Dst PE=1 SV=1	5.73	42.4	6.47668	1	1	0	0.125	-2	-0.0078125	2	0.0078125
A0A5F8MPL6	Neuronal-specific septin-3 OS=Mus musculus OX=10090 GN=Septin3 PE=1 SV=1	9.01	89.6	2.68949	1	1	0	0.125	-2	-0.0078125	2	0.0078125
A0A5F8MPN7	Queuine tRNA-ribosyltransferase accessory subunit 2 OS=Mus musculus OX=10090 GN=Qtrt2 PE=1 SV=1	6.16	46.4	1.92308	1	1	0	0.125	-2	-0.0078125	2	0.0078125
A0A5F8MPV5	Outer dense fiber protein 3B OS=Mus musculus OX=10090 GN=Odf3b PE=1 SV=1	10.27	27.9	5.90551	1	1	0	0.125	-2	-0.0078125	2	0.0078125
A0A668KL57	Transmembrane protein 94 OS=Mus musculus OX=10090 GN=Tmem94 PE=1 SV=1	6.48	152.8	2.0423	2	2	0	0.125	-2	-0.0078125	2	0.0078125
A1L3Q1	Persephin OS=Mus musculus OX=10090 GN=Pspn PE=2 SV=1	8.34	17	6.41026	1	1	0	0.125	-2	-0.0078125	2	0.0078125
A2A4E2	Family with sequence similarity 90, member A1A OS=Mus musculus OX=10090 GN=Fam90a1a PE=1 SV=1	9.8	47.2	3.0303	1	1	0	0.125	-2	-0.0078125	2	0.0078125
A2A654	Bromodomain PHD finger transcription factor OS=Mus musculus OX=10090 GN=Bptf PE=1 SV=1	6.83	333	0.724638	1	1	0	0.125	-2	-0.0078125	2	0.0078125
A2A6H3	F-box only protein 47 OS=Mus musculus OX=10090 GN=Fbxo47 PE=2 SV=2	8.35	51.3	10.643	1	1	0	0.125	-2	-0.0078125	2	0.0078125
A2A7F4	Rearranged L-myc fusion sequence OS=Mus musculus OX=10090 GN=Rlf PE=1 SV=1	6.71	217.3	0.417101	1	1	0	0.125	-2	-0.0078125	2	0.0078125
A2AED3	Fibronectin type III domain-containing protein 7 OS=Mus musculus OX=10090 GN=Fndc7 PE=2 SV=1	7.14	78.1	2.57802	1	1	0	0.125	-2	-0.0078125	2	0.0078125
A2AF28	Solute carrier family 25, member 53 OS=Mus musculus OX=10090 GN=Slc25a53 PE=1 SV=1	8.97	39	11.5607	1	1	0	0.125	-2	-0.0078125	2	0.0078125
A2AGB2	Uncharacterized protein C1orf87 homolog OS=Mus musculus OX=10090 GN=Gm12695 PE=4 SV=1	9.31	62.4	1.2844	1	1	0	0.125	-2	-0.0078125	2	0.0078125
A2AH75	Kinesin-like protein KIF1B OS=Mus musculus OX=10090 GN=Kif1b PE=1 SV=1	8.38	130	1.13043	2	1	0	0.125	-2	-0.0078125	2	0.0078125
A2AML7	Zinc finger protein 352 OS=Mus musculus OX=10090 GN=Zfp352 PE=4 SV=1	6.84	61.9	11.7967	2	2	0	0.125	-2	-0.0078125	2	0.0078125
A2AMR4	Fibronectin type III domain-containing protein 3C1 (Fragment) OS=Mus musculus OX=10090 GN=Fndc3c1 PE=4 SV=1	4.64	9.4	5.95238	1	1	0	0.125	-2	-0.0078125	2	0.0078125
A2AMT1	Filensin OS=Mus musculus OX=10090 GN=Bfsp1 PE=1 SV=1	5.95	73.6	3.8864	1	1	0	0.125	-2	-0.0078125	2	0.0078125
A2AS03	Helicase with zinc finger domain 2 OS=Mus musculus OX=10090 GN=Helz2 PE=1 SV=1	8	333.8	2.25589	2	2	0	0.125	-2	-0.0078125	2	0.0078125
A2AUM9	Centrosomal protein of 152 kDa OS=Mus musculus OX=10090 GN=Cep152 PE=1 SV=1	5.66	196.4	0.806452	1	1	0	0.125	-2	-0.0078125	2	0.0078125
A2CG63	AT-rich interactive domain-containing protein 4B OS=Mus musculus OX=10090 GN=Arid4b PE=1 SV=1	5.06	147.6	1.90259	5	2	0	0.125	-2	-0.0078125	2	0.0078125
A6H5Z6	Chordin OS=Mus musculus OX=10090 GN=Chrd PE=1 SV=1	7.62	103.6	2.98969	1	1	0	0.125	-2	-0.0078125	2	0.0078125
A7L9Z8	Calcium-transporting ATPase type 2C member 2 OS=Mus musculus OX=10090 GN=Atp2c2 PE=1 SV=1	6.44	102.5	4.55508	1	1	0	0.125	-2	-0.0078125	2	0.0078125
A8E0Y8	Immunoglobulin superfamily member 2 OS=Mus musculus OX=10090 GN=Cd101 PE=2 SV=1	8.02	114.1	1.45208	1	1	0	0.125	-2	-0.0078125	2	0.0078125
B0V2H2	Predicted gene 16181 OS=Mus musculus OX=10090 GN=Gm16181 PE=4 SV=1	7.03	8	35.6164	1	1	0	0.125	-2	-0.0078125	2	0.0078125
B1ASB3	AADACL4 family member 5 OS=Mus musculus OX=10090 GN=Aadacl4fm5 PE=4 SV=1	8.53	45.3	7.12468	1	1	0	0.125	-2	-0.0078125	2	0.0078125
B1ATU5	tRNA-dihydrouridine(16/17) synthase [NAD(P)(+)]-like OS=Mus musculus OX=10090 GN=Dus1l PE=1 SV=1	8.51	54.1	2.48963	1	1	0	0.125	-2	-0.0078125	2	0.0078125
B1AXB9	Testin OS=Mus musculus OX=10090 GN=Tesl1 PE=1 SV=1	8.62	46.8	3.40633	1	1	0	0.125	-2	-0.0078125	2	0.0078125
B1AY10	Transcriptional repressor NF-X1 OS=Mus musculus OX=10090 GN=Nfx1 PE=1 SV=1	8.31	123.7	2.33393	1	1	0	0.125	-2	-0.0078125	2	0.0078125
B1AYL1	Sodium channel protein OS=Mus musculus OX=10090 GN=Scn7a PE=1 SV=1	7.42	192.1	1.18977	1	1	0	0.125	-2	-0.0078125	2	0.0078125
B1B1A8	Myosin light chain kinase, smooth muscle OS=Mus musculus OX=10090 GN=Mylk PE=1 SV=1	6.25	213.5	1.33333	1	1	0	0.125	-2	-0.0078125	2	0.0078125
B2RQ20	Tyrosine-protein kinase OS=Mus musculus OX=10090 GN=Txk PE=1 SV=1	8.29	61.1	7.77989	2	2	0	0.125	-2	-0.0078125	2	0.0078125
B2RQE8	Rho GTPase-activating protein 42 OS=Mus musculus OX=10090 GN=Arhgap42 PE=1 SV=1	8	94.6	2.0214	1	1	0	0.125	-2	-0.0078125	2	0.0078125
B2RQR5	Small G protein signaling modulator 1 OS=Mus musculus OX=10090 GN=Sgsm1 PE=1 SV=1	5.66	123.2	2.19579	1	1	0	0.125	-2	-0.0078125	2	0.0078125
B2RSY5	A disintegrin and metallopeptidase domain 6 OS=Mus musculus OX=10090 GN=Adam6a PE=1 SV=1	7.75	85.1	3.44828	1	1	0	0.125	-2	-0.0078125	2	0.0078125
B2RT41	Zinc finger, C3H1-type-containing OS=Mus musculus OX=10090 GN=Zfc3h1 PE=1 SV=1	8.15	224.9	0.552209	1	1	0	0.125	-2	-0.0078125	2	0.0078125
B2RTN3	Zinc finger and SCAN domain-containing 5B OS=Mus musculus OX=10090 GN=Zscan5b PE=2 SV=1	7.25	53	5.98291	1	1	0	0.125	-2	-0.0078125	2	0.0078125
B2RVX0	Leucine rich repeat containing 30 OS=Mus musculus OX=10090 GN=Lrrc30 PE=2 SV=1	8.66	33.9	13.3333	1	1	0	0.125	-2	-0.0078125	2	0.0078125
B2RXC5	Zinc finger protein 382 OS=Mus musculus OX=10090 GN=Znf382 PE=1 SV=1	9.13	66.5	2.07254	1	1	0	0.125	-2	-0.0078125	2	0.0078125
B2RXE2	Sodium/hydrogen exchanger OS=Mus musculus OX=10090 GN=Slc9a5 PE=1 SV=1	7.31	98.9	2.33853	1	1	0	0.125	-2	-0.0078125	2	0.0078125
B2RXS4	Plexin-B2 OS=Mus musculus OX=10090 GN=Plxnb2 PE=1 SV=1	5.87	206.1	3.4202	2	2	0	0.125	-2	-0.0078125	2	0.0078125
B5X0E4	ATP-binding cassette sub-family B member 5 OS=Mus musculus OX=10090 GN=Abcb5 PE=2 SV=1	7.94	137.3	0.796813	1	1	0	0.125	-2	-0.0078125	2	0.0078125
B7ZD13	N-myc-interactor (Fragment) OS=Mus musculus OX=10090 GN=Nmi PE=1 SV=1	4.61	8.7	5.33333	3	1	0	0.125	-2	-0.0078125	2	0.0078125
B9EKP8	Sorbin and SH3 domain-containing protein 2 OS=Mus musculus OX=10090 GN=Sorbs2 PE=1 SV=1	8.28	136.1	2.14168	1	1	0	0.125	-2	-0.0078125	2	0.0078125
D3YW29	RNA exonuclease 5 OS=Mus musculus OX=10090 GN=Rexo5 PE=1 SV=1	8.98	86.4	2.89855	1	1	0	0.125	-2	-0.0078125	2	0.0078125
D3YWE3	Vomeronasal 2, receptor 84 OS=Mus musculus OX=10090 GN=Vmn2r84 PE=4 SV=1	6.83	96.4	2.4735	1	1	0	0.125	-2	-0.0078125	2	0.0078125
D3YX99	Complex I-SGDH (Fragment) OS=Mus musculus OX=10090 GN=Ndufb5 PE=1 SV=1	8.54	19.9	8.72093	1	1	0	0.125	-2	-0.0078125	2	0.0078125
D3YXP4	Advillin (Fragment) OS=Mus musculus OX=10090 GN=Avil PE=1 SV=1	6.51	8.8	16.6667	1	1	0	0.125	-2	-0.0078125	2	0.0078125
D3YXR0	Zinc finger MYND domain-containing protein 11 (Fragment) OS=Mus musculus OX=10090 GN=Zmynd11 PE=1 SV=1	8.37	33.2	8.74126	1	1	0	0.125	-2	-0.0078125	2	0.0078125
D3YYN5	Trem-like transcript 4 protein OS=Mus musculus OX=10090 GN=Treml4 PE=1 SV=1	6.96	29.4	14.0152	1	1	0	0.125	-2	-0.0078125	2	0.0078125
D3Z298	Carboxylic ester hydrolase OS=Mus musculus OX=10090 GN=Ces1h PE=3 SV=2	6.96	62	1.9573	1	1	0	0.125	-2	-0.0078125	2	0.0078125
D3Z437	Pro-cathepsin H (Fragment) OS=Mus musculus OX=10090 GN=Ctsh PE=1 SV=1	9	22.1	19.697	1	1	0	0.125	-2	-0.0078125	2	0.0078125
D3Z4L9	Tumor necrosis factor alpha-induced protein 2 OS=Mus musculus OX=10090 GN=Tnfaip2 PE=1 SV=2	6.24	79.9	0.847458	1	1	0	0.125	-2	-0.0078125	2	0.0078125
D3Z4R4	NK6 homeobox 2 OS=Mus musculus OX=10090 GN=Nkx6-2 PE=4 SV=1	9.7	29.3	7.22022	2	1	0	0.125	-2	-0.0078125	2	0.0078125
D3Z5G0	Interferon-activated gene 213 OS=Mus musculus OX=10090 GN=Ifi213 PE=3 SV=1	8.1	63.4	1.70648	1	1	0	0.125	-2	-0.0078125	2	0.0078125
D3Z5T8	RIKEN cDNA 4930407I10 gene OS=Mus musculus OX=10090 GN=4930407I10Rik PE=1 SV=2	8.09	168	1.19048	1	1	0	0.125	-2	-0.0078125	2	0.0078125
D3Z660	Serine (or cysteine) peptidase inhibitor, clade A (alpha-1 antiproteinase, antitrypsin), member 16 OS=Mus musculus OX=10090 GN=Serpina16 PE=3 SV=1	9.94	46.7	8.37321	1	1	0	0.125	-2	-0.0078125	2	0.0078125
D6RFR0	Nik-related protein kinase OS=Mus musculus OX=10090 GN=Nrk PE=1 SV=1	6.57	149.6	2.5641	1	1	0	0.125	-2	-0.0078125	2	0.0078125
D6RIJ4	Nuclear autoantigen Sp-100 OS=Mus musculus OX=10090 GN=Sp100 PE=1 SV=1	4.97	34.4	4.27632	1	1	0	0.125	-2	-0.0078125	2	0.0078125
E0CY68	Protein THEMIS OS=Mus musculus OX=10090 GN=Themis PE=1 SV=1	4.54	10.6	39.3617	1	1	0	0.125	-2	-0.0078125	2	0.0078125
E0CYV0	Protein-L-isoaspartate O-methyltransferase OS=Mus musculus OX=10090 GN=Pcmt1 PE=1 SV=1	7.24	30.4	4.8951	1	1	0	0.125	-2	-0.0078125	2	0.0078125
E5FYH1	Protein TOPAZ1 OS=Mus musculus OX=10090 GN=Topaz1 PE=2 SV=1	7.72	185.4	0.846945	1	1	0	0.125	-2	-0.0078125	2	0.0078125
E9PUD1	C-Jun-amino-terminal kinase-interacting protein 4 OS=Mus musculus OX=10090 GN=Spag9 PE=1 SV=1	5.33	127.8	3.42173	1	1	0	0.125	-2	-0.0078125	2	0.0078125
E9PUN6	A disintegrin-like and metallopeptidase (reprolysin type) with thrombospondin type 1 motif, 9 OS=Mus musculus OX=10090 GN=Adamts9 PE=1 SV=1	7.64	215.6	0.983946	1	1	0	0.125	-2	-0.0078125	2	0.0078125
E9PV58	Transportin-2 OS=Mus musculus OX=10090 GN=Tnpo2 PE=1 SV=1	5.01	101.4	7.13489	1	1	0	0.125	-2	-0.0078125	2	0.0078125
E9PV96	Olfactory receptor OS=Mus musculus OX=10090 GN=Olfr243 PE=3 SV=1	8.62	36.2	8.5443	1	1	0	0.125	-2	-0.0078125	2	0.0078125
E9PVI0	Vomeronasal 2, receptor 34 OS=Mus musculus OX=10090 GN=Vmn2r34 PE=4 SV=2	7.59	97.6	5.51643	1	1	0	0.125	-2	-0.0078125	2	0.0078125
E9PVP0	START domain-containing protein 10 OS=Mus musculus OX=10090 GN=Stard10 PE=1 SV=1	8.95	40.1	7.41758	1	1	0	0.125	-2	-0.0078125	2	0.0078125
E9PW21	Vomeronasal 2, receptor 74 OS=Mus musculus OX=10090 GN=Vmn2r74 PE=4 SV=1	8.32	98.1	2.93083	1	1	0	0.125	-2	-0.0078125	2	0.0078125
E9PXF8	Myotubularin-related protein 13 OS=Mus musculus OX=10090 GN=Sbf2 PE=1 SV=1	7.28	210.3	3.63248	2	2	0	0.125	-2	-0.0078125	2	0.0078125
E9PYF5	Vomeronasal 2, receptor 17 OS=Mus musculus OX=10090 GN=Vmn2r17 PE=4 SV=1	7.31	97	4.59364	1	1	0	0.125	-2	-0.0078125	2	0.0078125
E9PYI0	Adhesion G protein-coupled receptor F4 (Fragment) OS=Mus musculus OX=10090 GN=Adgrf4 PE=4 SV=1	8.41	7.7	26.8657	2	1	0	0.125	-2	-0.0078125	2	0.0078125
E9PYL2	Proline-rich protein 12 OS=Mus musculus OX=10090 GN=Prr12 PE=1 SV=1	7.65	211.7	2.06388	1	1	0	0.125	-2	-0.0078125	2	0.0078125
E9PZ08	FYN-binding protein 2 OS=Mus musculus OX=10090 GN=Fyb2 PE=1 SV=1	8.66	89.2	3.02648	1	1	0	0.125	-2	-0.0078125	2	0.0078125
E9PZ16	Basement membrane-specific heparan sulfate proteoglycan core protein OS=Mus musculus OX=10090 GN=Hspg2 PE=1 SV=1	6.47	469.5	1.25485	2	2	0	0.125	-2	-0.0078125	2	0.0078125
E9PZ91	Bis(5'-adenosyl)-triphosphatase OS=Mus musculus OX=10090 GN=Fhit PE=1 SV=1	7.31	24.5	4.69484	1	1	0	0.125	-2	-0.0078125	2	0.0078125
E9Q1T6	Low density lipoprotein receptor-related protein 3 OS=Mus musculus OX=10090 GN=Lrp3 PE=4 SV=1	5.53	85	3.5443	1	1	0	0.125	-2	-0.0078125	2	0.0078125
E9Q2M9	WD repeat- and FYVE domain-containing protein 4 OS=Mus musculus OX=10090 GN=Wdfy4 PE=1 SV=2	6.34	354.1	1.72793	2	2	0	0.125	-2	-0.0078125	2	0.0078125
E9Q3K3	Arf-GAP with GTPase, ANK repeat and PH domain-containing protein 1 OS=Mus musculus OX=10090 GN=Agap1 PE=1 SV=3	8.46	115.7	0.662879	2	1	0	0.125	-2	-0.0078125	2	0.0078125
E9Q4Y4	Centrosomal protein 192 OS=Mus musculus OX=10090 GN=Cep192 PE=1 SV=1	5.53	276.2	1.31265	1	1	0	0.125	-2	-0.0078125	2	0.0078125
E9Q6R7	Utrophin OS=Mus musculus OX=10090 GN=Utrn PE=1 SV=1	5.33	392.5	0.962099	2	2	0	0.125	-2	-0.0078125	2	0.0078125
E9Q720	Regulator of G-protein-signaling 20 OS=Mus musculus OX=10090 GN=Rgs20 PE=1 SV=1	5.26	41.6	5.64516	1	1	0	0.125	-2	-0.0078125	2	0.0078125
E9Q7N8	Zinc finger protein 346 OS=Mus musculus OX=10090 GN=Zfp346 PE=1 SV=1	8.95	34.3	17.7994	1	1	0	0.125	-2	-0.0078125	2	0.0078125
E9Q7P1	Collagen, type XXII, alpha 1 OS=Mus musculus OX=10090 GN=Col22a1 PE=1 SV=1	7.21	159.8	0.743955	1	2	0	0.125	-2	-0.0078125	2	0.0078125
E9Q7P9	Cadherin-related family member 2 OS=Mus musculus OX=10090 GN=Cdhr2 PE=1 SV=1	4.44	142.5	0.840979	1	1	0	0.125	-2	-0.0078125	2	0.0078125
E9Q7X7	Neurexin-2 OS=Mus musculus OX=10090 GN=Nrxn2 PE=1 SV=1	5.9	184.8	2.04678	1	1	0	0.125	-2	-0.0078125	2	0.0078125
E9Q827	cAMP-regulated phosphoprotein 19 OS=Mus musculus OX=10090 GN=Arpp19 PE=1 SV=1	9.76	16.1	3.44828	1	1	0	0.125	-2	-0.0078125	2	0.0078125
E9Q8T7	Dynein axonemal heavy chain 1 OS=Mus musculus OX=10090 GN=Dnah1 PE=1 SV=1	5.57	486.8	0.611765	1	1	0	0.125	-2	-0.0078125	2	0.0078125
E9Q8V1	Late cornified envelope 3D OS=Mus musculus OX=10090 GN=Lce3d PE=3 SV=1	8.72	10	26.5306	1	1	0	0.125	-2	-0.0078125	2	0.0078125
E9Q918	Multiple epidermal growth factor-like domains protein 11 OS=Mus musculus OX=10090 GN=Megf11 PE=4 SV=1	6.3	116.8	2.37443	1	1	0	0.125	-2	-0.0078125	2	0.0078125
E9Q9F7	Coiled-coil domain-containing 146 OS=Mus musculus OX=10090 GN=Ccdc146 PE=1 SV=1	6.84	115	2.35415	1	1	0	0.125	-2	-0.0078125	2	0.0078125
E9Q9K8	A kinase (PRKA) anchor protein 6 OS=Mus musculus OX=10090 GN=Akap6 PE=1 SV=1	5.06	254.2	2.12397	2	2	0	0.125	-2	-0.0078125	2	0.0078125
E9QA45	GTP-binding protein 2 OS=Mus musculus OX=10090 GN=Gtpbp2 PE=1 SV=1	7.42	65.8	4.63576	1	1	0	0.125	-2	-0.0078125	2	0.0078125
E9QAE4	Histone-lysine N-methyltransferase, H3 lysine-36-specific OS=Mus musculus OX=10090 GN=Nsd1 PE=1 SV=1	8.13	296.2	0.483092	1	1	0	0.125	-2	-0.0078125	2	0.0078125
E9QK53	Fibroblast growth factor receptor OS=Mus musculus OX=10090 GN=Fgfr2 PE=1 SV=1	5.96	94.1	1.78571	2	1	0	0.125	-2	-0.0078125	2	0.0078125
E9QKG8	Holliday junction recognition protein OS=Mus musculus OX=10090 GN=Hjurp PE=1 SV=1	9.32	74.1	1.7991	1	1	0	0.125	-2	-0.0078125	2	0.0078125
E9QKL0	Helicase ARIP4 OS=Mus musculus OX=10090 GN=Rad54l2 PE=1 SV=1	6.09	162.5	1.36333	2	1	0	0.125	-2	-0.0078125	2	0.0078125
E9QL29	Protein fuzzy homolog OS=Mus musculus OX=10090 GN=Fuz PE=3 SV=1	6.46	45.5	10.3614	1	1	0	0.125	-2	-0.0078125	2	0.0078125
E9QLR9	DNA damage-induced apoptosis suppressor protein OS=Mus musculus OX=10090 GN=Ddias PE=4 SV=1	7.08	100.1	1.33482	1	1	0	0.125	-2	-0.0078125	2	0.0078125
E9QMJ8	Axin-1 OS=Mus musculus OX=10090 GN=Axin1 PE=1 SV=1	6.93	96.8	2.88018	1	1	0	0.125	-2	-0.0078125	2	0.0078125
E9QP68	Protein FAM189A2 OS=Mus musculus OX=10090 GN=Fam189a2 PE=1 SV=1	7.99	64.2	7.71812	1	1	0	0.125	-2	-0.0078125	2	0.0078125
E9QQ25	Striated muscle-specific serine/threonine-protein kinase OS=Mus musculus OX=10090 GN=Speg PE=1 SV=1	8.18	354.1	0.459841	1	1	0	0.125	-2	-0.0078125	2	0.0078125
F2Z429	Tudor domain-containing protein 6 OS=Mus musculus OX=10090 GN=Tdrd6 PE=1 SV=2	5.35	237.9	0.936768	2	1	0	0.125	-2	-0.0078125	2	0.0078125
F6QRE9	Glutamate-rich 3 OS=Mus musculus OX=10090 GN=Erich3 PE=1 SV=3	4.84	180	1.16066	1	1	0	0.125	-2	-0.0078125	2	0.0078125
F6QTX1	Zinc finger protein 688 (Fragment) OS=Mus musculus OX=10090 GN=Zfp688 PE=1 SV=1	7.34	12.3	18.5841	1	1	0	0.125	-2	-0.0078125	2	0.0078125
F6R2Z5	Ras-related protein Rab-11A (Fragment) OS=Mus musculus OX=10090 GN=Rab11a PE=4 SV=1	5.83	9.6	14.9425	3	1	0	0.125	-2	-0.0078125	2	0.0078125
F6RXI4	Chondroitin sulfate proteoglycan 4B OS=Mus musculus OX=10090 GN=Cspg4b PE=4 SV=2	6.52	265.6	0.292765	1	1	0	0.125	-2	-0.0078125	2	0.0078125
F6TZU3	Gigaxonin (Fragment) OS=Mus musculus OX=10090 GN=Gan PE=1 SV=1	5.92	67.6	3.35008	1	1	0	0.125	-2	-0.0078125	2	0.0078125
F6URK1	Centrosomal protein of 295 kDa (Fragment) OS=Mus musculus OX=10090 GN=Cep295 PE=4 SV=1	4.5	12.6	9.90991	1	1	0	0.125	-2	-0.0078125	2	0.0078125
F6VNP0	S-adenosyl-L-methionine-dependent tRNA 4-demethylwyosine synthase TYW1 (Fragment) OS=Mus musculus OX=10090 GN=Tyw1 PE=1 SV=2	8.9	25.6	11.1111	1	1	0	0.125	-2	-0.0078125	2	0.0078125
F6WBP1	NEDD4-binding protein 2-like 2 (Fragment) OS=Mus musculus OX=10090 GN=N4bp2l2 PE=1 SV=1	7.31	16.1	3.62319	1	1	0	0.125	-2	-0.0078125	2	0.0078125
F6YCH1	Wings apart-like protein homolog (Fragment) OS=Mus musculus OX=10090 GN=Wapl PE=1 SV=1	5.02	48.7	11.1628	1	1	0	0.125	-2	-0.0078125	2	0.0078125
F7A4A7	Otogelin-like protein OS=Mus musculus OX=10090 GN=Otogl PE=1 SV=1	5.11	260.8	4.86022	4	4	0	0.125	-2	-0.0078125	2	0.0078125
F7BE84	Ankyrin repeat domain 50 (Fragment) OS=Mus musculus OX=10090 GN=Ankrd50 PE=1 SV=1	6.47	150.8	1.94245	1	1	0	0.125	-2	-0.0078125	2	0.0078125
F7BWT7	Tetraspanin-15 OS=Mus musculus OX=10090 GN=Tspan15 PE=1 SV=2	5.97	33	11.2245	1	1	0	0.125	-2	-0.0078125	2	0.0078125
F7C1U0	Potassium channel tetramerisation domain-containing 17 (Fragment) OS=Mus musculus OX=10090 GN=Kctd17 PE=1 SV=1	5.17	23.8	14.7619	1	1	0	0.125	-2	-0.0078125	2	0.0078125
F7D291	Protein MTSS 2 (Fragment) OS=Mus musculus OX=10090 GN=Mtss2 PE=1 SV=1	8	39.1	3.84615	1	1	0	0.125	-2	-0.0078125	2	0.0078125
F8VPN4	Glycogen debrancher OS=Mus musculus OX=10090 GN=Agl PE=1 SV=1	6.74	174.2	0.78329	1	1	0	0.125	-2	-0.0078125	2	0.0078125
F8VPU0	Transcriptional enhancer factor TEF-5 OS=Mus musculus OX=10090 GN=Tead3 PE=1 SV=1	8.72	51.4	6.23656	1	1	0	0.125	-2	-0.0078125	2	0.0078125
F8VQB1	Olfactory receptor OS=Mus musculus OX=10090 GN=Olfr417 PE=3 SV=1	8.75	34.6	8.73786	1	1	0	0.125	-2	-0.0078125	2	0.0078125
F8WHU5	Sister chromatid cohesion protein PDS5 homolog B OS=Mus musculus OX=10090 GN=Pds5b PE=1 SV=1	8.54	164.7	0.759144	2	1	0	0.125	-2	-0.0078125	2	0.0078125
F8WI37	[Histone H3]-lysine(4) N-methyltransferase OS=Mus musculus OX=10090 GN=Kmt2c PE=1 SV=1	6.55	539.9	0.815661	2	1	0	0.125	-2	-0.0078125	2	0.0078125
F8WID5	Tropomyosin alpha-1 chain OS=Mus musculus OX=10090 GN=Tpm1 PE=1 SV=1	4.72	37.4	3.06748	1	1	0	0.125	-2	-0.0078125	2	0.0078125
G3UWG2	Rho guanine nucleotide exchange factor TIAM1 OS=Mus musculus OX=10090 GN=Tiam1 PE=1 SV=1	6.64	177.3	1.19422	1	1	0	0.125	-2	-0.0078125	2	0.0078125
G3UYN0	L1TD1 OS=Mus musculus OX=10090 GN=L1td1 PE=1 SV=1	5.05	95.4	4.95283	7	3	0	0.125	-2	-0.0078125	2	0.0078125
G3X8Y3	N-alpha-acetyltransferase 15, NatA auxiliary subunit OS=Mus musculus OX=10090 GN=Naa15 PE=1 SV=1	7.52	101	1.50289	1	1	0	0.125	-2	-0.0078125	2	0.0078125
G3X907	Teneurin-3 OS=Mus musculus OX=10090 GN=Tenm3 PE=1 SV=1	6.51	302.8	0.957643	1	1	0	0.125	-2	-0.0078125	2	0.0078125
G3X952	Zinc finger with KRAB and SCAN domains 2 OS=Mus musculus OX=10090 GN=Zkscan2 PE=1 SV=1	7.85	110.4	2.08333	3	1	0	0.125	-2	-0.0078125	2	0.0078125
G3X964	RIKEN cDNA 2610008E11 gene OS=Mus musculus OX=10090 GN=2610008E11Rik PE=4 SV=1	7.8	80.2	4.18535	1	1	0	0.125	-2	-0.0078125	2	0.0078125
G5E8L9	Maestro heat-like repeat family member 9 OS=Mus musculus OX=10090 GN=Mroh9 PE=4 SV=1	7.44	101.6	1.23457	1	1	0	0.125	-2	-0.0078125	2	0.0078125
G5E8P0	Gamma-tubulin complex component 6 OS=Mus musculus OX=10090 GN=Tubgcp6 PE=1 SV=1	5.95	197.1	0.226116	1	1	0	0.125	-2	-0.0078125	2	0.0078125
G5E8P2	Rho guanine nucleotide exchange factor 28 OS=Mus musculus OX=10090 GN=Arhgef28 PE=1 SV=1	5.73	190.4	0.588235	1	1	0	0.125	-2	-0.0078125	2	0.0078125
G5E8U1	Sulfate anion transporter 1 OS=Mus musculus OX=10090 GN=Slc26a1 PE=1 SV=1	8.07	77.6	5.55556	1	1	0	0.125	-2	-0.0078125	2	0.0078125
G5E8Z3	RIKEN cDNA 2310050C09 gene OS=Mus musculus OX=10090 GN=2310050C09Rik PE=1 SV=1	8.02	29.1	4.64286	1	1	0	0.125	-2	-0.0078125	2	0.0078125
H3BJT4	POU domain protein OS=Mus musculus OX=10090 GN=Pou2f3 PE=3 SV=1	8.68	46.9	2.78422	1	1	0	0.125	-2	-0.0078125	2	0.0078125
H7BX78	Zinc finger protein 408 OS=Mus musculus OX=10090 GN=Zfp408 PE=4 SV=1	6.93	77.8	4.78873	1	1	0	0.125	-2	-0.0078125	2	0.0078125
H9KV15	Protein SON OS=Mus musculus OX=10090 GN=Son PE=1 SV=1	5.4	253.9	1.10969	2	2	0	0.125	-2	-0.0078125	2	0.0078125
I7HPW3	Centrosomal protein of 112 kDa (Fragment) OS=Mus musculus OX=10090 GN=Cep112 PE=1 SV=9	6.55	26.5	1.77778	1	1	0	0.125	-2	-0.0078125	2	0.0078125
J3KMQ6	RIKEN cDNA 5730455P16 gene OS=Mus musculus OX=10090 GN=5730455P16Rik PE=1 SV=1	5.05	44.4	1.01781	1	1	0	0.125	-2	-0.0078125	2	0.0078125
J3QN52	PRAME-like 33 OS=Mus musculus OX=10090 GN=Pramel33 PE=3 SV=1	8.69	55.2	1.0352	1	1	0	0.125	-2	-0.0078125	2	0.0078125
J3QPC5	Zinc finger protein 850 OS=Mus musculus OX=10090 GN=Zfp850 PE=4 SV=1	8.92	80.2	3.91872	1	1	0	0.125	-2	-0.0078125	2	0.0078125
J3QPS1	Predicted gene 10717 OS=Mus musculus OX=10090 GN=Gm10717 PE=4 SV=1	8.38	26.5	27.2321	1	1	0	0.125	-2	-0.0078125	2	0.0078125
K3W4P1	Next to BRCA1 gene 1 protein OS=Mus musculus OX=10090 GN=Nbr1 PE=1 SV=1	5.1	110	3.64372	1	1	0	0.125	-2	-0.0078125	2	0.0078125
L7N480	Family with sequence similarity 71, member E2 OS=Mus musculus OX=10090 GN=Fam71e2 PE=4 SV=2	9.6	83.7	3.0504	2	2	0	0.125	-2	-0.0078125	2	0.0078125
M0QWR8	Solute carrier organic anion transporter family member OS=Mus musculus OX=10090 GN=Gm6614 PE=3 SV=1	6.46	73.8	4.1791	1	1	0	0.125	-2	-0.0078125	2	0.0078125
O35185	Class E basic helix-loop-helix protein 40 OS=Mus musculus OX=10090 GN=Bhlhe40 PE=1 SV=1	7.97	45.3	4.37956	1	1	0	0.125	-2	-0.0078125	2	0.0078125
O35239	Tyrosine-protein phosphatase non-receptor type 9 OS=Mus musculus OX=10090 GN=Ptpn9 PE=1 SV=2	8.1	67.9	1.85497	1	1	0	0.125	-2	-0.0078125	2	0.0078125
O35242	Protein FAN OS=Mus musculus OX=10090 GN=Nsmaf PE=1 SV=2	5.91	104.5	2.93478	1	1	0	0.125	-2	-0.0078125	2	0.0078125
O35435	Dihydroorotate dehydrogenase (quinone), mitochondrial OS=Mus musculus OX=10090 GN=Dhodh PE=1 SV=2	9.55	42.7	1.77215	1	1	0	0.125	-2	-0.0078125	2	0.0078125
O54834	Rho GTPase-activating protein 6 OS=Mus musculus OX=10090 GN=Arhgap6 PE=1 SV=3	8.28	108.8	4.96454	1	1	0	0.125	-2	-0.0078125	2	0.0078125
O54839	Eomesodermin homolog OS=Mus musculus OX=10090 GN=Eomes PE=1 SV=3	7.52	74.8	1.69731	1	1	0	0.125	-2	-0.0078125	2	0.0078125
O54879	High mobility group protein B3 OS=Mus musculus OX=10090 GN=Hmgb3 PE=1 SV=3	8.37	23	6	3	1	0	0.125	-2	-0.0078125	2	0.0078125
O55017	Voltage-dependent N-type calcium channel subunit alpha-1B OS=Mus musculus OX=10090 GN=Cacna1b PE=1 SV=1	8.59	261.3	0.515685	1	1	0	0.125	-2	-0.0078125	2	0.0078125
O70439	Syntaxin-7 OS=Mus musculus OX=10090 GN=Stx7 PE=1 SV=3	5.78	29.8	9.57854	1	1	0	0.125	-2	-0.0078125	2	0.0078125
O70479	BTB/POZ domain-containing adapter for CUL3-mediated RhoA degradation protein 2 OS=Mus musculus OX=10090 GN=Tnfaip1 PE=2 SV=1	7.84	36.1	5.06329	1	1	0	0.125	-2	-0.0078125	2	0.0078125
O70576	Cohesin subunit SA-3 OS=Mus musculus OX=10090 GN=Stag3 PE=1 SV=2	6.29	141.1	2.74194	1	1	0	0.125	-2	-0.0078125	2	0.0078125
O70589	Peripheral plasma membrane protein CASK OS=Mus musculus OX=10090 GN=Cask PE=1 SV=2	6.43	105	4.85961	2	2	0	0.125	-2	-0.0078125	2	0.0078125
O88554	Poly [ADP-ribose] polymerase 2 OS=Mus musculus OX=10090 GN=Parp2 PE=1 SV=3	8.43	63.4	7.15564	2	2	0	0.125	-2	-0.0078125	2	0.0078125
O88853	Galanin receptor type 3 OS=Mus musculus OX=10090 GN=Galr3 PE=2 SV=2	10.05	40.4	7.02703	1	1	0	0.125	-2	-0.0078125	2	0.0078125
O88888	Amyloid-beta A4 precursor protein-binding family A member 3 OS=Mus musculus OX=10090 GN=Apba3 PE=1 SV=1	5.08	60.7	6.65499	2	2	0	0.125	-2	-0.0078125	2	0.0078125
O88907	E3 SUMO-protein ligase PIAS1 OS=Mus musculus OX=10090 GN=Pias1 PE=1 SV=2	7.28	71.6	1.07527	2	1	0	0.125	-2	-0.0078125	2	0.0078125
O88962	7-alpha-hydroxycholest-4-en-3-one 12-alpha-hydroxylase OS=Mus musculus OX=10090 GN=Cyp8b1 PE=1 SV=1	8.84	57.7	2.6	3	1	0	0.125	-2	-0.0078125	2	0.0078125
O88987	A-kinase anchor protein 3 OS=Mus musculus OX=10090 GN=Akap3 PE=1 SV=2	6.3	95.5	4.86111	1	1	0	0.125	-2	-0.0078125	2	0.0078125
P00375	Dihydrofolate reductase OS=Mus musculus OX=10090 GN=Dhfr PE=1 SV=3	8.53	21.6	10.6952	1	1	0	0.125	-2	-0.0078125	2	0.0078125
P02831	Homeobox protein Hox-A3 OS=Mus musculus OX=10090 GN=Hoxa3 PE=1 SV=2	9.23	46.4	5.64334	2	1	0	0.125	-2	-0.0078125	2	0.0078125
P03977	Ig kappa chain V-III region 50S10.1 OS=Mus musculus OX=10090 PE=1 SV=1	5.06	12	22.5225	1	1	0	0.125	-2	-0.0078125	2	0.0078125
P06880	Somatotropin OS=Mus musculus OX=10090 GN=Gh1 PE=2 SV=1	6.34	24.7	11.5741	1	1	0	0.125	-2	-0.0078125	2	0.0078125
P0C090	Roquin-2 OS=Mus musculus OX=10090 GN=Rc3h2 PE=1 SV=1	6.95	131.2	1.43218	1	1	0	0.125	-2	-0.0078125	2	0.0078125
P0C8K7	Small integral membrane protein 1 OS=Mus musculus OX=10090 GN=Smim1 PE=1 SV=1	8.66	8.8	23.0769	1	1	0	0.125	-2	-0.0078125	2	0.0078125
P10628	Homeobox protein Hox-D4 OS=Mus musculus OX=10090 GN=Hoxd4 PE=1 SV=3	9.5	27.4	4.4	3	1	0	0.125	-2	-0.0078125	2	0.0078125
P10639	Thioredoxin OS=Mus musculus OX=10090 GN=Txn PE=1 SV=3	4.92	11.7	12.381	16	1	0	0.125	-2	-0.0078125	2	0.0078125
P10889	C-X-C motif chemokine 2 OS=Mus musculus OX=10090 GN=Cxcl2 PE=1 SV=2	9.14	10.6	35	1	1	0	0.125	-2	-0.0078125	2	0.0078125
P11835	Integrin beta-2 OS=Mus musculus OX=10090 GN=Itgb2 PE=1 SV=2	7.12	85	5.05837	2	2	0	0.125	-2	-0.0078125	2	0.0078125
P12710	Fatty acid-binding protein, liver OS=Mus musculus OX=10090 GN=Fabp1 PE=1 SV=2	8.56	14.2	4.72441	1	1	0	0.125	-2	-0.0078125	2	0.0078125
P13379	T-cell surface glycoprotein CD5 OS=Mus musculus OX=10090 GN=Cd5 PE=1 SV=1	8.21	53.8	9.91903	2	2	0	0.125	-2	-0.0078125	2	0.0078125
P14069	Protein S100-A6 OS=Mus musculus OX=10090 GN=S100a6 PE=1 SV=3	5.48	10	8.98876	1	1	0	0.125	-2	-0.0078125	2	0.0078125
P14206	40S ribosomal protein SA OS=Mus musculus OX=10090 GN=Rpsa PE=1 SV=4	4.87	32.8	4.40678	3	1	0	0.125	-2	-0.0078125	2	0.0078125
P15261	Interferon gamma receptor 1 OS=Mus musculus OX=10090 GN=Ifngr1 PE=1 SV=3	5.53	52.3	8.80503	1	1	0	0.125	-2	-0.0078125	2	0.0078125
P15265	Sperm mitochondrial-associated cysteine-rich protein OS=Mus musculus OX=10090 GN=Smcp PE=2 SV=4	8.1	14.9	15.3846	1	1	0	0.125	-2	-0.0078125	2	0.0078125
P15655	Fibroblast growth factor 2 OS=Mus musculus OX=10090 GN=Fgf2 PE=1 SV=1	9.52	17.1	6.49351	1	1	0	0.125	-2	-0.0078125	2	0.0078125
P16015	Carbonic anhydrase 3 OS=Mus musculus OX=10090 GN=Ca3 PE=1 SV=3	7.37	29.3	14.2308	1	1	0	0.125	-2	-0.0078125	2	0.0078125
P21275	Bone morphogenetic protein 4 OS=Mus musculus OX=10090 GN=Bmp4 PE=1 SV=2	8.16	46.5	6.86275	1	1	0	0.125	-2	-0.0078125	2	0.0078125
P27512	Tumor necrosis factor receptor superfamily member 5 OS=Mus musculus OX=10090 GN=Cd40 PE=1 SV=3	6.74	32.1	19.3772	1	1	0	0.125	-2	-0.0078125	2	0.0078125
P29477	Nitric oxide synthase, inducible OS=Mus musculus OX=10090 GN=Nos2 PE=1 SV=1	7.72	130.5	2.44755	1	1	0	0.125	-2	-0.0078125	2	0.0078125
P35378	Follicle-stimulating hormone receptor OS=Mus musculus OX=10090 GN=Fshr PE=2 SV=2	7.01	77.7	3.75723	1	1	0	0.125	-2	-0.0078125	2	0.0078125
P35486	Pyruvate dehydrogenase E1 component subunit alpha, somatic form, mitochondrial OS=Mus musculus OX=10090 GN=Pdha1 PE=1 SV=1	8.19	43.2	3.33333	1	1	0	0.125	-2	-0.0078125	2	0.0078125
P36895	Bone morphogenetic protein receptor type-1A OS=Mus musculus OX=10090 GN=Bmpr1a PE=1 SV=1	7.3	60	7.89474	1	1	0	0.125	-2	-0.0078125	2	0.0078125
P37889	Fibulin-2 OS=Mus musculus OX=10090 GN=Fbln2 PE=1 SV=2	4.68	131.7	3.1941	1	1	0	0.125	-2	-0.0078125	2	0.0078125
P39429	TNF receptor-associated factor 2 OS=Mus musculus OX=10090 GN=Traf2 PE=1 SV=1	6.96	56	7.38523	1	1	0	0.125	-2	-0.0078125	2	0.0078125
P39654	Polyunsaturated fatty acid lipoxygenase ALOX15 OS=Mus musculus OX=10090 GN=Alox15 PE=1 SV=4	6.11	75.4	10.7089	2	2	0	0.125	-2	-0.0078125	2	0.0078125
P41588	Vasoactive intestinal polypeptide receptor 2 OS=Mus musculus OX=10090 GN=Vipr2 PE=1 SV=1	7.61	49.4	8.23799	1	1	0	0.125	-2	-0.0078125	2	0.0078125
P47934	Carnitine O-acetyltransferase OS=Mus musculus OX=10090 GN=Crat PE=1 SV=3	8.44	70.8	2.8754	1	1	0	0.125	-2	-0.0078125	2	0.0078125
P47964	60S ribosomal protein L36 OS=Mus musculus OX=10090 GN=Rpl36 PE=1 SV=2	11.34	12.2	8.57143	1	1	0	0.125	-2	-0.0078125	2	0.0078125
P48787	Troponin I, cardiac muscle OS=Mus musculus OX=10090 GN=Tnni3 PE=1 SV=2	9.55	24.2	9.00474	1	1	0	0.125	-2	-0.0078125	2	0.0078125
P49443	Protein phosphatase 1A OS=Mus musculus OX=10090 GN=Ppm1a PE=1 SV=1	5.36	42.4	2.87958	1	1	0	0.125	-2	-0.0078125	2	0.0078125
P50114	Protein S100-B OS=Mus musculus OX=10090 GN=S100b PE=1 SV=2	4.55	10.7	39.1304	1	1	0	0.125	-2	-0.0078125	2	0.0078125
P51827	AF4/FMR2 family member 3 OS=Mus musculus OX=10090 GN=Aff3 PE=1 SV=2	8.15	136	2.07337	1	1	0	0.125	-2	-0.0078125	2	0.0078125
P51944	Cyclin-F OS=Mus musculus OX=10090 GN=Ccnf PE=2 SV=2	7.33	86.6	5.92021	2	2	0	0.125	-2	-0.0078125	2	0.0078125
P54754	Ephrin type-B receptor 3 OS=Mus musculus OX=10090 GN=Ephb3 PE=1 SV=2	6.28	109.6	1.00705	1	1	0	0.125	-2	-0.0078125	2	0.0078125
P54775	26S proteasome regulatory subunit 6B OS=Mus musculus OX=10090 GN=Psmc4 PE=1 SV=2	5.21	47.4	8.61244	2	2	0	0.125	-2	-0.0078125	2	0.0078125
P54923	ADP-ribosylhydrolase ARH1 OS=Mus musculus OX=10090 GN=Adprh PE=1 SV=1	5.76	40	4.97238	1	1	0	0.125	-2	-0.0078125	2	0.0078125
P56399	Ubiquitin carboxyl-terminal hydrolase 5 OS=Mus musculus OX=10090 GN=Usp5 PE=1 SV=1	5.01	95.8	3.0303	1	1	0	0.125	-2	-0.0078125	2	0.0078125
P56546	C-terminal-binding protein 2 OS=Mus musculus OX=10090 GN=Ctbp2 PE=1 SV=2	6.95	48.9	1.79775	3	1	0	0.125	-2	-0.0078125	2	0.0078125
P56726	Smoothened homolog OS=Mus musculus OX=10090 GN=Smo PE=1 SV=2	8.44	87.4	3.40479	1	1	0	0.125	-2	-0.0078125	2	0.0078125
P58308	Orexin receptor type 2 OS=Mus musculus OX=10090 GN=Hcrtr2 PE=2 SV=2	8.78	52.4	14.1304	2	2	0	0.125	-2	-0.0078125	2	0.0078125
P59053	Potassium voltage-gated channel subfamily G member 3 OS=Mus musculus OX=10090 GN=Kcng3 PE=2 SV=1	8.35	49.2	6.23557	1	1	0	0.125	-2	-0.0078125	2	0.0078125
P59114	mRNA (2'-O-methyladenosine-N(6)-)-methyltransferase OS=Mus musculus OX=10090 GN=Pcif1 PE=1 SV=1	7.64	80.5	2.40793	1	1	0	0.125	-2	-0.0078125	2	0.0078125
P59729	Ras and Rab interactor 3 OS=Mus musculus OX=10090 GN=Rin3 PE=1 SV=2	7.23	107.2	2.7551	1	1	0	0.125	-2	-0.0078125	2	0.0078125
P61219	DNA-directed RNA polymerases I, II, and III subunit RPABC2 OS=Mus musculus OX=10090 GN=Polr2f PE=2 SV=1	4.22	14.5	22.8346	1	1	0	0.125	-2	-0.0078125	2	0.0078125
P61222	ATP-binding cassette sub-family E member 1 OS=Mus musculus OX=10090 GN=Abce1 PE=1 SV=1	8.34	67.3	0.834725	1	1	0	0.125	-2	-0.0078125	2	0.0078125
P63037	DnaJ homolog subfamily A member 1 OS=Mus musculus OX=10090 GN=Dnaja1 PE=1 SV=1	7.08	44.8	2.01511	1	1	0	0.125	-2	-0.0078125	2	0.0078125
P63154	Crooked neck-like protein 1 OS=Mus musculus OX=10090 GN=Crnkl1 PE=1 SV=1	6.93	83.4	3.47826	1	1	0	0.125	-2	-0.0078125	2	0.0078125
P63328	Serine/threonine-protein phosphatase 2B catalytic subunit alpha isoform OS=Mus musculus OX=10090 GN=Ppp3ca PE=1 SV=1	5.86	58.6	1.53551	1	1	0	0.125	-2	-0.0078125	2	0.0078125
P70313	Nitric oxide synthase, endothelial OS=Mus musculus OX=10090 GN=Nos3 PE=1 SV=4	7.02	132.8	1.91348	1	1	0	0.125	-2	-0.0078125	2	0.0078125
P70326	T-box transcription factor TBX5 OS=Mus musculus OX=10090 GN=Tbx5 PE=1 SV=2	7.81	57.8	4.44015	1	1	0	0.125	-2	-0.0078125	2	0.0078125
P70671	Interferon regulatory factor 3 OS=Mus musculus OX=10090 GN=Irf3 PE=1 SV=1	5.43	46.8	6.68258	1	1	0	0.125	-2	-0.0078125	2	0.0078125
P84086	Complexin-2 OS=Mus musculus OX=10090 GN=Cplx2 PE=1 SV=1	5.08	15.4	29.8507	5	3	0	0.125	-2	-0.0078125	2	0.0078125
P97313	DNA-dependent protein kinase catalytic subunit OS=Mus musculus OX=10090 GN=Prkdc PE=1 SV=3	7.12	471.2	0.629845	1	1	0	0.125	-2	-0.0078125	2	0.0078125
P97321	Prolyl endopeptidase FAP OS=Mus musculus OX=10090 GN=Fap PE=1 SV=1	7.08	87.9	3.28515	1	1	0	0.125	-2	-0.0078125	2	0.0078125
P98084	Amyloid-beta A4 precursor protein-binding family A member 2 OS=Mus musculus OX=10090 GN=Apba2 PE=1 SV=2	4.88	82.7	5.6	1	1	0	0.125	-2	-0.0078125	2	0.0078125
P98197	Phospholipid-transporting ATPase IH OS=Mus musculus OX=10090 GN=Atp11a PE=1 SV=1	6.48	135.4	3.36984	1	1	0	0.125	-2	-0.0078125	2	0.0078125
Q00262	Syntaxin-2 OS=Mus musculus OX=10090 GN=Stx2 PE=1 SV=1	6.39	33.2	8.3045	1	1	0	0.125	-2	-0.0078125	2	0.0078125
Q00420	GA-binding protein subunit beta-1 OS=Mus musculus OX=10090 GN=Gabpb1 PE=1 SV=2	4.84	41.3	1.82768	1	1	0	0.125	-2	-0.0078125	2	0.0078125
Q03719	Potassium voltage-gated channel subfamily D member 1 OS=Mus musculus OX=10090 GN=Kcnd1 PE=1 SV=1	8.21	71.7	0.614439	1	1	0	0.125	-2	-0.0078125	2	0.0078125
Q059V1	Hepatocyte nuclear factor 4, gamma OS=Mus musculus OX=10090 GN=Hnf4g PE=1 SV=1	8	46.9	6.69856	1	1	0	0.125	-2	-0.0078125	2	0.0078125
Q05D44	Eukaryotic translation initiation factor 5B OS=Mus musculus OX=10090 GN=Eif5b PE=1 SV=2	5.59	137.5	2.30263	1	1	0	0.125	-2	-0.0078125	2	0.0078125
Q07231	Zinc finger and SCAN domain-containing protein 21 OS=Mus musculus OX=10090 GN=Zscan21 PE=2 SV=2	7.17	63	5.58559	2	2	0	0.125	-2	-0.0078125	2	0.0078125
Q07456	Protein AMBP OS=Mus musculus OX=10090 GN=Ambp PE=1 SV=2	6.32	39	15.7593	1	1	0	0.125	-2	-0.0078125	2	0.0078125
Q3KR45	DNA (cytosine-5-)-methyltransferase OS=Mus musculus OX=10090 GN=Dnmt3b PE=1 SV=1	8.31	97.3	2.67442	1	1	0	0.125	-2	-0.0078125	2	0.0078125
Q3T9X0	Solute carrier family 2, facilitated glucose transporter member 9 OS=Mus musculus OX=10090 GN=Slc2a9 PE=1 SV=1	8.07	58.6	1.11524	1	1	0	0.125	-2	-0.0078125	2	0.0078125
Q3TTE0	Disintegrin and metalloproteinase domain-containing protein 5 OS=Mus musculus OX=10090 GN=Adam5 PE=1 SV=1	7.01	84.5	3.46205	1	1	0	0.125	-2	-0.0078125	2	0.0078125
Q3TZL0	Envelope polyprotein OS=Mus musculus OX=10090 GN=Gm14226 PE=2 SV=1	8.06	76.3	4.51895	1	1	0	0.125	-2	-0.0078125	2	0.0078125
Q3U132	Protein TESPA1 OS=Mus musculus OX=10090 GN=Tespa1 PE=1 SV=1	5.78	51.7	6.33188	1	1	0	0.125	-2	-0.0078125	2	0.0078125
Q3U1J0	Sodium-coupled neutral amino acid transporter 5 OS=Mus musculus OX=10090 GN=Slc38a5 PE=1 SV=1	7.59	52.6	11.4823	3	2	0	0.125	-2	-0.0078125	2	0.0078125
Q3U214	Microtubule-associated serine/threonine-protein kinase 3 OS=Mus musculus OX=10090 GN=Mast3 PE=1 SV=3	8.44	144.1	2.34671	2	2	0	0.125	-2	-0.0078125	2	0.0078125
Q3U9N9	Monocarboxylate transporter 10 OS=Mus musculus OX=10090 GN=Slc16a10 PE=1 SV=1	8.06	55.3	1.75781	1	1	0	0.125	-2	-0.0078125	2	0.0078125
Q3UH63	Scm-like with four MBT domains protein 2 OS=Mus musculus OX=10090 GN=Sfmbt2 PE=1 SV=1	8.35	109.9	0.923077	1	1	0	0.125	-2	-0.0078125	2	0.0078125
Q3UHK6	Teneurin-4 OS=Mus musculus OX=10090 GN=Tenm4 PE=1 SV=2	6.57	308.2	0.721761	1	1	0	0.125	-2	-0.0078125	2	0.0078125
Q3UIU2	NADH dehydrogenase [ubiquinone] 1 beta subcomplex subunit 6 OS=Mus musculus OX=10090 GN=Ndufb6 PE=1 SV=3	9.79	15.5	5.46875	1	1	0	0.125	-2	-0.0078125	2	0.0078125
Q3ULF4	Paraplegin OS=Mus musculus OX=10090 GN=Spg7 PE=1 SV=1	9.04	85.9	1.02433	1	1	0	0.125	-2	-0.0078125	2	0.0078125
Q3UTC9	Protein Mdm4 OS=Mus musculus OX=10090 GN=Mdm4 PE=1 SV=1	5.35	55.1	2.04082	2	1	0	0.125	-2	-0.0078125	2	0.0078125
Q3UTM5	Regulator of G-protein-signaling 6 OS=Mus musculus OX=10090 GN=Rgs6 PE=1 SV=1	6.44	42.3	1.08696	1	1	0	0.125	-2	-0.0078125	2	0.0078125
Q3UUF8	Ankyrin repeat domain-containing protein 34B OS=Mus musculus OX=10090 GN=Ankrd34b PE=1 SV=1	8.02	55.4	2.95276	1	1	0	0.125	-2	-0.0078125	2	0.0078125
Q3UVL4	Vacuolar protein sorting-associated protein 51 homolog OS=Mus musculus OX=10090 GN=Vps51 PE=1 SV=2	6.24	86.1	3.45269	1	1	0	0.125	-2	-0.0078125	2	0.0078125
Q3UW41	Protein WFDC9 OS=Mus musculus OX=10090 GN=Wfdc9 PE=3 SV=1	7.58	9.6	34.9398	1	1	0	0.125	-2	-0.0078125	2	0.0078125
Q3UX43	Ankyrin repeat domain-containing protein 13C OS=Mus musculus OX=10090 GN=Ankrd13c PE=1 SV=2	6.9	60.1	4.99076	2	1	0	0.125	-2	-0.0078125	2	0.0078125
Q3UXZ1	Suppressor of cytokine-signaling 5 (Fragment) OS=Mus musculus OX=10090 GN=Socs5 PE=1 SV=1	10.04	22.8	1.97044	1	1	0	0.125	-2	-0.0078125	2	0.0078125
Q3V0P1	CPX chromosomal region candidate gene 1 protein homolog OS=Mus musculus OX=10090 GN=Cpxcr1 PE=2 SV=2	7.24	37.7	8.07453	1	1	0	0.125	-2	-0.0078125	2	0.0078125
Q3V2G4	Small integral membrane protein 31 OS=Mus musculus OX=10090 GN=Smim31 PE=3 SV=1	6.54	8.5	12.6761	1	1	0	0.125	-2	-0.0078125	2	0.0078125
Q3V432	Predicted gene 10188 OS=Mus musculus OX=10090 GN=Gm10188 PE=2 SV=1	9.95	14.4	9.62963	1	1	0	0.125	-2	-0.0078125	2	0.0078125
Q497M3	Putative C->U-editing enzyme APOBEC-4 OS=Mus musculus OX=10090 GN=Apobec4 PE=2 SV=2	9.51	42.7	17.9144	2	2	0	0.125	-2	-0.0078125	2	0.0078125
Q4FZC9	Nesprin-3 OS=Mus musculus OX=10090 GN=Syne3 PE=1 SV=1	6.33	112	1.4359	1	1	0	0.125	-2	-0.0078125	2	0.0078125
Q4PJX1	Protein odr-4 homolog OS=Mus musculus OX=10090 GN=Odr4 PE=1 SV=2	6.14	50	5.59284	1	1	0	0.125	-2	-0.0078125	2	0.0078125
Q4QY34	Beta-defensin 50 OS=Mus musculus OX=10090 GN=Defb46 PE=2 SV=1	9.09	6.3	19.2982	1	1	0	0.125	-2	-0.0078125	2	0.0078125
Q52KG5	Kinesin-like protein KIF26A OS=Mus musculus OX=10090 GN=Kif26a PE=1 SV=2	8.68	196.2	3.0303	2	2	0	0.125	-2	-0.0078125	2	0.0078125
Q52KP5	NXPE family member 4 OS=Mus musculus OX=10090 GN=Nxpe4 PE=2 SV=1	8.79	61.5	2.94659	1	1	0	0.125	-2	-0.0078125	2	0.0078125
Q571E4	N-acetylgalactosamine-6-sulfatase OS=Mus musculus OX=10090 GN=Galns PE=1 SV=2	6.52	57.6	1.92308	1	1	0	0.125	-2	-0.0078125	2	0.0078125
Q5BKQ4	Inactive pancreatic lipase-related protein 1 OS=Mus musculus OX=10090 GN=Pnliprp1 PE=1 SV=2	6.34	52.7	2.32558	1	1	0	0.125	-2	-0.0078125	2	0.0078125
Q5EG47	5'-AMP-activated protein kinase catalytic subunit alpha-1 OS=Mus musculus OX=10090 GN=Prkaa1 PE=1 SV=2	8.12	63.9	3.57782	1	1	0	0.125	-2	-0.0078125	2	0.0078125
Q5F226	Protocadherin Fat 2 OS=Mus musculus OX=10090 GN=Fat2 PE=1 SV=1	5.12	479.8	0.988279	2	2	0	0.125	-2	-0.0078125	2	0.0078125
Q5F2E8	Serine/threonine-protein kinase TAO1 OS=Mus musculus OX=10090 GN=Taok1 PE=1 SV=1	7.55	116	1.0989	1	1	0	0.125	-2	-0.0078125	2	0.0078125
Q5R1I1	T cell receptor alpha variable 7-3 (Fragment) OS=Mus musculus OX=10090 GN=Trav7-3 PE=4 SV=1	8.03	12.5	37.5	1	1	0	0.125	-2	-0.0078125	2	0.0078125
Q5RKZ7	Molybdenum cofactor biosynthesis protein 1 OS=Mus musculus OX=10090 GN=Mocs1 PE=1 SV=2	9.14	69.8	2.04403	1	1	0	0.125	-2	-0.0078125	2	0.0078125
Q5SFM8	RNA-binding protein 27 OS=Mus musculus OX=10090 GN=Rbm27 PE=1 SV=3	9.19	118.5	2.64151	1	1	0	0.125	-2	-0.0078125	2	0.0078125
Q5SGK3	Aldehyde oxidase 2 OS=Mus musculus OX=10090 GN=Aox2 PE=1 SV=2	6.86	147.8	2.00743	2	1	0	0.125	-2	-0.0078125	2	0.0078125
Q5SQY2	Biorientation of chromosomes in cell division protein 1 OS=Mus musculus OX=10090 GN=Bod1 PE=3 SV=1	5.9	18.4	4.62428	1	1	0	0.125	-2	-0.0078125	2	0.0078125
Q5SSH8	Neuferricin OS=Mus musculus OX=10090 GN=Cyb5d2 PE=1 SV=1	7.42	29.1	7.98479	1	1	0	0.125	-2	-0.0078125	2	0.0078125
Q5SSW2	Proteasome activator complex subunit 4 OS=Mus musculus OX=10090 GN=Psme4 PE=1 SV=1	7.01	211.1	0.922409	1	1	0	0.125	-2	-0.0078125	2	0.0078125
Q5SUA5	Unconventional myosin-Ig OS=Mus musculus OX=10090 GN=Myo1g PE=1 SV=1	8.59	117.2	1.85547	1	1	0	0.125	-2	-0.0078125	2	0.0078125
Q5SZT7	NKAP-like protein OS=Mus musculus OX=10090 GN=Nkapl PE=1 SV=1	9.76	44.9	4.55696	1	1	0	0.125	-2	-0.0078125	2	0.0078125
Q5U5V2	Hydroxylysine kinase OS=Mus musculus OX=10090 GN=Hykk PE=1 SV=2	6.02	42.3	7.18085	1	1	0	0.125	-2	-0.0078125	2	0.0078125
Q60631	Growth factor receptor-bound protein 2 OS=Mus musculus OX=10090 GN=Grb2 PE=1 SV=1	6.32	25.2	10.1382	1	1	0	0.125	-2	-0.0078125	2	0.0078125
Q60662	A-kinase anchor protein 4 OS=Mus musculus OX=10090 GN=Akap4 PE=1 SV=1	6.92	93.7	6.00707	2	2	0	0.125	-2	-0.0078125	2	0.0078125
Q61026	Nuclear receptor coactivator 2 OS=Mus musculus OX=10090 GN=Ncoa2 PE=1 SV=3	6.68	158.4	1.09439	1	1	0	0.125	-2	-0.0078125	2	0.0078125
Q61036	Serine/threonine-protein kinase PAK 3 OS=Mus musculus OX=10090 GN=Pak3 PE=1 SV=2	5.4	62.4	4.65116	7	2	0	0.125	-2	-0.0078125	2	0.0078125
Q61263	Sterol O-acyltransferase 1 OS=Mus musculus OX=10090 GN=Soat1 PE=1 SV=2	9.01	63.8	2.22222	1	1	0	0.125	-2	-0.0078125	2	0.0078125
Q61423	Potassium voltage-gated channel subfamily A member 4 OS=Mus musculus OX=10090 GN=Kcna4 PE=1 SV=2	5.29	73.4	5.9633	1	1	0	0.125	-2	-0.0078125	2	0.0078125
Q61616	D(1A) dopamine receptor OS=Mus musculus OX=10090 GN=Drd1 PE=1 SV=2	6.89	49.6	6.05381	1	1	0	0.125	-2	-0.0078125	2	0.0078125
Q61626	Glutamate receptor ionotropic, kainate 5 OS=Mus musculus OX=10090 GN=Grik5 PE=2 SV=2	8.21	109.2	3.67722	2	2	0	0.125	-2	-0.0078125	2	0.0078125
Q61982	Neurogenic locus notch homolog protein 3 OS=Mus musculus OX=10090 GN=Notch3 PE=1 SV=1	5.33	244.1	1.55306	4	2	0	0.125	-2	-0.0078125	2	0.0078125
Q62018	RNA polymerase-associated protein CTR9 homolog OS=Mus musculus OX=10090 GN=Ctr9 PE=1 SV=2	6.49	133.3	0.767263	2	1	0	0.125	-2	-0.0078125	2	0.0078125
Q62288	Testican-1 OS=Mus musculus OX=10090 GN=Spock1 PE=2 SV=2	6.01	49.5	5.20362	1	1	0	0.125	-2	-0.0078125	2	0.0078125
Q62376	U1 small nuclear ribonucleoprotein 70 kDa OS=Mus musculus OX=10090 GN=Snrnp70 PE=1 SV=2	9.94	52	11.8304	1	1	0	0.125	-2	-0.0078125	2	0.0078125
Q62388	Serine-protein kinase ATM OS=Mus musculus OX=10090 GN=Atm PE=1 SV=2	6.86	349.2	2.18526	1	1	0	0.125	-2	-0.0078125	2	0.0078125
Q62513	Zinc finger protein 260 OS=Mus musculus OX=10090 GN=Znf260 PE=1 SV=1	8.84	46.4	5.40541	1	1	0	0.125	-2	-0.0078125	2	0.0078125
Q640N2	ADP-ribosylation factor-like protein 13B OS=Mus musculus OX=10090 GN=Arl13b PE=1 SV=2	6.32	48.1	3.74707	1	1	0	0.125	-2	-0.0078125	2	0.0078125
Q64279	Heart- and neural crest derivatives-expressed protein 1 OS=Mus musculus OX=10090 GN=Hand1 PE=1 SV=1	9.64	23.8	2.31481	1	1	0	0.125	-2	-0.0078125	2	0.0078125
Q66JY9	PRAME-like 20 OS=Mus musculus OX=10090 GN=Pramel20 PE=2 SV=1	7.56	54.8	8.10811	1	1	0	0.125	-2	-0.0078125	2	0.0078125
Q68SA9	A disintegrin and metalloproteinase with thrombospondin motifs 7 OS=Mus musculus OX=10090 GN=Adamts7 PE=1 SV=3	5.55	182.2	0.90525	1	1	0	0.125	-2	-0.0078125	2	0.0078125
Q69ZR2	E3 ubiquitin-protein ligase HECTD1 OS=Mus musculus OX=10090 GN=Hectd1 PE=1 SV=2	5.41	289.9	0.26738	1	1	0	0.125	-2	-0.0078125	2	0.0078125
Q69ZT1	Fanconi-associated nuclease 1 OS=Mus musculus OX=10090 GN=Fan1 PE=2 SV=2	7.44	112.9	4.5098	1	1	0	0.125	-2	-0.0078125	2	0.0078125
Q6DFY8	BMP/retinoic acid-inducible neural-specific protein 2 OS=Mus musculus OX=10090 GN=Brinp2 PE=1 SV=1	7.88	89.2	2.80971	1	1	0	0.125	-2	-0.0078125	2	0.0078125
Q6IFT4	Rho GTPase-activating protein 20 OS=Mus musculus OX=10090 GN=Arhgap20 PE=1 SV=1	7.21	131.3	3.7225	3	1	0	0.125	-2	-0.0078125	2	0.0078125
Q6NTA4	Ras-related GTP-binding protein B OS=Mus musculus OX=10090 GN=Rragb PE=1 SV=1	6.38	43.2	2.94118	1	1	0	0.125	-2	-0.0078125	2	0.0078125
Q6NZM9	Histone deacetylase 4 OS=Mus musculus OX=10090 GN=Hdac4 PE=1 SV=1	6.92	118.5	0.650558	1	1	0	0.125	-2	-0.0078125	2	0.0078125
Q6P1H7	Forkhead box M1 OS=Mus musculus OX=10090 GN=Foxm1 PE=1 SV=1	7.08	83.1	3.96301	1	1	0	0.125	-2	-0.0078125	2	0.0078125
Q6P3Y5	Zinc finger protein 280C OS=Mus musculus OX=10090 GN=Znf280c PE=1 SV=1	9.06	83.1	4.71698	1	1	0	0.125	-2	-0.0078125	2	0.0078125
Q6PAL8	DENN domain-containing protein 5A OS=Mus musculus OX=10090 GN=Dennd5a PE=1 SV=1	6.7	146.6	4.8174	2	2	0	0.125	-2	-0.0078125	2	0.0078125
Q6PDK8	E3 ubiquitin-protein ligase DTX4 OS=Mus musculus OX=10090 GN=Dtx4 PE=1 SV=2	9.63	66.8	7.14286	1	1	0	0.125	-2	-0.0078125	2	0.0078125
Q6PFX7	Neuronal tyrosine-phosphorylated phosphoinositide-3-kinase adapter 1 OS=Mus musculus OX=10090 GN=Nyap1 PE=1 SV=1	9.48	87.6	2.64106	1	1	0	0.125	-2	-0.0078125	2	0.0078125
Q6PGG2	GEM-interacting protein OS=Mus musculus OX=10090 GN=Gmip PE=1 SV=1	5.77	107.5	3.60453	2	2	0	0.125	-2	-0.0078125	2	0.0078125
Q6PGL7	WASH complex subunit 2 OS=Mus musculus OX=10090 GN=Washc2 PE=1 SV=1	4.77	145.2	3.07346	3	2	0	0.125	-2	-0.0078125	2	0.0078125
Q6V595	Kelch-like protein 6 OS=Mus musculus OX=10090 GN=Klhl6 PE=2 SV=2	6.34	70.1	2.58481	1	1	0	0.125	-2	-0.0078125	2	0.0078125
Q6XUX1	Dual serine/threonine and tyrosine protein kinase OS=Mus musculus OX=10090 GN=Dstyk PE=1 SV=1	6.58	104.8	5.82524	2	2	0	0.125	-2	-0.0078125	2	0.0078125
Q6ZWQ0	Nesprin-2 OS=Mus musculus OX=10090 GN=Syne2 PE=1 SV=2	5.33	782.2	0.712831	2	1	0	0.125	-2	-0.0078125	2	0.0078125
Q6ZWU9	40S ribosomal protein S27 OS=Mus musculus OX=10090 GN=Rps27 PE=1 SV=3	9.45	9.5	9.52381	2	1	0	0.125	-2	-0.0078125	2	0.0078125
Q76EC5	Carbohydrate sulfotransferase 9 OS=Mus musculus OX=10090 GN=Chst9 PE=2 SV=1	9.45	48	6.53753	1	1	0	0.125	-2	-0.0078125	2	0.0078125
Q7M6U3	Inactive serine/threonine-protein kinase TEX14 OS=Mus musculus OX=10090 GN=Tex14 PE=1 SV=2	5.49	162.4	3.31034	1	1	0	0.125	-2	-0.0078125	2	0.0078125
Q7M6X5	Regulator of sex-limitation candidate 18 OS=Mus musculus OX=10090 GN=Rslcan18 PE=2 SV=1	9.26	53.3	4.13043	1	1	0	0.125	-2	-0.0078125	2	0.0078125
Q7M6Z4	Kinesin-like protein KIF27 OS=Mus musculus OX=10090 GN=Kif27 PE=1 SV=1	7.14	158.9	0.71736	1	1	0	0.125	-2	-0.0078125	2	0.0078125
Q7TQA8	Taste receptor type 2 member 136 OS=Mus musculus OX=10090 GN=Tas2r136 PE=3 SV=2	9.72	35	6.55738	2	1	0	0.125	-2	-0.0078125	2	0.0078125
Q7TQG1	Pleckstrin homology domain-containing family A member 6 OS=Mus musculus OX=10090 GN=Plekha6 PE=1 SV=1	8.97	131.3	4.09207	2	2	0	0.125	-2	-0.0078125	2	0.0078125
Q7TR39	Olfactory receptor OS=Mus musculus OX=10090 GN=Olfr1140 PE=2 SV=1	6.64	35.1	8.36013	1	1	0	0.125	-2	-0.0078125	2	0.0078125
Q7TRR2	Olfactory receptor OS=Mus musculus OX=10090 GN=Olfr598 PE=3 SV=1	9.01	35.8	4.07524	1	1	0	0.125	-2	-0.0078125	2	0.0078125
Q7TSU7	Kin of IRRE-like protein 2 OS=Mus musculus OX=10090 GN=Kirrel2 PE=1 SV=1	7.18	74.5	1.57143	3	1	0	0.125	-2	-0.0078125	2	0.0078125
Q80SS6	G-protein coupled bile acid receptor 1 OS=Mus musculus OX=10090 GN=Gpbar1 PE=2 SV=1	9.55	35.6	3.34347	1	1	0	0.125	-2	-0.0078125	2	0.0078125
Q80T85	DDB1- and CUL4-associated factor 5 OS=Mus musculus OX=10090 GN=Dcaf5 PE=1 SV=2	5.8	103.6	3.17125	1	1	0	0.125	-2	-0.0078125	2	0.0078125
Q80TY4	Suppression of tumorigenicity 18 protein OS=Mus musculus OX=10090 GN=St18 PE=2 SV=2	6.44	114.7	3.73206	1	1	0	0.125	-2	-0.0078125	2	0.0078125
Q80U04	E3 ubiquitin-protein ligase Praja-2 OS=Mus musculus OX=10090 GN=Pja2 PE=1 SV=2	4.44	77.9	4.52617	1	1	0	0.125	-2	-0.0078125	2	0.0078125
Q80U44	Zinc finger FYVE domain-containing protein 16 OS=Mus musculus OX=10090 GN=Zfyve16 PE=1 SV=2	4.78	166.6	2.29058	1	1	0	0.125	-2	-0.0078125	2	0.0078125
Q80UE6	Serine/threonine-protein kinase WNK4 OS=Mus musculus OX=10090 GN=Wnk4 PE=1 SV=1	5.52	132.3	2.94599	2	2	0	0.125	-2	-0.0078125	2	0.0078125
Q80VM9	Proton channel OTOP1 OS=Mus musculus OX=10090 GN=Otop1 PE=1 SV=3	8.07	65.7	5.16667	1	1	0	0.125	-2	-0.0078125	2	0.0078125
Q80XB4	Nebulin-related-anchoring protein OS=Mus musculus OX=10090 GN=Nrap PE=1 SV=3	9.31	195.6	1.62037	2	2	0	0.125	-2	-0.0078125	2	0.0078125
Q80ZD8	Amphoterin-induced protein 1 OS=Mus musculus OX=10090 GN=Amigo1 PE=1 SV=1	6.86	55.3	3.04878	1	1	0	0.125	-2	-0.0078125	2	0.0078125
Q80ZS5	Claudin 34B3 OS=Mus musculus OX=10090 GN=Cldn34b3 PE=2 SV=1	9.6	23.3	30.1435	1	1	0	0.125	-2	-0.0078125	2	0.0078125
Q8BG51	Mitochondrial Rho GTPase 1 OS=Mus musculus OX=10090 GN=Rhot1 PE=1 SV=1	6.49	72.2	2.85261	3	2	0	0.125	-2	-0.0078125	2	0.0078125
Q8BG87	Methylcytosine dioxygenase TET3 OS=Mus musculus OX=10090 GN=Tet3 PE=1 SV=4	7.75	194.7	0.443705	1	1	0	0.125	-2	-0.0078125	2	0.0078125
Q8BGB2	Tetratricopeptide repeat protein 7A OS=Mus musculus OX=10090 GN=Ttc7a PE=1 SV=1	6.2	96.1	1.6317	1	1	0	0.125	-2	-0.0078125	2	0.0078125
Q8BGQ4	Protein O-mannosyl-transferase 2 OS=Mus musculus OX=10090 GN=Pomt2 PE=1 SV=1	9.8	92.3	3.04878	1	1	0	0.125	-2	-0.0078125	2	0.0078125
Q8BGR1	PDZ and pleckstrin homology domains 1 OS=Mus musculus OX=10090 GN=Pdzph1 PE=2 SV=1	6.76	138.5	0.646204	1	1	0	0.125	-2	-0.0078125	2	0.0078125
Q8BGY3	Leucine zipper protein 2 OS=Mus musculus OX=10090 GN=Luzp2 PE=2 SV=1	8.5	39	6.08696	1	1	0	0.125	-2	-0.0078125	2	0.0078125
Q8BH00	2-aminomuconic semialdehyde dehydrogenase OS=Mus musculus OX=10090 GN=Aldh8a1 PE=1 SV=1	7.55	53.6	2.46407	1	1	0	0.125	-2	-0.0078125	2	0.0078125
Q8BH16	F-box/LRR-repeat protein 2 OS=Mus musculus OX=10090 GN=Fbxl2 PE=1 SV=1	7.43	46.9	8.74704	1	1	0	0.125	-2	-0.0078125	2	0.0078125
Q8BH57	WD repeat-containing protein 48 OS=Mus musculus OX=10090 GN=Wdr48 PE=1 SV=1	7.17	76	0.591716	1	1	0	0.125	-2	-0.0078125	2	0.0078125
Q8BHN3	Neutral alpha-glucosidase AB OS=Mus musculus OX=10090 GN=Ganab PE=1 SV=1	6.06	106.8	3.07203	5	2	0	0.125	-2	-0.0078125	2	0.0078125
Q8BI58	F-box and WD-40 domain protein 26 OS=Mus musculus OX=10090 GN=Fbxw26 PE=2 SV=1	7.69	53.8	3.21888	1	1	0	0.125	-2	-0.0078125	2	0.0078125
Q8BI99	Zinc finger protein 879 OS=Mus musculus OX=10090 GN=Znf879 PE=2 SV=1	9.44	64	8.34813	1	1	0	0.125	-2	-0.0078125	2	0.0078125
Q8BKF1	DNA-directed RNA polymerase, mitochondrial OS=Mus musculus OX=10090 GN=Polrmt PE=1 SV=1	9.09	136.6	0.57995	1	1	0	0.125	-2	-0.0078125	2	0.0078125
Q8BLV3	Sodium/hydrogen exchanger 7 OS=Mus musculus OX=10090 GN=Slc9a7 PE=1 SV=1	6.4	80.2	1.79063	1	1	0	0.125	-2	-0.0078125	2	0.0078125
Q8BLY2	Threonine--tRNA ligase 2, cytoplasmic OS=Mus musculus OX=10090 GN=Tars3 PE=1 SV=1	7.53	91.3	1.01266	2	1	0	0.125	-2	-0.0078125	2	0.0078125
Q8BM55	Transmembrane protein 214 OS=Mus musculus OX=10090 GN=Tmem214 PE=1 SV=1	9.29	76.4	2.91121	1	1	0	0.125	-2	-0.0078125	2	0.0078125
Q8BMD2	Cilium assembly protein DZIP1 OS=Mus musculus OX=10090 GN=Dzip1 PE=1 SV=3	6.1	97.2	2.93427	1	1	0	0.125	-2	-0.0078125	2	0.0078125
Q8BML1	[F-actin]-monooxygenase MICAL2 OS=Mus musculus OX=10090 GN=Mical2 PE=1 SV=2	8.4	217.9	1.48642	1	1	0	0.125	-2	-0.0078125	2	0.0078125
Q8BND3	WD repeat-containing protein 35 OS=Mus musculus OX=10090 GN=Wdr35 PE=1 SV=3	6.34	133.9	2.54022	1	1	0	0.125	-2	-0.0078125	2	0.0078125
Q8BP47	Asparagine--tRNA ligase, cytoplasmic OS=Mus musculus OX=10090 GN=NARS1 PE=1 SV=2	5.86	64.2	4.65116	2	2	0	0.125	-2	-0.0078125	2	0.0078125
Q8BRF7	Sec1 family domain-containing protein 1 OS=Mus musculus OX=10090 GN=Scfd1 PE=1 SV=1	6.38	72.3	3.59937	1	1	0	0.125	-2	-0.0078125	2	0.0078125
Q8BRM2	RAB6-interacting golgin OS=Mus musculus OX=10090 GN=Gorab PE=1 SV=1	7.36	41.5	11.413	1	1	0	0.125	-2	-0.0078125	2	0.0078125
Q8BSU7	MOB kinase activator 3A OS=Mus musculus OX=10090 GN=Mob3a PE=1 SV=1	8.43	25.5	6.91244	1	1	0	0.125	-2	-0.0078125	2	0.0078125
Q8BTG6	SREBP regulating gene protein OS=Mus musculus OX=10090 GN=Spring1 PE=2 SV=1	7.83	23.5	20	2	2	0	0.125	-2	-0.0078125	2	0.0078125
Q8BTU7	RCC1 domain-containing protein 1 OS=Mus musculus OX=10090 GN=Rccd1 PE=2 SV=2	5.26	40.6	4.24403	1	1	0	0.125	-2	-0.0078125	2	0.0078125
Q8BU40	NACHT, LRR and PYD domains-containing protein 4A OS=Mus musculus OX=10090 GN=Nlrp4a PE=2 SV=1	6.27	112.5	1.12016	1	1	0	0.125	-2	-0.0078125	2	0.0078125
Q8BV57	Soluble scavenger receptor cysteine-rich domain-containing protein SSC5D OS=Mus musculus OX=10090 GN=Ssc5d PE=1 SV=1	5.68	144.5	1.16703	1	1	0	0.125	-2	-0.0078125	2	0.0078125
Q8BVW0	Neutral alpha-glucosidase C OS=Mus musculus OX=10090 GN=Ganc PE=1 SV=2	6.32	101.9	4.45434	1	1	0	0.125	-2	-0.0078125	2	0.0078125
Q8BWB6	Metalloreductase STEAP2 OS=Mus musculus OX=10090 GN=Steap2 PE=1 SV=1	9.2	55.7	0.817996	1	1	0	0.125	-2	-0.0078125	2	0.0078125
Q8BWE1	RIKEN cDNA 1810024B03 gene OS=Mus musculus OX=10090 GN=1810024B03Rik PE=2 SV=1	7.64	22.8	21	1	1	0	0.125	-2	-0.0078125	2	0.0078125
Q8BWG4	Uncharacterized protein KIAA1755 homolog OS=Mus musculus OX=10090 PE=2 SV=2	6.52	129	2.0219	1	1	0	0.125	-2	-0.0078125	2	0.0078125
Q8BZ64	Tectonic-1 OS=Mus musculus OX=10090 GN=Tctn1 PE=1 SV=1	7.28	63.4	2.19224	1	1	0	0.125	-2	-0.0078125	2	0.0078125
Q8BZR9	Nuclear cap-binding protein subunit 3 OS=Mus musculus OX=10090 GN=Ncbp3 PE=1 SV=1	5.8	70	1.30081	1	1	0	0.125	-2	-0.0078125	2	0.0078125
Q8C0L0	Thioredoxin-related transmembrane protein 4 OS=Mus musculus OX=10090 GN=Tmx4 PE=1 SV=2	4.37	37.1	7.76119	2	1	0	0.125	-2	-0.0078125	2	0.0078125
Q8C0N2	Glycerol-3-phosphate acyltransferase 3 OS=Mus musculus OX=10090 GN=Gpat3 PE=1 SV=1	8.94	49	3.19635	1	1	0	0.125	-2	-0.0078125	2	0.0078125
Q8C2S7	Amphoterin-induced protein 3 OS=Mus musculus OX=10090 GN=Amigo3 PE=1 SV=1	7.39	55.6	1.77165	1	1	0	0.125	-2	-0.0078125	2	0.0078125
Q8C2W3	2'-5' oligoadenylate synthetase 1E OS=Mus musculus OX=10090 GN=Oas1e PE=2 SV=1	6	41.9	7.86517	1	1	0	0.125	-2	-0.0078125	2	0.0078125
Q8C4U3	Secreted frizzled-related protein 1 OS=Mus musculus OX=10090 GN=Sfrp1 PE=1 SV=3	8.94	35.4	11.1465	1	1	0	0.125	-2	-0.0078125	2	0.0078125
Q8C804	Spindle and centriole-associated protein 1 OS=Mus musculus OX=10090 GN=Spice1 PE=1 SV=2	7.05	95.6	5.69767	1	1	0	0.125	-2	-0.0078125	2	0.0078125
Q8C9M2	Coiled-coil domain-containing protein 15 OS=Mus musculus OX=10090 GN=Ccdc15 PE=2 SV=2	8.09	93.5	4.19753	2	2	0	0.125	-2	-0.0078125	2	0.0078125
Q8C9Y8	Predicted gene 9903 OS=Mus musculus OX=10090 GN=Gm9903 PE=2 SV=1	8.6	14.3	11.6279	5	1	0	0.125	-2	-0.0078125	2	0.0078125
Q8CAT8	F-box only protein 48 OS=Mus musculus OX=10090 GN=Fbxo48 PE=2 SV=1	8.22	18.8	12.4224	1	1	0	0.125	-2	-0.0078125	2	0.0078125
Q8CDC0	Serpin B13 OS=Mus musculus OX=10090 GN=Serpinb13 PE=2 SV=2	5.43	44.3	2.05656	1	1	0	0.125	-2	-0.0078125	2	0.0078125
Q8CFE8	F-box and WD-40 domain protein 17 OS=Mus musculus OX=10090 GN=Fbxw17 PE=1 SV=1	7.66	52.2	4.93562	1	1	0	0.125	-2	-0.0078125	2	0.0078125
Q8CGM2	Retinitis pigmentosa 1-like 1 protein OS=Mus musculus OX=10090 GN=Rp1l1 PE=1 SV=1	6.48	199.6	2.31307	1	1	0	0.125	-2	-0.0078125	2	0.0078125
Q8CHH5	BRD4-interacting chromatin-remodeling complex-associated protein-like OS=Mus musculus OX=10090 GN=Bicral PE=1 SV=2	6.62	114.3	2.42086	1	1	0	0.125	-2	-0.0078125	2	0.0078125
Q8CIV8	Tubulin-specific chaperone E OS=Mus musculus OX=10090 GN=Tbce PE=1 SV=1	6.29	59	1.71756	1	1	0	0.125	-2	-0.0078125	2	0.0078125
Q8K083	Zinc finger protein 536 OS=Mus musculus OX=10090 GN=Znf536 PE=1 SV=1	7.33	141.5	2.68817	2	2	0	0.125	-2	-0.0078125	2	0.0078125
Q8K093	Thyrotropin-releasing hormone-degrading ectoenzyme OS=Mus musculus OX=10090 GN=Trhde PE=1 SV=1	7.06	117.4	2.73171	1	1	0	0.125	-2	-0.0078125	2	0.0078125
Q8K0L3	Acyl-coenzyme A synthetase ACSM2, mitochondrial OS=Mus musculus OX=10090 GN=Acsm2 PE=1 SV=1	8.31	64.2	2.43478	1	1	0	0.125	-2	-0.0078125	2	0.0078125
Q8K1T0	Transmembrane protease serine 3 OS=Mus musculus OX=10090 GN=Tmprss3 PE=1 SV=2	6.51	49.5	1.766	1	1	0	0.125	-2	-0.0078125	2	0.0078125
Q8K2J1	Carbonic anhydrase OS=Mus musculus OX=10090 GN=Car12 PE=1 SV=1	8.31	38.7	8.13953	1	1	0	0.125	-2	-0.0078125	2	0.0078125
Q8K348	Activin receptor type-1C OS=Mus musculus OX=10090 GN=Acvr1c PE=2 SV=3	7.58	54.7	9.33063	2	2	0	0.125	-2	-0.0078125	2	0.0078125
Q8K450	Sperm-associated antigen 16 protein OS=Mus musculus OX=10090 GN=Spag16 PE=1 SV=1	6.09	71.4	6.57277	1	1	0	0.125	-2	-0.0078125	2	0.0078125
Q8K5C0	Grainyhead-like protein 2 homolog OS=Mus musculus OX=10090 GN=Grhl2 PE=2 SV=1	6.44	71.2	2.56	1	1	0	0.125	-2	-0.0078125	2	0.0078125
Q8R0W0	Epiplakin OS=Mus musculus OX=10090 GN=Eppk1 PE=1 SV=2	6.07	724.2	0.122175	1	1	0	0.125	-2	-0.0078125	2	0.0078125
Q8R1G2	Carboxymethylenebutenolidase homolog OS=Mus musculus OX=10090 GN=Cmbl PE=1 SV=1	7.18	27.9	12.6531	1	1	0	0.125	-2	-0.0078125	2	0.0078125
Q8R1N0	Zinc finger protein 830 OS=Mus musculus OX=10090 GN=Znf830 PE=1 SV=1	5.4	40.6	4.95868	1	1	0	0.125	-2	-0.0078125	2	0.0078125
Q8R2A7	Vomeronasal type-1 receptor OS=Mus musculus OX=10090 GN=Vmn1r228 PE=2 SV=1	9.44	38.3	7.20721	1	1	0	0.125	-2	-0.0078125	2	0.0078125
Q8R2S8	CD177 antigen OS=Mus musculus OX=10090 GN=Cd177 PE=2 SV=1	5.67	87	4.77356	1	1	0	0.125	-2	-0.0078125	2	0.0078125
Q8R3C6	Probable RNA-binding protein 19 OS=Mus musculus OX=10090 GN=Rbm19 PE=1 SV=1	6.57	106	1.57563	1	1	0	0.125	-2	-0.0078125	2	0.0078125
Q8R3E3	WD repeat domain phosphoinositide-interacting protein 1 OS=Mus musculus OX=10090 GN=Wipi1 PE=1 SV=1	6.46	48.7	6.50224	1	1	0	0.125	-2	-0.0078125	2	0.0078125
Q8R3F5	Malonyl-CoA-acyl carrier protein transacylase, mitochondrial OS=Mus musculus OX=10090 GN=Mcat PE=1 SV=3	8.1	41.9	5.77428	1	1	0	0.125	-2	-0.0078125	2	0.0078125
Q8R411	Myc target protein 1 OS=Mus musculus OX=10090 GN=Myct1 PE=1 SV=1	11	21.1	2.65957	2	1	0	0.125	-2	-0.0078125	2	0.0078125
Q8R534	Disintegrin and metalloproteinase domain-containing protein 1b OS=Mus musculus OX=10090 GN=Adam1b PE=1 SV=2	4.92	89.3	2.8536	1	1	0	0.125	-2	-0.0078125	2	0.0078125
Q8VCD5	Mediator of RNA polymerase II transcription subunit 17 OS=Mus musculus OX=10090 GN=Med17 PE=1 SV=1	7.3	72.4	2.00308	1	1	0	0.125	-2	-0.0078125	2	0.0078125
Q8VDL9	Zinc finger protein GLIS2 OS=Mus musculus OX=10090 GN=Glis2 PE=1 SV=1	8.76	55.8	1.91939	1	1	0	0.125	-2	-0.0078125	2	0.0078125
Q8VDU5	SNF-related serine/threonine-protein kinase OS=Mus musculus OX=10090 GN=Snrk PE=1 SV=1	7.49	81.9	3.60963	3	2	0	0.125	-2	-0.0078125	2	0.0078125
Q8VDV0	Integrin beta-like protein 1 OS=Mus musculus OX=10090 GN=Itgbl1 PE=2 SV=2	5.49	53.9	7.48988	2	2	0	0.125	-2	-0.0078125	2	0.0078125
Q8VE08	F-box only protein 33 OS=Mus musculus OX=10090 GN=Fbxo33 PE=1 SV=3	8.05	63.3	9.07473	1	1	0	0.125	-2	-0.0078125	2	0.0078125
Q8VEG6	CCR4-NOT transcription complex subunit 6-like OS=Mus musculus OX=10090 GN=Cnot6l PE=1 SV=2	6.57	63	1.98198	1	1	0	0.125	-2	-0.0078125	2	0.0078125
Q8VEV1	Olfactory receptor OS=Mus musculus OX=10090 GN=Olfr437 PE=2 SV=1	8.19	34.9	10.3226	1	1	0	0.125	-2	-0.0078125	2	0.0078125
Q8VFK7	Olfactory receptor 1020 OS=Mus musculus OX=10090 GN=Olfr1020 PE=3 SV=1	8.62	35.3	11.3565	1	1	0	0.125	-2	-0.0078125	2	0.0078125
Q8VFP0	Olfactory receptor OS=Mus musculus OX=10090 GN=Olfr303 PE=2 SV=1	8.91	35.7	3.44828	1	1	0	0.125	-2	-0.0078125	2	0.0078125
Q8VGN0	Olfactory receptor OS=Mus musculus OX=10090 GN=Olfr1233 PE=2 SV=1	8.31	34.3	10.4918	1	1	0	0.125	-2	-0.0078125	2	0.0078125
Q8VGU3	Olfactory receptor OS=Mus musculus OX=10090 GN=Olfr1413 PE=2 SV=1	8.68	35.5	13.0031	1	1	0	0.125	-2	-0.0078125	2	0.0078125
Q8VHG2	Angiomotin OS=Mus musculus OX=10090 GN=Amot PE=1 SV=3	7.5	120.8	1.42096	1	1	0	0.125	-2	-0.0078125	2	0.0078125
Q91XY7	Protocadherin gamma A12 OS=Mus musculus OX=10090 GN=Pcdhga12 PE=1 SV=1	4.97	100.8	2.14592	3	1	0	0.125	-2	-0.0078125	2	0.0078125
Q91Z67	SLIT-ROBO Rho GTPase-activating protein 2 OS=Mus musculus OX=10090 GN=Srgap2 PE=1 SV=2	6.64	120.7	0.373483	1	1	0	0.125	-2	-0.0078125	2	0.0078125
Q91ZF2	Cathepsin 7 OS=Mus musculus OX=10090 GN=Cts7 PE=2 SV=1	8.19	37.7	3.32326	1	1	0	0.125	-2	-0.0078125	2	0.0078125
Q91ZM8	Calcium-binding protein 7 OS=Mus musculus OX=10090 GN=Cabp7 PE=2 SV=1	4.67	24.4	5.5814	1	1	0	0.125	-2	-0.0078125	2	0.0078125
Q91ZR3	CREB/ATF bZIP transcription factor OS=Mus musculus OX=10090 GN=Crebzf PE=1 SV=2	5.86	37.8	8.10056	3	2	0	0.125	-2	-0.0078125	2	0.0078125
Q91ZS8	Double-stranded RNA-specific editase 1 OS=Mus musculus OX=10090 GN=Adarb1 PE=1 SV=1	8.94	78	3.93812	1	1	0	0.125	-2	-0.0078125	2	0.0078125
Q922U1	U4/U6 small nuclear ribonucleoprotein Prp3 OS=Mus musculus OX=10090 GN=Prpf3 PE=1 SV=1	9.5	77.4	1.75695	1	1	0	0.125	-2	-0.0078125	2	0.0078125
Q922W5	Pyrroline-5-carboxylate reductase 1, mitochondrial OS=Mus musculus OX=10090 GN=Pycr1 PE=1 SV=1	6.86	32.4	11.0032	1	1	0	0.125	-2	-0.0078125	2	0.0078125
Q924C1	Exportin-5 OS=Mus musculus OX=10090 GN=Xpo5 PE=1 SV=1	5.82	136.9	2.90698	1	1	0	0.125	-2	-0.0078125	2	0.0078125
Q924C5	Alpha-protein kinase 3 OS=Mus musculus OX=10090 GN=Alpk3 PE=1 SV=2	6.16	180	0.952381	1	1	0	0.125	-2	-0.0078125	2	0.0078125
Q924L1	LETM1 domain-containing protein 1 OS=Mus musculus OX=10090 GN=Letmd1 PE=1 SV=1	10.54	41.7	5.27778	1	1	0	0.125	-2	-0.0078125	2	0.0078125
Q99JB7	Protein amnionless OS=Mus musculus OX=10090 GN=Amn PE=1 SV=1	5.55	48.7	2.83843	1	1	0	0.125	-2	-0.0078125	2	0.0078125
Q99K41	EMILIN-1 OS=Mus musculus OX=10090 GN=Emilin1 PE=1 SV=1	5.3	107.5	1.27827	1	1	0	0.125	-2	-0.0078125	2	0.0078125
Q99KP3	Lambda-crystallin homolog OS=Mus musculus OX=10090 GN=Cryl1 PE=1 SV=3	5.86	35.2	8.46395	1	1	0	0.125	-2	-0.0078125	2	0.0078125
Q99LG0	Ubiquitin carboxyl-terminal hydrolase 16 OS=Mus musculus OX=10090 GN=Usp16 PE=1 SV=2	6.18	93.4	1.69697	1	1	0	0.125	-2	-0.0078125	2	0.0078125
Q99MB1	Toll-like receptor 3 OS=Mus musculus OX=10090 GN=Tlr3 PE=1 SV=2	7.93	103.6	4.0884	1	1	0	0.125	-2	-0.0078125	2	0.0078125
Q99MY8	Histone-lysine N-methyltransferase ASH1L OS=Mus musculus OX=10090 GN=Ash1l PE=1 SV=3	9.35	331.1	0.338066	2	1	0	0.125	-2	-0.0078125	2	0.0078125
Q99MZ6	Unconventional myosin-VIIb OS=Mus musculus OX=10090 GN=Myo7b PE=1 SV=3	8.92	240.7	0.804543	1	1	0	0.125	-2	-0.0078125	2	0.0078125
Q99PL5	Ribosome-binding protein 1 OS=Mus musculus OX=10090 GN=Rrbp1 PE=1 SV=2	9.33	172.8	0.560748	1	1	0	0.125	-2	-0.0078125	2	0.0078125
Q99PP2	Zinc finger protein 318 OS=Mus musculus OX=10090 GN=Znf318 PE=1 SV=3	7.01	246.2	0.804649	1	1	0	0.125	-2	-0.0078125	2	0.0078125
Q9CQ11	Lymphocyte antigen 6 complex, locus M OS=Mus musculus OX=10090 GN=Ly6m PE=2 SV=1	7.78	12.3	19.8198	1	1	0	0.125	-2	-0.0078125	2	0.0078125
Q9CQ33	Leucine-zipper-like transcriptional regulator 1 OS=Mus musculus OX=10090 GN=Lztr1 PE=1 SV=2	6.47	94.4	4.77897	2	2	0	0.125	-2	-0.0078125	2	0.0078125
Q9CQC9	GTP-binding protein SAR1b OS=Mus musculus OX=10090 GN=Sar1b PE=1 SV=1	6.11	22.4	8.08081	1	1	0	0.125	-2	-0.0078125	2	0.0078125
Q9CQH1	Transmembrane epididymal family member 3 OS=Mus musculus OX=10090 GN=Teddm3 PE=2 SV=1	8.03	33.7	10.8844	1	1	0	0.125	-2	-0.0078125	2	0.0078125
Q9CR25	2-(3-amino-3-carboxypropyl)histidine synthase subunit 2 OS=Mus musculus OX=10090 GN=Dph2 PE=1 SV=1	5.53	52.3	1.22699	4	1	0	0.125	-2	-0.0078125	2	0.0078125
Q9CR33	MANSC domain-containing protein 1 OS=Mus musculus OX=10090 GN=Mansc1 PE=2 SV=1	9.11	44.8	9.42029	1	1	0	0.125	-2	-0.0078125	2	0.0078125
Q9CS42	Ribose-phosphate pyrophosphokinase 2 OS=Mus musculus OX=10090 GN=Prps2 PE=1 SV=4	6.61	34.8	5.03145	3	1	0	0.125	-2	-0.0078125	2	0.0078125
Q9CW07	Protein phosphatase 1 regulatory subunit 3G OS=Mus musculus OX=10090 GN=Ppp1r3g PE=1 SV=2	5	37.8	10.6628	1	1	0	0.125	-2	-0.0078125	2	0.0078125
Q9CX34	Protein SGT1 homolog OS=Mus musculus OX=10090 GN=Sugt1 PE=1 SV=3	5.45	38.1	12.5	2	1	0	0.125	-2	-0.0078125	2	0.0078125
Q9CXY6	Interleukin enhancer-binding factor 2 OS=Mus musculus OX=10090 GN=Ilf2 PE=1 SV=1	5.26	43	6.41026	1	1	0	0.125	-2	-0.0078125	2	0.0078125
Q9CYN9	Renin receptor OS=Mus musculus OX=10090 GN=Atp6ap2 PE=1 SV=2	5.54	39.1	3.71429	1	1	0	0.125	-2	-0.0078125	2	0.0078125
Q9D0G0	28S ribosomal protein S30, mitochondrial OS=Mus musculus OX=10090 GN=Mrps30 PE=1 SV=1	9.38	49.9	2.94118	1	1	0	0.125	-2	-0.0078125	2	0.0078125
Q9D1E4	Cysteine-rich tail protein 1 OS=Mus musculus OX=10090 GN=Cysrt1 PE=2 SV=1	7.08	15.1	14.7887	2	1	0	0.125	-2	-0.0078125	2	0.0078125
Q9D259	Cysteine-rich secretory protein OS=Mus musculus OX=10090 GN=Crisp4 PE=2 SV=1	5.81	28.7	15.6	3	1	0	0.125	-2	-0.0078125	2	0.0078125
Q9D454	Uncharacterized protein CXorf49 homolog OS=Mus musculus OX=10090 PE=1 SV=1	7.21	55.2	1.36452	1	1	0	0.125	-2	-0.0078125	2	0.0078125
Q9D4F3	Family with sequence similarity 90, member A1B OS=Mus musculus OX=10090 GN=Fam90a1b PE=2 SV=1	7.15	47.6	4.29594	1	1	0	0.125	-2	-0.0078125	2	0.0078125
Q9D6E4	Tetratricopeptide repeat protein 9B OS=Mus musculus OX=10090 GN=Ttc9b PE=1 SV=1	9.48	25.9	10.0418	1	1	0	0.125	-2	-0.0078125	2	0.0078125
Q9D8N3	Lysoplasmalogenase-like protein TMEM86A OS=Mus musculus OX=10090 GN=Tmem86a PE=2 SV=1	8.56	26.3	16.1826	1	1	0	0.125	-2	-0.0078125	2	0.0078125
Q9D9V2	Equatorin OS=Mus musculus OX=10090 GN=Eqtn PE=1 SV=2	4.82	37.7	7.71513	4	1	0	0.125	-2	-0.0078125	2	0.0078125
Q9DAK9	14 kDa phosphohistidine phosphatase OS=Mus musculus OX=10090 GN=Phpt1 PE=1 SV=1	5.53	14	8.87097	2	1	0	0.125	-2	-0.0078125	2	0.0078125
Q9DC29	ATP-binding cassette sub-family B member 6 OS=Mus musculus OX=10090 GN=Abcb6 PE=1 SV=1	8.05	93.7	0.950119	2	1	0	0.125	-2	-0.0078125	2	0.0078125
Q9DCL8	Protein phosphatase inhibitor 2 OS=Mus musculus OX=10090 GN=Ppp1r2 PE=1 SV=3	4.83	23.1	1.94175	1	1	0	0.125	-2	-0.0078125	2	0.0078125
Q9EQ32	Phosphoinositide 3-kinase adapter protein 1 OS=Mus musculus OX=10090 GN=Pik3ap1 PE=1 SV=1	5.17	90.9	3.20592	1	1	0	0.125	-2	-0.0078125	2	0.0078125
Q9EQH3	Vacuolar protein sorting-associated protein 35 OS=Mus musculus OX=10090 GN=Vps35 PE=1 SV=1	5.44	91.7	2.51256	1	1	0	0.125	-2	-0.0078125	2	0.0078125
Q9EQQ9	Protein O-GlcNAcase OS=Mus musculus OX=10090 GN=Oga PE=1 SV=2	4.92	103.1	1.41921	1	1	0	0.125	-2	-0.0078125	2	0.0078125
Q9ESJ4	NCK-interacting protein with SH3 domain OS=Mus musculus OX=10090 GN=Nckipsd PE=1 SV=2	6.05	78.5	5.46218	1	1	0	0.125	-2	-0.0078125	2	0.0078125
Q9JHG6	Calcipressin-1 OS=Mus musculus OX=10090 GN=Rcan1 PE=1 SV=2	5.41	28.1	8.36653	1	1	0	0.125	-2	-0.0078125	2	0.0078125
Q9JIC0	KRAB zinc finger protein OS=Mus musculus OX=10090 GN=Zfp119a PE=2 SV=1	8.34	63	5.13761	1	1	0	0.125	-2	-0.0078125	2	0.0078125
Q9JIF0	Protein arginine N-methyltransferase 1 OS=Mus musculus OX=10090 GN=Prmt1 PE=1 SV=1	5.43	42.4	3.2345	2	1	0	0.125	-2	-0.0078125	2	0.0078125
Q9JIM1	Equilibrative nucleoside transporter 1 OS=Mus musculus OX=10090 GN=Slc29a1 PE=1 SV=3	8.31	50.2	11.3043	3	2	0	0.125	-2	-0.0078125	2	0.0078125
Q9JIQ8	Transmembrane protease serine 2 OS=Mus musculus OX=10090 GN=Tmprss2 PE=2 SV=3	7.81	53.5	8.16327	1	1	0	0.125	-2	-0.0078125	2	0.0078125
Q9JIS7	Voltage-dependent L-type calcium channel subunit alpha-1F OS=Mus musculus OX=10090 GN=Cacna1f PE=1 SV=1	6.11	221.8	2.61965	2	2	0	0.125	-2	-0.0078125	2	0.0078125
Q9JJ80	Ribosome production factor 2 homolog OS=Mus musculus OX=10090 GN=Rpf2 PE=2 SV=2	10.04	35.3	4.90196	1	1	0	0.125	-2	-0.0078125	2	0.0078125
Q9JLG4	Polycystic kidney disease 2-like 2 protein OS=Mus musculus OX=10090 GN=Pkd2l2 PE=2 SV=2	8.21	73.6	3.05958	2	1	0	0.125	-2	-0.0078125	2	0.0078125
Q9JMC3	DnaJ homolog subfamily A member 4 OS=Mus musculus OX=10090 GN=Dnaja4 PE=1 SV=1	7.58	44.9	3.52645	2	1	0	0.125	-2	-0.0078125	2	0.0078125
Q9QXX8	Nuclear fragile X mental retardation-interacting protein 1 OS=Mus musculus OX=10090 GN=Nufip1 PE=1 SV=1	9.47	54.7	6.19835	1	1	0	0.125	-2	-0.0078125	2	0.0078125
Q9QZN1	F-box/LRR-repeat protein 17 OS=Mus musculus OX=10090 GN=Fbxl17 PE=1 SV=3	8.1	75.6	5.56348	1	1	0	0.125	-2	-0.0078125	2	0.0078125
Q9QZR0	E3 ubiquitin-protein ligase RNF25 OS=Mus musculus OX=10090 GN=Rnf25 PE=1 SV=2	6.29	51.2	2.63158	1	1	0	0.125	-2	-0.0078125	2	0.0078125
Q9R1Q8	Transgelin-3 OS=Mus musculus OX=10090 GN=Tagln3 PE=1 SV=1	7.33	22.5	7.03518	2	1	0	0.125	-2	-0.0078125	2	0.0078125
Q9R1X5	ATP-binding cassette sub-family C member 5 OS=Mus musculus OX=10090 GN=Abcc5 PE=1 SV=2	8.6	161	2.15877	1	1	0	0.125	-2	-0.0078125	2	0.0078125
Q9WUF3	CASP8-associated protein 2 OS=Mus musculus OX=10090 GN=Casp8ap2 PE=1 SV=2	6.67	219	2.80326	3	2	0	0.125	-2	-0.0078125	2	0.0078125
Q9WUM5	Succinate--CoA ligase [ADP/GDP-forming] subunit alpha, mitochondrial OS=Mus musculus OX=10090 GN=Suclg1 PE=1 SV=4	9.39	36.1	4.62428	1	1	0	0.125	-2	-0.0078125	2	0.0078125
Q9WVA3	Mitotic checkpoint protein BUB3 OS=Mus musculus OX=10090 GN=Bub3 PE=1 SV=2	6.84	36.9	6.13497	1	1	0	0.125	-2	-0.0078125	2	0.0078125
Q9WVF7	DNA polymerase epsilon catalytic subunit A OS=Mus musculus OX=10090 GN=Pole PE=1 SV=3	6.44	261.9	0.569426	1	1	0	0.125	-2	-0.0078125	2	0.0078125
Q9WVJ0	Potassium voltage-gated channel subfamily H member 3 OS=Mus musculus OX=10090 GN=Kcnh3 PE=2 SV=3	7.64	118.2	2.46575	1	1	0	0.125	-2	-0.0078125	2	0.0078125
Q9WVP6	Poly(A) polymerase beta OS=Mus musculus OX=10090 GN=Papolb PE=1 SV=3	6.74	72.3	5.919	1	1	0	0.125	-2	-0.0078125	2	0.0078125
Q9Z186	Glucose-6-phosphatase 2 OS=Mus musculus OX=10090 GN=G6pc2 PE=1 SV=1	8.24	40.7	8.4507	1	1	0	0.125	-2	-0.0078125	2	0.0078125
Q9Z2U2	Zinc finger protein 292 OS=Mus musculus OX=10090 GN=Zfp292 PE=1 SV=2	7.53	300.9	0.444774	2	2	0	0.125	-2	-0.0078125	2	0.0078125
R4GML0	Zinc finger protein 106 OS=Mus musculus OX=10090 GN=Zfp106 PE=1 SV=1	7.62	208.7	3.4428	2	2	0	0.125	-2	-0.0078125	2	0.0078125
S4R1I1	Ankyrin-2 OS=Mus musculus OX=10090 GN=Ank2 PE=1 SV=1	9.06	45.1	4.06699	1	1	0	0.125	-2	-0.0078125	2	0.0078125
V9GXX7	DNA repair protein SWI5 homolog (Fragment) OS=Mus musculus OX=10090 GN=Swi5 PE=1 SV=1	6.02	16.1	39.2857	1	1	0	0.125	-2	-0.0078125	2	0.0078125
Z4YLB7	Neuroplastin OS=Mus musculus OX=10090 GN=Nptn PE=1 SV=1	7.49	30.9	22.0217	2	2	0	0.125	-2	-0.0078125	2	0.0078125
A0A0N4SUI8	T-complex protein 1 subunit eta (Fragment) OS=Mus musculus OX=10090 GN=Cct7 PE=1 SV=1	6.04	8.9	5.06329	3	1	0	0.25	-2	-0.03125	2	0.03125
A0A171EBK7	V-type immunoglobulin domain-containing suppressor of T-cell activation OS=Mus musculus OX=10090 GN=Vsir PE=1 SV=1	7.53	33.6	4.53074	2	1	0	0.25	-2	-0.03125	2	0.03125
A0A1B0GR10	Predicted gene, 40460 OS=Mus musculus OX=10090 GN=Gm40460 PE=4 SV=1	7.88	22.7	37.7049	6	2	0	0.25	-2	-0.03125	2	0.03125
A0A1D5RLM8	Predicted gene 11639 OS=Mus musculus OX=10090 GN=Gm11639 PE=1 SV=1	5.4	653.8	1.36019	5	5	0	0.25	-2	-0.03125	2	0.03125
A0A1D5RM70	POTE ankyrin domain family member 3F (Fragment) OS=Mus musculus OX=10090 GN=Potefam3f PE=4 SV=1	8.18	29.2	1.50943	2	1	0	0.25	-2	-0.03125	2	0.03125
A0A1L1STC6	Nesprin-1 OS=Mus musculus OX=10090 GN=Syne1 PE=1 SV=1	5.58	1009.3	0.636436	5	4	0	0.25	-2	-0.03125	2	0.03125
A0A1Y7VJ19	Baculoviral IAP repeat-containing protein 1a OS=Mus musculus OX=10090 GN=Naip1 PE=1 SV=1	6.11	45.3	2.24439	2	1	0	0.25	-2	-0.03125	2	0.03125
A0A1Y7VMP7	MutL homolog 3 OS=Mus musculus OX=10090 GN=Mlh3 PE=3 SV=1	7.05	162.4	1.8018	4	1	0	0.25	-2	-0.03125	2	0.03125
A0A5F8MPE3	PR domain-containing protein 11 OS=Mus musculus OX=10090 GN=Prdm11 PE=1 SV=1	6.13	133.7	1.02389	3	1	0	0.25	-2	-0.03125	2	0.03125
A2A5Y6	Microtubule-associated protein OS=Mus musculus OX=10090 GN=Mapt PE=1 SV=1	6.51	78	2.13618	8	1	0	0.25	-2	-0.03125	2	0.03125
A2A841	Band 4.1 OS=Mus musculus OX=10090 GN=Epb41 PE=1 SV=1	5.49	97.2	4.14269	3	2	0	0.25	-2	-0.03125	2	0.03125
A2AAE1	Transmembrane protein KIAA1109 OS=Mus musculus OX=10090 GN=Kiaa1109 PE=1 SV=4	6.61	555	0.819181	5	3	0	0.25	-2	-0.03125	2	0.03125
A2AI52	Ubiquitin carboxyl-terminal hydrolase 8 OS=Mus musculus OX=10090 GN=Usp8 PE=1 SV=1	8.54	123.8	2.47479	2	1	0	0.25	-2	-0.03125	2	0.03125
A2AT37	Regulator of nonsense transcripts 2 OS=Mus musculus OX=10090 GN=Upf2 PE=1 SV=1	5.64	147.5	1.26084	3	2	0	0.25	-2	-0.03125	2	0.03125
B2RPU6	Nuclear protein MDM1 OS=Mus musculus OX=10090 GN=Mdm1 PE=1 SV=1	9.44	80.8	5.01393	3	2	0	0.25	-2	-0.03125	2	0.03125
B2RUS7	ATP-binding cassette, sub-family C (CFTR/MRP), member 8 OS=Mus musculus OX=10090 GN=Abcc8 PE=1 SV=1	8.19	178	2.64484	2	1	0	0.25	-2	-0.03125	2	0.03125
D3YUC5	Folliculin-interacting protein 2 OS=Mus musculus OX=10090 GN=Fnip2 PE=1 SV=1	6.61	125.5	2.89982	3	2	0	0.25	-2	-0.03125	2	0.03125
D3Z2Y8	D-beta-hydroxybutyrate dehydrogenase, mitochondrial (Fragment) OS=Mus musculus OX=10090 GN=Bdh1 PE=1 SV=1	9.61	29.1	4.15094	4	1	0	0.25	-2	-0.03125	2	0.03125
E9PUQ7	tRNA (uracil-5-)-methyltransferase homolog A OS=Mus musculus OX=10090 GN=Trmt2a PE=1 SV=1	7.3	67.6	5.22023	4	1	0	0.25	-2	-0.03125	2	0.03125
E9Q067	Vomeronasal 2, receptor 79 OS=Mus musculus OX=10090 GN=Vmn2r79 PE=4 SV=1	8	97.9	4.23032	2	1	0	0.25	-2	-0.03125	2	0.03125
E9Q0I4	SCO-spondin OS=Mus musculus OX=10090 GN=Sspo PE=3 SV=2	5.8	550.8	2.64386	5	5	0	0.25	-2	-0.03125	2	0.03125
E9Q1J0	Zinc finger protein 558 OS=Mus musculus OX=10090 GN=Zfp558 PE=4 SV=1	8.66	46.4	11.5479	5	2	0	0.25	-2	-0.03125	2	0.03125
E9QAQ5	Glycogen synthase kinase-3 beta OS=Mus musculus OX=10090 GN=Gsk3b PE=1 SV=1	8.78	48	2.07852	2	1	0	0.25	-2	-0.03125	2	0.03125
F6W2T4	Complement factor B (Fragment) OS=Mus musculus OX=10090 GN=Cfb PE=4 SV=1	8.75	29.4	10.0386	2	2	0	0.25	-2	-0.03125	2	0.03125
F6XJA1	Myelin expression factor 2 (Fragment) OS=Mus musculus OX=10090 GN=Myef2 PE=1 SV=1	9.26	48	12.5561	2	2	0	0.25	-2	-0.03125	2	0.03125
F8VPL2	Phosphatidylinositol-4-phosphate 3-kinase OS=Mus musculus OX=10090 GN=Pik3c2a PE=1 SV=1	8.02	190.6	1.18624	2	2	0	0.25	-2	-0.03125	2	0.03125
G3X8R0	Receptor expression-enhancing protein OS=Mus musculus OX=10090 GN=Reep5 PE=1 SV=1	8.12	21.4	5.29101	8	1	0	0.25	-2	-0.03125	2	0.03125
G3X931	Vomeronasal 2, receptor 65 OS=Mus musculus OX=10090 GN=Vmn2r65 PE=4 SV=1	8.5	97.4	3.07692	2	1	0	0.25	-2	-0.03125	2	0.03125
H3BLK8	Zinc finger homeobox protein 4 OS=Mus musculus OX=10090 GN=Zfhx4 PE=1 SV=1	6.37	397.8	2.68996	5	4	0	0.25	-2	-0.03125	2	0.03125
J3QMG3	Voltage-dependent anion-selective channel protein 3 OS=Mus musculus OX=10090 GN=Vdac3 PE=1 SV=1	8.79	30.8	10.5634	3	1	0	0.25	-2	-0.03125	2	0.03125
J3QPG5	Prosaposin OS=Mus musculus OX=10090 GN=Psap PE=1 SV=1	5.29	61.3	1.6158	2	1	0	0.25	-2	-0.03125	2	0.03125
J3QPY3	Fas apoptotic inhibitory molecule-like OS=Mus musculus OX=10090 GN=Faiml PE=4 SV=1	7.84	20	9.55056	2	1	0	0.25	-2	-0.03125	2	0.03125
L7N1W8	Vomeronasal 2, receptor 88 OS=Mus musculus OX=10090 GN=Vmn2r88 PE=4 SV=1	7.74	98.1	7.11785	2	2	0	0.25	-2	-0.03125	2	0.03125
M0QWG1	Genetic suppressor element 1 (Fragment) OS=Mus musculus OX=10090 GN=Gse1 PE=4 SV=2	6.74	78.1	5.34979	2	2	0	0.25	-2	-0.03125	2	0.03125
O35295	Transcriptional activator protein Pur-beta OS=Mus musculus OX=10090 GN=Purb PE=1 SV=3	5.43	33.9	9.5679	3	2	0	0.25	-2	-0.03125	2	0.03125
O55098	Serine/threonine-protein kinase 10 OS=Mus musculus OX=10090 GN=Stk10 PE=1 SV=2	7.15	111.8	2.27743	3	2	0	0.25	-2	-0.03125	2	0.03125
O88737	Protein bassoon OS=Mus musculus OX=10090 GN=Bsn PE=1 SV=4	7.71	418.6	1.95332	3	3	0	0.25	-2	-0.03125	2	0.03125
O88898	Tumor protein 63 OS=Mus musculus OX=10090 GN=Tp63 PE=1 SV=1	6.65	76.7	0.588235	2	1	0	0.25	-2	-0.03125	2	0.03125
P08071	Lactotransferrin OS=Mus musculus OX=10090 GN=Ltf PE=1 SV=4	8.53	77.8	2.12164	2	1	0	0.25	-2	-0.03125	2	0.03125
P10630	Eukaryotic initiation factor 4A-II OS=Mus musculus OX=10090 GN=Eif4a2 PE=1 SV=2	5.48	46.4	9.09091	5	3	0	0.25	-2	-0.03125	2	0.03125
P17426	AP-2 complex subunit alpha-1 OS=Mus musculus OX=10090 GN=Ap2a1 PE=1 SV=1	7.03	107.6	3.27533	4	1	0	0.25	-2	-0.03125	2	0.03125
P17665	Cytochrome c oxidase subunit 7C, mitochondrial OS=Mus musculus OX=10090 GN=Cox7c PE=1 SV=1	11	7.3	14.2857	2	1	0	0.25	-2	-0.03125	2	0.03125
P25206	DNA replication licensing factor MCM3 OS=Mus musculus OX=10090 GN=Mcm3 PE=1 SV=2	5.55	91.5	7.38916	3	3	0	0.25	-2	-0.03125	2	0.03125
P47962	60S ribosomal protein L5 OS=Mus musculus OX=10090 GN=Rpl5 PE=1 SV=3	9.77	34.4	4.3771	6	1	0	0.25	-2	-0.03125	2	0.03125
P56394	Cytochrome c oxidase copper chaperone OS=Mus musculus OX=10090 GN=Cox17 PE=1 SV=2	7.69	6.8	20.6349	3	1	0	0.25	-2	-0.03125	2	0.03125
P62743	AP-2 complex subunit sigma OS=Mus musculus OX=10090 GN=Ap2s1 PE=1 SV=1	6.18	17	7.04225	2	1	0	0.25	-2	-0.03125	2	0.03125
P70168	Importin subunit beta-1 OS=Mus musculus OX=10090 GN=Kpnb1 PE=1 SV=2	4.78	97.1	1.0274	2	1	0	0.25	-2	-0.03125	2	0.03125
Q07079	Insulin-like growth factor-binding protein 5 OS=Mus musculus OX=10090 GN=Igfbp5 PE=1 SV=1	8.12	30.4	9.5941	2	1	0	0.25	-2	-0.03125	2	0.03125
Q3TLP8	Ras-related C3 botulinum toxin substrate 1 OS=Mus musculus OX=10090 GN=Rac1 PE=1 SV=1	8.69	23.4	15.6398	4	3	0	0.25	-2	-0.03125	2	0.03125
Q3TPQ7	Expressed sequence AW146154 OS=Mus musculus OX=10090 GN=AW146154 PE=1 SV=1	9.33	54.8	2.5641	2	1	0	0.25	-2	-0.03125	2	0.03125
Q3TZT4	Inositol-polyphosphate 5-phosphatase OS=Mus musculus OX=10090 GN=Inpp5a PE=1 SV=1	7.06	48.9	2.38095	2	1	0	0.25	-2	-0.03125	2	0.03125
Q3UVX5	Metabotropic glutamate receptor 5 OS=Mus musculus OX=10090 GN=Grm5 PE=1 SV=2	7.84	131.8	5.48628	3	2	0	0.25	-2	-0.03125	2	0.03125
Q61687	Transcriptional regulator ATRX OS=Mus musculus OX=10090 GN=Atrx PE=1 SV=3	6.68	278.4	2.54443	2	2	0	0.25	-2	-0.03125	2	0.03125
Q62424	Homeobox protein Hox-A13 OS=Mus musculus OX=10090 GN=Hoxa13 PE=1 SV=1	9.13	39.5	2.59067	7	1	0	0.25	-2	-0.03125	2	0.03125
Q6IRU5	Clathrin light chain B OS=Mus musculus OX=10090 GN=Cltb PE=1 SV=1	4.63	25.2	16.5939	9	4	0	0.25	-2	-0.03125	2	0.03125
Q6NZF1	Zinc finger CCCH domain-containing protein 11A OS=Mus musculus OX=10090 GN=Zc3h11a PE=1 SV=1	8.13	86.4	4.67172	2	2	0	0.25	-2	-0.03125	2	0.03125
Q6W049	Olfactory receptor 688 OS=Mus musculus OX=10090 GN=Olfr688 PE=3 SV=2	7.43	35.7	13.3956	2	2	0	0.25	-2	-0.03125	2	0.03125
Q6W8Q3	Purkinje cell protein 4-like protein 1 OS=Mus musculus OX=10090 GN=Pcp4l1 PE=1 SV=1	5.52	7.5	20.5882	6	1	0	0.25	-2	-0.03125	2	0.03125
Q7TPM9	Myotubularin-related protein 10 OS=Mus musculus OX=10090 GN=Mtmr10 PE=1 SV=2	8.68	88.1	1.03761	2	1	0	0.25	-2	-0.03125	2	0.03125
Q810D6	Glutamate-rich WD repeat-containing protein 1 OS=Mus musculus OX=10090 GN=Grwd1 PE=1 SV=2	4.81	49.2	0.896861	3	1	0	0.25	-2	-0.03125	2	0.03125
Q8BPE4	Transmembrane protein 177 OS=Mus musculus OX=10090 GN=Tmem177 PE=1 SV=1	9.77	34	10.2894	2	1	0	0.25	-2	-0.03125	2	0.03125
Q8C2R7	GPI mannosyltransferase 1 OS=Mus musculus OX=10090 GN=Pigm PE=2 SV=2	9.13	49.8	16.0757	3	3	0	0.25	-2	-0.03125	2	0.03125
Q8CA25	Membrane-associated ring finger (C3HC4) 2 OS=Mus musculus OX=10090 GN=Marchf2 PE=1 SV=1	8.27	31.9	8.36237	2	1	0	0.25	-2	-0.03125	2	0.03125
Q8CBC4	Consortin OS=Mus musculus OX=10090 GN=Cnst PE=1 SV=1	4.59	76.8	4.92264	2	2	0	0.25	-2	-0.03125	2	0.03125
Q8CEE6	PAS domain-containing serine/threonine-protein kinase OS=Mus musculus OX=10090 GN=Pask PE=1 SV=3	5.07	151.2	5.06146	3	3	0	0.25	-2	-0.03125	2	0.03125
Q8CIW6	Solute carrier family 26 member 6 OS=Mus musculus OX=10090 GN=Slc26a6 PE=1 SV=2	8.65	82.8	8.5752	2	2	0	0.25	-2	-0.03125	2	0.03125
Q8K501	Olfactory receptor OS=Mus musculus OX=10090 GN=Olfr769 PE=2 SV=1	8.54	34.9	8.33333	2	1	0	0.25	-2	-0.03125	2	0.03125
Q8VBT0	Thioredoxin-related transmembrane protein 1 OS=Mus musculus OX=10090 GN=Tmx1 PE=1 SV=1	5.29	31.4	3.23741	2	1	0	0.25	-2	-0.03125	2	0.03125
Q8VBV4	F-box/WD repeat-containing protein 7 OS=Mus musculus OX=10090 GN=Fbxw7 PE=1 SV=2	5.73	79.8	5.91549	2	2	0	0.25	-2	-0.03125	2	0.03125
Q8VGL6	Olfactory receptor OS=Mus musculus OX=10090 GN=Olfr170 PE=2 SV=1	8.59	35.9	7.02875	2	1	0	0.25	-2	-0.03125	2	0.03125
Q91V98	Endosialin OS=Mus musculus OX=10090 GN=Cd248 PE=1 SV=1	5.66	81.8	5.4902	2	1	0	0.25	-2	-0.03125	2	0.03125
Q91XX4	Protocadherin gamma B6 OS=Mus musculus OX=10090 GN=Pcdhgb6 PE=1 SV=1	5.34	100.6	5.91398	3	1	0	0.25	-2	-0.03125	2	0.03125
Q925N0	Sideroflexin-5 OS=Mus musculus OX=10090 GN=Sfxn5 PE=1 SV=2	9.44	37.3	8.77193	2	2	0	0.25	-2	-0.03125	2	0.03125
Q99KF0	Caspase recruitment domain-containing protein 14 OS=Mus musculus OX=10090 GN=Card14 PE=2 SV=2	6.1	113.4	0.800801	2	1	0	0.25	-2	-0.03125	2	0.03125
Q9CQJ2	PIH1 domain-containing protein 1 OS=Mus musculus OX=10090 GN=Pih1d1 PE=1 SV=1	5.21	32.2	2.75862	6	1	0	0.25	-2	-0.03125	2	0.03125
[truncated: 47 more rows]
